# Supplementary material for: Analysis of the Proteomic Profile in Serum of Irradiated Nonhuman Primates Treated with Ex-Rad, a Radiation Medical Countermeasure
Source: PubMed Central journal article supplement — J Proteome Res. 2023 Mar 28;22(4):1116–26. doi: 10.1021/acs.jproteome.2c00458 (PMC10088047; doi:10.1021/acs.jproteome.2c00458), 2023-03-28
Supplement: pr2c00458_si_001.pdf [file pr2c00458_si_001.pdf]

## Supplementary Materials

### Analysis of the Proteomic Profile in Serum of Irradiated Nonhuman Primates treated with Ex-Rad, a Radiation Medical Countermeasure

Alana D. Carpenter,<sup>1,2,§</sup> Yaoxiang Li,<sup>3,§</sup> Brianna L. Janocha,<sup>1,2</sup> Stephen Y. Wise,<sup>1,2</sup> Oluseyi O. Fatanmi,<sup>1,2</sup> Manoj Maniar,<sup>4</sup> Amrita K. Cheema,<sup>3,5</sup> Vijay K. Singh<sup>1,2\*</sup>

1 Division of Radioprotectants, Department of Pharmacology and Molecular Therapeutics, F. Edward Hébert School of Medicine, Uniformed Services University of the Health Sciences, Bethesda, MD 20814, USA;

2 Armed Forces Radiobiology Research Institute, Uniformed Services University of the Health Sciences, Bethesda, MD 20814, USA;

3 Department of Oncology, Lombardi Comprehensive Cancer Center, Georgetown University Medical Center, Washington, DC 20057, USA;

4 Onconova Therapeutics, Inc., 375 Pheasant Run, Newtown, PA 18940, USA;

5 Department of Biochemistry, Molecular and Cellular Biology, Georgetown University Medical Center, Washington DC 20057, USA

§Equal contribution

#### \*Corresponding author:

Vijay K. Singh, Ph.D., [vijay.singh@usuhs.edu](mailto:vijay.singh@usuhs.edu)

#### Contents

Supplementary Table 1. UniProt Ids, protein names, and gene names

Supplementary Table 2. Comprehensive data of the effects of radiation at different time points

Supplementary Table 3. List of proteins less altered by radiation at 48 h due to Ex-Rad I administration

Supplementary Table 4. List of proteins less altered by radiation at 96 h due to Ex-Rad I administration

Supplementary Table 5. List of proteins less altered by radiation at 96 h due to Ex-Rad II administration

Supplementary Table 6. Comparison of the effects of radiation at 24 h post-irradiation

Supplementary Table 7. Comparison of the effects of radiation at 36 h post-irradiation

Supplementary Table 8. Comparison of the effects of radiation at 48 h post-irradiation

Supplementary Table 9. Comparison of the effects of radiation at 96 h post-irradiation

Supplementary Figure 1. Blood chemistry data at different time points

**Supplementary Table 1.** UniProt IDs, protein names, and gene names for all 295 proteins analyzed in this study.

| <b>UniProtKB</b> | <b>ProteinNames</b>                                               | <b>GeneNames</b> |
|------------------|-------------------------------------------------------------------|------------------|
| P62258           | 14-3-3 protein epsilon                                            | YWHAE            |
| P61981           | 14-3-3 protein gamma                                              | YWHAG            |
| P63104           | 14-3-3 protein zeta/delta                                         | YWHAZ            |
| A0A2R8Y6G6       | 2-phospho-D-glycerate hydro-lyase                                 | ENO1             |
| P08253           | 72 kDa type IV collagenase                                        | MMP2             |
| A0A7P0TAI0       | 78 kDa glucose-regulated protein                                  | HSPA5            |
| Q76LX8           | A disintegrin and metalloproteinase with thrombospondin motifs 13 | ADAMTS13         |
| Q92484           | Acid sphingomyelinase-like phosphodiesterase 3a                   | SMPDL3A          |
| P68032           | Actin, alpha cardiac muscle 1                                     | ACTC1            |
| P60709           | Actin, cytoplasmic 1                                              | ACTB             |
| I3L4N8           | Actin, cytoplasmic 2                                              | ACTG1            |
| Q15848           | Adiponectin                                                       | ADIPOQ           |
| K7ERG9           | Adipsin                                                           | CFD              |
| P43652           | Afamin                                                            | AFM              |
| A0A0C4DGB6       | Albumin                                                           | ALB              |
| P02763           | Alpha-1-acid glycoprotein 1                                       | ORM1             |
| P01011           | Alpha-1-antichymotrypsin                                          | SERPINA3         |
| A0A024R6I7       | Alpha-1-antitrypsin                                               | SERPINA1         |
| P04217           | Alpha-1B-glycoprotein                                             | A1BG             |
| P08697           | Alpha-2-antiplasmin                                               | SERPINF2         |
| C9JV77           | Alpha-2-HS-glycoprotein                                           | AHSG             |
| P01023           | Alpha-2-macroglobulin                                             | A2M              |
| A0A7I2V4Y4       | Alpha-actinin-1                                                   | ACTN1            |
| A0A0C4DGL1       | Alpha-mannosidase 2x                                              | MAN2A2           |
| P54802           | Alpha-N-acetylglucosaminidase                                     | NAGLU            |
| A0A7P0T8D1       | Angiotensin 1-10                                                  | AGT              |
| A0A0A0MSN4       | Angiotensin-converting enzyme                                     | ACE              |
| P04083           | Annexin A1                                                        | ANXA1            |
| P01008           | Antithrombin-III                                                  | SERPINC1         |
| F8W696           | Apolipoprotein A-I                                                | APOA1            |
| P06727           | Apolipoprotein A-IV                                               | APOA4            |

|            |                                                 |             |
|------------|-------------------------------------------------|-------------|
| P04114     | Apolipoprotein B-100                            | APOB        |
| K7ER74     | Apolipoprotein C-II                             | APOC4-APOC2 |
| B0YIW2     | Apolipoprotein C-III                            | APOC3       |
| P02649     | Apolipoprotein E                                | APOE        |
| P08519     | Apolipoprotein(a)                               | LPA         |
| O75882     | Attractin                                       | ATRN        |
| P02749     | Beta-2-glycoprotein 1                           | APOH        |
| J3KRP0     | Beta-Ala-His dipeptidase                        | CNDP1       |
| P43251     | Biotinidase                                     | BTD         |
| J3KSD8     | Bleomycin hydrolase (Fragment)                  | BLMH        |
| Q9UBW5     | Bridging integrator 2                           | BIN2        |
| B4E1Z4     | C3/C5 convertase                                |             |
| P04003     | C4b-binding protein alpha chain                 | C4BPA       |
| P20851     | C4b-binding protein beta chain                  | C4BPB       |
| H3BNC6     | Cadherin-1                                      | CDH1        |
| P55290     | Cadherin-13                                     | CDH13       |
| P33151     | Cadherin-5                                      | CDH5        |
| Q9NZT1     | Calmodulin-like protein 5                       | CALML5      |
| E5RFL2     | Carbonate dehydratase I (Fragment)              | CA1         |
| P00918     | Carbonic anhydrase 2                            | CA2         |
| A0A087WSY5 | Carboxypeptidase B2                             | CPB2        |
| P15169     | Carboxypeptidase N catalytic chain              | CPN1        |
| P22792     | Carboxypeptidase N subunit 2                    | CPN2        |
| E5RH35     | Carboxypeptidase Q (Fragment)                   | CPQ         |
| A0A0C4DFP6 | Cartilage acidic protein 1                      | CRTAC1      |
| G3XAP6     | Cartilage oligomeric matrix protein             | COMP        |
| P04040     | Catalase                                        | CAT         |
| A0A7P0T8I6 | Cathepsin X                                     | CTSZ        |
| P11717     | Cation-independent mannose-6-phosphate receptor | IGF2R       |
| Q6YHK3     | CD109 antigen                                   | CD109       |
| H0Y2P0     | CD44 antigen (Fragment)                         | CD44        |
| O43866     | CD5 antigen-like                                | CD5L        |
| P00450     | Ceruloplasmin                                   | CP          |
| P36222     | Chitinase-3-like protein 1                      | CHI3L1      |

|            |                                                     |        |
|------------|-----------------------------------------------------|--------|
| O00299     | Chloride intracellular channel protein 1            | CLIC1  |
| H3BRJ9     | Cholesteryl ester transfer protein                  | CETP   |
| P06276     | Cholinesterase                                      | BCHE   |
| P08217     | Chymotrypsin-like elastase family member 2A         | CELA2A |
| P08861     | Chymotrypsin-like elastase family member 3B         | CELA3B |
| P10909     | Clusterin                                           | CLU    |
| Q14019     | Coactosin-like protein                              | COTL1  |
| P00740     | Coagulation factor IX                               | F9     |
| A0A0A0MRJ7 | Coagulation factor V                                | F5     |
| F5H8B0     | Coagulation factor VII                              | F7     |
| P00742     | Coagulation factor X                                | F10    |
| P03951     | Coagulation factor XI                               | F11    |
| P00748     | Coagulation factor XII                              | F12    |
| P00488     | Coagulation factor XIII A chain                     | F13A1  |
| P05160     | Coagulation factor XIII B chain                     | F13B   |
| O00748     | Cocaine esterase                                    | CES2   |
| E9PP50     | Cofilin, non-muscle isoform (Fragment)              | CFL1   |
| P02452     | Collagen alpha-1(I) chain                           | COL1A1 |
| P02745     | Complement C1q subcomponent subunit A               | C1QA   |
| A0A0A0MSV6 | Complement C1q subcomponent subunit B (Fragment)    | C1QB   |
| P02747     | Complement C1q subcomponent subunit C               | C1QC   |
| H0YFL7     | Complement C1r subcomponent-like protein (Fragment) | C1RL   |
| A0A087X232 | Complement C1s subcomponent                         | C1S    |
| P06681     | Complement C2                                       | C2     |
| P01024     | Complement C3                                       | C3     |
| P0C0L4     | Complement C4-A                                     | C4A    |
| P0C0L5     | Complement C4-B                                     | C4B    |
| P01031     | Complement C5                                       | C5     |
| F5GY80     | Complement component 8 subunit beta                 | C8B    |
| P13671     | Complement component C6                             | C6     |
| P10643     | Complement component C7                             | C7     |
| P07357     | Complement component C8 alpha chain                 | C8A    |
| P07360     | Complement component C8 gamma chain                 | C8G    |
| P02748     | Complement component C9                             | C9     |

|            |                                                                  |          |
|------------|------------------------------------------------------------------|----------|
| A0A0C4DGF5 | Complement component receptor 1-like protein (Fragment)          | CR1L     |
| P08603     | Complement factor H                                              | CFH      |
| Q9BXR6     | Complement factor H-related protein 5                            | CFHR5    |
| E7ETH0     | Complement factor I                                              | CFI      |
| E9PDY4     | Complement receptor type 1                                       | CR1      |
| P20023     | Complement receptor type 2                                       | CR2      |
| A0A3B3ISR2 | Complement subcomponent C1r                                      | C1R      |
| B4E3S0     | Coronin                                                          | CORO1C   |
| P31146     | Coronin-1A                                                       | CORO1A   |
| P08185     | Corticosteroid-binding globulin                                  | SERPINA6 |
| P02741     | C-reactive protein                                               | CRP      |
| P01034     | Cystatin-C                                                       | CST3     |
| P32320     | Cytidine deaminase                                               | CDA      |
| P81605     | Dermcidin                                                        | DCD      |
| Q02413     | Desmoglein-1                                                     | DSG1     |
| Q9UHL4     | Dipeptidyl peptidase 2                                           | DPP7     |
| E5RIA2     | Ectonucleotide pyrophosphatase/phosphodiesterase family member 2 | ENPP2    |
| Q12805     | EGF-containing fibulin-like extracellular matrix protein 1       | EFEMP1   |
| A0A0U1RQQ4 | Endothelial protein C receptor (Fragment)                        | PROCR    |
| O75715     | Epididymal secretory glutathione peroxidase                      | GPX5     |
| Q9UBQ6     | Exostosin-like 2                                                 | EXTL2    |
| Q16610     | Extracellular matrix protein 1                                   | ECM1     |
| P08294     | Extracellular superoxide dismutase [Cu-Zn]                       | SOD3     |
| Q86UX7     | Fermitin family homolog 3                                        | FERMT3   |
| C9JC68     | Fetuin-B (Fragment)                                              | FETUB    |
| P02671     | Fibrinogen alpha chain                                           | FGA      |
| P02675     | Fibrinogen beta chain                                            | FGB      |
| C9JC84     | Fibrinogen gamma chain                                           | FGG      |
| P02751     | Fibronectin                                                      | FN1      |
| H0Y4K8     | Fibronectin (Fragment)                                           | FN1      |
| P23142     | Fibulin-1                                                        | FBLN1    |
| A0A087WVE2 | Ficolin-1                                                        | FCN1     |
| Q15485     | Ficolin-2                                                        | FCN2     |
| O75636     | Ficolin-3                                                        | FCN3     |

|            |                                                                |             |
|------------|----------------------------------------------------------------|-------------|
| P21333     | Filamin-A                                                      | FLNA        |
| P04075     | Fructose-bisphosphate aldolase A                               | ALDOA       |
| P09972     | Fructose-bisphosphate aldolase C                               | ALDOC       |
| Q08380     | Galectin-3-binding protein                                     | LGALS3BP    |
| D6RF35     | Gc-globulin                                                    | GC          |
| P06396     | Gelsolin                                                       | GSN         |
| M0QX47     | Glia maturation factor gamma                                   | GMFG        |
| A0A2R8Y7X9 | GLOBIN domain-containing protein                               |             |
| A0A0J9YXP8 | Glucose-6-phosphate isomerase (Fragment)                       | GPI         |
| A0A087X1J7 | Glutathione peroxidase                                         | GPX3        |
| P09211     | Glutathione S-transferase P                                    | GSTP1       |
| E7EUT5     | Glyceraldehyde-3-phosphate dehydrogenase                       | GAPDH       |
| A0A0C4DGZ8 | Glycoprotein Ib (Platelet), alpha polypeptide                  | GP1BA       |
| P00738     | Haptoglobin                                                    | HP          |
| P00739     | Haptoglobin-related protein                                    | HPR         |
| G3V1N2     | HCG1745306, isoform CRA_a                                      | HBA2        |
| E9PKE3     | Heat shock cognate 71 kDa protein                              | HSPA8       |
| P69905     | Hemoglobin subunit alpha                                       | HBA1        |
| P68871     | Hemoglobin subunit beta                                        | HBB         |
| P02042     | Hemoglobin subunit delta                                       | HBD         |
| P02790     | Hemopexin                                                      | HPX         |
| P05546     | Heparin cofactor 2                                             | SERPIND1    |
| Q04756     | Hepatocyte growth factor activator                             | HGFAC       |
| G3XAK1     | Hepatocyte growth factor-like protein                          | MST1        |
| P04196     | Histidine-rich glycoprotein                                    | HRG         |
| Q14520     | Hyaluronan-binding protein 2                                   | HABP2       |
| A0A087WXI2 | IgGfc-binding protein                                          | FCGBP       |
| A0A0G2JMB2 | Immunoglobulin heavy constant alpha 2 (Fragment)               | IGHA2       |
| P01871     | Immunoglobulin heavy constant mu                               | IGHM        |
| A0A0B4J2H0 | Immunoglobulin heavy variable 1-69D                            | IGHV1-69D   |
| A0A075B7D8 | Immunoglobulin heavy variable 3/OR15-7 (pseudogene) (Fragment) | IGHV3OR15-7 |
| A0A4W8ZXM2 | Immunoglobulin heavy variable 3-72                             | IGHV3-72    |
| A0A075B6R2 | Immunoglobulin heavy variable 4-4                              | IGHV4-4     |
| D6RD17     | Immunoglobulin J chain (Fragment)                              | JCHAIN      |

|            |                                                                        |          |
|------------|------------------------------------------------------------------------|----------|
| A0A5H1ZRQ3 | Immunoglobulin kappa constant (Fragment)                               | IGKC     |
| A0A075B6P5 | Immunoglobulin kappa variable 2-28                                     | IGKV2-28 |
| P0CF74     | Immunoglobulin lambda constant 6                                       | IGLC6    |
| A0A075B6K5 | Immunoglobulin lambda variable 3-9                                     | IGLV3-9  |
| P15814     | Immunoglobulin lambda-like polypeptide 1                               | IGLL1    |
| P05019     | Insulin-like growth factor I                                           | IGF1     |
| P01344     | Insulin-like growth factor II                                          | IGF2     |
| P18065     | Insulin-like growth factor-binding protein 2                           | IGFBP2   |
| A6XND0     | Insulin-like growth factor-binding protein 3                           | IGFBP3   |
| A0A3B3IUE0 | Insulin-like growth factor-binding protein 6                           | IGFBP6   |
| P35858     | Insulin-like growth factor-binding protein complex acid labile subunit | IGFALS   |
| P19827     | Inter-alpha-trypsin inhibitor heavy chain H1                           | ITIH1    |
| P19823     | Inter-alpha-trypsin inhibitor heavy chain H2                           | ITIH2    |
| A0A087WW43 | Inter-alpha-trypsin inhibitor heavy chain H3                           | ITIH3    |
| Q9NPH3     | Interleukin-1 receptor accessory protein                               | IL1RAP   |
| P27930     | Interleukin-1 receptor type 2                                          | IL1R2    |
| B7ZKJ8     | ITIH4 protein                                                          | ITIH4    |
| P29622     | Kallistatin                                                            | SERPINA4 |
| A0A1B0GVI3 | Keratin, type I cytoskeletal 10                                        | KRT10    |
| P08779     | Keratin, type I cytoskeletal 16                                        | KRT16    |
| P35527     | Keratin, type I cytoskeletal 9                                         | KRT9     |
| P04264     | Keratin, type II cytoskeletal 1                                        | KRT1     |
| P35908     | Keratin, type II cytoskeletal 2 epidermal                              | KRT2     |
| P13647     | Keratin, type II cytoskeletal 5                                        | KRT5     |
| P02538     | Keratin, type II cytoskeletal 6A                                       | KRT6A    |
| P04259     | Keratin, type II cytoskeletal 6B                                       | KRT6B    |
| P01042     | Kininogen-1                                                            | KNG1     |
| E7EQB2     | Lactotransferrin (Fragment)                                            | LTF      |
| C9JD84     | Latent-transforming growth factor beta-binding protein 1               | LTBP1    |
| P02750     | Leucine-rich alpha-2-glycoprotein                                      | LRG1     |
| A0A3B3IS95 | L-lactate dehydrogenase                                                |          |
| C9JC71     | Low affinity immunoglobulin gamma Fc region receptor III-A (Fragment)  | FCGR3A   |
| P51884     | Lumican                                                                | LUM      |
| E9PEK4     | Macrophage colony-stimulating factor 1 receptor                        | CSF1R    |

|            |                                                         |          |
|------------|---------------------------------------------------------|----------|
| P48740     | Mannan-binding lectin serine protease 1                 | MASP1    |
| O00187     | Mannan-binding lectin serine protease 2                 | MASP2    |
| P33908     | Mannosyl-oligosaccharide 1,2-alpha-mannosidase IA       | MAN1A1   |
| Q16853     | Membrane primary amine oxidase                          | AOC3     |
| P08571     | Monocyte differentiation antigen CD14                   | CD14     |
| P03971     | Muellerian-inhibiting factor                            | AMH      |
| Q7Z7M0     | Multiple epidermal growth factor-like domains protein 8 | MEGF8    |
| P05164     | Myeloperoxidase                                         | MPO      |
| F8W1R7     | Myosin light polypeptide 6                              | MYL6     |
| P12882     | Myosin-1                                                | MYH1     |
| P35579     | Myosin-9                                                | MYH9     |
| Q96PD5     | N-acetylmuramoyl-L-alanine amidase                      | PGLYRP2  |
| Q15223     | Nectin-1                                                | NECTIN1  |
| A0A087WTE4 | Neural cell adhesion molecule 1                         | NCAM1    |
| A0A087X0M8 | Neural cell adhesion molecule L1-like protein           | CHL1     |
| P04746     | Pancreatic alpha-amylase                                | AMY2A    |
| O95497     | Pantetheinase                                           | VNN1     |
| A0A1B0GU03 | Peptidase A1 domain-containing protein                  |          |
| P62937     | Peptidyl-prolyl cis-trans isomerase A                   | PPIA     |
| B1ALD9     | Periostin                                               | POSTN    |
| A0A0A0MRQ5 | Peroxiredoxin-1                                         | PRDX1    |
| P32119     | Peroxiredoxin-2                                         | PRDX2    |
| P30041     | Peroxiredoxin-6                                         | PRDX6    |
| P04180     | Phosphatidylcholine-sterol acyltransferase              | LCAT     |
| P80108     | Phosphatidylinositol-glycan-specific phospholipase D    | GPLD1    |
| P18669     | Phosphoglycerate mutase 1                               | PGAM1    |
| P55058     | Phospholipid transfer protein                           | PLTP     |
| P36955     | Pigment epithelium-derived factor                       | SERPINF1 |
| H0YAC1     | Plasma kallikrein (Fragment)                            | KLKB1    |
| A0A7I2V2D2 | Plasma protease C1 inhibitor                            | SERPING1 |
| P00747     | Plasminogen                                             | PLG      |
| P13796     | Plastin-2                                               | LCP1     |
| P02775     | Platelet basic protein                                  | PPBP     |
| P02776     | Platelet factor 4                                       | PF4      |



|            |                                                             |            |
|------------|-------------------------------------------------------------|------------|
| P10720     | Platelet factor 4 variant                                   | PF4V1      |
| P08567     | Pleckstrin                                                  | PLEK       |
| P20742     | Pregnancy zone protein                                      | PZP        |
| F8W8W4     | Prenylcysteine oxidase 1                                    | PCYOX1     |
| A0A075B6R9 | Probable non-functional immunoglobulin kappa variable 2D-24 | IGKV2D-24  |
| Q15113     | Procollagen C-endopeptidase enhancer 1                      | PCOLCE     |
| P07737     | Profilin-1                                                  | PFN1       |
| P12273     | Prolactin-inducible protein                                 | PIP        |
| P02760     | Protein AMBP                                                | AMBP       |
| P05109     | Protein S100-A8                                             | S100A8     |
| P06702     | Protein S100-A9                                             | S100A9     |
| G3V2W1     | Protein Z-dependent protease inhibitor                      | SERPINA10  |
| Q92954     | Proteoglycan 4                                              | PRG4       |
| P00734     | Prothrombin                                                 | F2         |
| Q9NPG4     | Protocadherin-12                                            | PCDH12     |
| Q16609     | Putative apolipoprotein(a)-like protein 2                   | LPAL2      |
| Q6ZMU1     | Putative protein C3P1                                       | C3P1       |
| Q6UXR4     | Putative serpin A13                                         | SERPINA13P |
| A0A804F6T5 | Pyruvate kinase PKM                                         | PKM        |
| A6NIZ1     | Ras-related protein Rap-1b-like protein                     |            |
| P23470     | Receptor-type tyrosine-protein phosphatase gamma            | PTPRG      |
| P02753     | Retinol-binding protein 4                                   | RBP4       |
| O95980     | Reversion-inducing cysteine-rich protein with Kazal motifs  | RECK       |
| J3KRE2     | Rho GDP-dissociation inhibitor 1                            | ARHGDI1    |
| A0A096LPE2 | SAA2-SAA4 readthrough                                       | SAA2-SAA4  |
| C9JHR8     | Scavenger receptor cysteine-rich type 1 protein M130        | CD163      |
| A0A182DWH7 | Selenoprotein P (Fragment)                                  | SELENOP    |
| P02787     | Serotransferrin                                             | TF         |
| P02743     | Serum amyloid P-component                                   | APCS       |
| A0A0C4DGN2 | Sex hormone-binding globulin (Fragment)                     | SHBG       |
| P09486     | SPARC                                                       | SPARC      |
| O00391     | Sulfhydryl oxidase 1                                        | QSOX1      |
| Q9Y490     | Talin-1                                                     | TLN1       |
| A0A087WXC4 | Tenascin-N                                                  | TNN        |

|            |                                                       |          |
|------------|-------------------------------------------------------|----------|
| E9PHK0     | Tetranectin                                           | CLEC3B   |
| P07996     | Thrombospondin-1                                      | THBS1    |
| E7ES19     | Thrombospondin-4                                      | THBS4    |
| P62328     | Thymosin beta-4                                       | TMSB4X   |
| P05543     | Thyroxine-binding globulin                            | SERPINA7 |
| F2Z393     | Transaldolase                                         | TALDO1   |
| Q15582     | Transforming growth factor-beta-induced protein ig-h3 | TGFBI    |
| P37802     | Transgelin-2                                          | TAGLN2   |
| A0A087WT59 | Transthyretin                                         | TTR      |
| O43280     | Trehalase                                             | TREH     |
| P60174     | Triosephosphate isomerase                             | TPI1     |
| P67936     | Tropomyosin alpha-4 chain                             | TPM4     |
| P68363     | Tubulin alpha-1B chain                                | TUBA1B   |
| P68366     | Tubulin alpha-4A chain                                | TUBA4A   |
| Q9H4B7     | Tubulin beta-1 chain                                  | TUBB1    |
| Q6EMK4     | Vasorin                                               | VASN     |
| A0A7I2V2Y2 | Vesicle-fusing ATPase                                 | VCP      |
| P18206     | Vinculin                                              | VCL      |
| E7END6     | Vitamin K-dependent protein C                         | PROC     |
| A0A0S2Z4L3 | Vitamin K-dependent protein S (Fragment)              | PROS1    |
| P22891     | Vitamin K-dependent protein Z                         | PROZ     |
| Q7Z5L0     | Vitelline membrane outer layer protein 1 homolog      | VMO1     |
| P04004     | Vitronectin                                           | VTN      |
| P04275     | von Willebrand factor                                 | VWF      |
| O75083     | WD repeat-containing protein 1                        | WDR1     |
| P25311     | Zinc-alpha-2-glycoprotein                             | AZGP1    |











**Supplementary Table 3.** A comprehensive list of proteins that are less altered by radiation at 48 h when compared to baseline values due to the administration of Ex-Rad I (administered at 24 and 36 h post-irradiation).

| UniProtKB  | ProteinNames                                                      | 48 Hour vs. Pre |          |         |          | 48 Hour ExRad I vs. Vehicle |         |         |          |
|------------|-------------------------------------------------------------------|-----------------|----------|---------|----------|-----------------------------|---------|---------|----------|
|            |                                                                   | p-value         | FDR      | FC      | Log2(FC) | p-value                     | FDR     | FC      | Log2(FC) |
| P62258     | 14-3-3 protein epsilon                                            | 0.27313         | 0.6104   | 1.1092  | 0.1495   | 0.9493                      | 0.98426 | 0.99439 | -0.008   |
| P61981     | 14-3-3 protein gamma                                              | 0.32727         | 0.6451   | 1.8389  | 0.8788   | 0.68167                     | 0.94631 | 0.7974  | -0.327   |
| A0A2R8Y6G6 | 2-phospho-D-glycerate hydro-lyase                                 | 0.36442         | 0.65551  | 1.1576  | 0.2112   | 0.18474                     | 0.82645 | 0.76827 | -0.38    |
| P08253     | 72 kDa type IV collagenase                                        | 0.10398         | 0.40261  | 1.1908  | 0.2519   | 0.35512                     | 0.82645 | 0.8874  | -0.172   |
| Q76LX8     | A disintegrin and metalloproteinase with thrombospondin motifs 13 | 0.18687         | 0.53008  | 1.3768  | 0.4613   | 0.88646                     | 0.96004 | 0.96634 | -0.049   |
| Q92484     | Acid sphingomyelinase-like phosphodiesterase 3a                   | 0.53894         | 0.75708  | 1.447   | 0.533    | 0.71882                     | 0.94631 | 0.73299 | -0.448   |
| P68032     | Actin, alpha cardiac muscle 1                                     | 0.18487         | 0.53008  | 2.1368  | 1.0955   | 0.68228                     | 0.94631 | 0.74784 | -0.419   |
| P60709     | Actin, cytoplasmic 1                                              | 0.25534         | 0.59781  | 2.0347  | 1.0248   | 0.53295                     | 0.89861 | 0.72896 | -0.456   |
| I3L4N8     | Actin, cytoplasmic 2                                              | 0.1889          | 0.53071  | 1.4663  | 0.5521   | 0.30159                     | 0.82645 | 0.72769 | -0.459   |
| Q15848     | Adiponectin                                                       | 0.31674         | 0.63563  | 1.0929  | 0.1282   | 0.13111                     | 0.74108 | 0.82239 | -0.282   |
| K7ERG9     | Adipsin                                                           | 0.08268         | 0.38715  | 1.1296  | 0.1758   | 0.19228                     | 0.82645 | 0.8831  | -0.179   |
| P43652     | Afamin                                                            | 0.38094         | 0.66891  | 1.0644  | 0.09     | 0.10858                     | 0.66596 | 0.87295 | -0.196   |
| A0A0C4DGB6 | Albumin                                                           | 0.019155        | 0.20181  | 0.48551 | -1.042   | 0.26486                     | 0.82645 | 1.2667  | 0.3411   |
| P01011     | Alpha-1-antichymotrypsin                                          | 0.000155        | 0.016678 | 5.9784  | 2.5798   | 0.066679                    | 0.54854 | 0.49363 | -1.019   |
| A0A024R6I7 | Alpha-1-antitrypsin                                               | 0.047085        | 0.29554  | 1.4221  | 0.508    | 0.034877                    | 0.537   | 0.65591 | -0.608   |
| P04217     | Alpha-1B-glycoprotein                                             | 0.95809         | 0.9848   | 0.99234 | -0.011   | 0.79035                     | 0.96004 | 1.0431  | 0.0608   |
| P08697     | Alpha-2-antiplasmin                                               | 0.35644         | 0.6451   | 1.0841  | 0.1165   | 0.2199                      | 0.82645 | 0.86438 | -0.241   |
| P01023     | Alpha-2-macroglobulin                                             | 0.58711         | 0.77375  | 0.97127 | -0.042   | 0.36684                     | 0.82645 | 1.0814  | 0.113    |
| A0A7I2V4Y4 | Alpha-actinin-1                                                   | 0.70769         | 0.83843  | 0.96874 | -0.046   | 0.55173                     | 0.90291 | 1.0455  | 0.0642   |
| P54802     | Alpha-N-acetylglucosaminidase                                     | 0.013815        | 0.15675  | 0.8079  | -0.308   | 0.48666                     | 0.891   | 1.147   | 0.1979   |
| A0A7P0T8D1 | Angiotensin 1-10                                                  | 0.011837        | 0.15675  | 1.4251  | 0.5111   | 0.045385                    | 0.537   | 0.75583 | -0.404   |
| A0A0A0MSN4 | Angiotensin-converting enzyme                                     | 0.27208         | 0.6104   | 0.8582  | -0.221   | 0.4586                      | 0.89035 | 1.1497  | 0.2012   |
| P04083     | Annexin A1                                                        | 0.24924         | 0.59045  | 0.77774 | -0.363   | 0.060497                    | 0.54081 | 1.3335  | 0.4152   |
| P01008     | Antithrombin-III                                                  | 0.20776         | 0.54722  | 1.1151  | 0.1572   | 0.56769                     | 0.90291 | 0.94745 | -0.078   |
| F8W696     | Apolipoprotein A-I                                                | 0.07094         | 0.3547   | 0.87578 | -0.191   | 0.21987                     | 0.82645 | 1.0875  | 0.1211   |
| P04114     | Apolipoprotein B-100                                              | 0.087767        | 0.3887   | 1.1534  | 0.2059   | 0.62514                     | 0.92672 | 0.95194 | -0.071   |
| K7ER74     | Apolipoprotein C-II                                               | 0.71352         | 0.8386   | 0.87271 | -0.196   | 0.3092                      | 0.82645 | 1.424   | 0.51     |
| B0Y1W2     | Apolipoprotein C-III                                              | 0.50199         | 0.74044  | 0.82499 | -0.278   | 0.15579                     | 0.80627 | 1.2617  | 0.3354   |
| P02649     | Apolipoprotein E                                                  | 0.000197        | 0.016678 | 1.4878  | 0.5732   | 0.76941                     | 0.96004 | 0.9797  | -0.03    |
| P08519     | Apolipoprotein(a)                                                 | 0.19077         | 0.53092  | 1.0498  | 0.0702   | 0.000778                    | 0.22962 | 0.77645 | -0.365   |
| O75882     | Attractin                                                         | 0.51432         | 0.74381  | 1.0468  | 0.066    | 0.020388                    | 0.537   | 0.81147 | -0.301   |
| J3KRPO     | Beta-Ala-His dipeptidase                                          | 0.24663         | 0.59045  | 1.0526  | 0.0739   | 0.005881                    | 0.537   | 0.75127 | -0.413   |
| P43251     | Biotinidase                                                       | 0.26888         | 0.6104   | 1.3054  | 0.3845   | 0.066941                    | 0.54854 | 0.62418 | -0.68    |
| B4E1Z4     | C3/C5 convertase                                                  | 0.000226        | 0.016678 | 1.2011  | 0.2643   | 0.046606                    | 0.537   | 0.88804 | -0.171   |
| P04003     | C4b-binding protein alpha chain                                   | 0.34405         | 0.6451   | 1.0086  | 0.0124   | 0.3446                      | 0.82645 | 0.92527 | -0.112   |
| P20851     | C4b-binding protein beta chain                                    | 0.5735          | 0.77375  | 0.91421 | -0.129   | 0.33152                     | 0.82645 | 1.1772  | 0.2354   |
| H3BNC6     | Cadherin-1                                                        | 0.28371         | 0.62387  | 1.3885  | 0.4735   | 0.87159                     | 0.96004 | 0.91688 | -0.125   |
| P33151     | Cadherin-5                                                        | 0.19511         | 0.53791  | 1.1258  | 0.1709   | 0.038152                    | 0.537   | 0.75961 | -0.397   |
| P00918     | Carbonic anhydrase 2                                              | 0.58332         | 0.77375  | 0.90324 | -0.147   | 0.60362                     | 0.92014 | 1.0466  | 0.0657   |
| A0A087WSY5 | Carboxypeptidase B2                                               | 0.70108         | 0.83768  | 1.0191  | 0.0272   | 0.22508                     | 0.82645 | 0.86493 | -0.209   |
| P15169     | Carboxypeptidase N catalytic chain                                | 0.43301         | 0.72539  | 0.92785 | -0.108   | 0.3188                      | 0.82645 | 1.1091  | 0.1494   |
| P22792     | Carboxypeptidase N subunit 2                                      | 0.2405          | 0.59045  | 1.197   | 0.2594   | 0.11062                     | 0.66596 | 0.73602 | -0.442   |
| E5RH35     | Carboxypeptidase Q (Fragment)                                     | 0.58752         | 0.77375  | 0.71269 | -0.489   | 0.41215                     | 0.87315 | 1.4795  | 0.5651   |
| A0A0C4DFP6 | Cartilage acidic protein 1                                        | 0.15688         | 0.4903   | 1.088   | 0.1216   | 0.58729                     | 0.9168  | 0.96174 | -0.056   |
| G3XAP6     | Cartilage oligomeric matrix protein                               | 0.39591         | 0.68701  | 0.88586 | -0.175   | 0.49279                     | 0.891   | 1.3292  | 0.4106   |
| A0A7P0T8I6 | Cathepsin X                                                       | 0.062938        | 0.32573  | 1.5726  | 0.6532   | 0.42029                     | 0.87315 | 0.81694 | -0.292   |
| P11717     | Cation-independent mannose-6-phosphate receptor                   | 0.20603         | 0.54722  | 1.1287  | 0.1747   | 0.35372                     | 0.82645 | 0.90517 | -0.144   |
| Q6YHK3     | CD109 antigen                                                     | 0.16222         | 0.49335  | 0.875   | -0.193   | 0.058116                    | 0.537   | 1.2315  | 0.3004   |
| O00299     | Chloride intracellular channel protein 1                          | 0.69682         | 0.83768  | 1.1407  | 0.1899   | 0.87997                     | 0.96004 | 0.98363 | -0.024   |
| H3BRJ9     | Cholesteryl ester transfer protein                                | 0.089598        | 0.3887   | 0.30149 | -1.73    | 0.51901                     | 0.89861 | 1.0697  | 0.0971   |
| P08217     | Chymotrypsin-like elastase family member 2A                       | 0.069717        | 0.35459  | 1.416   | 0.5019   | 0.46965                     | 0.891   | 0.89146 | -0.166   |
| P08861     | Chymotrypsin-like elastase family member 3B                       | 0.10499         | 0.40261  | 3.4899  | 1.8032   | 0.26062                     | 0.82645 | 0.52939 | -0.918   |
| P00740     | Coagulation factor IX                                             | 0.013158        | 0.15675  | 1.3777  | 0.4623   | 0.28202                     | 0.82645 | 0.86097 | -0.216   |
| F5H8B0     | Coagulation factor VII                                            | 0.15789         | 0.4903   | 1.4239  | 0.5099   | 0.50903                     | 0.89742 | 0.86277 | -0.213   |
| P03951     | Coagulation factor XI                                             | 0.15776         | 0.4903   | 1.1135  | 0.1552   | 0.67755                     | 0.94631 | 0.98571 | -0.021   |
| P00748     | Coagulation factor XII                                            | 0.3521          | 0.6451   | 0.91947 | -0.121   | 0.53346                     | 0.89861 | 1.1357  | 0.1836   |
| P00488     | Coagulation factor XIII A chain                                   | 0.59794         | 0.78049  | 0.92621 | -0.111   | 0.49383                     | 0.891   | 1.0945  | 0.1303   |
| P05160     | Coagulation factor XIII B chain                                   | 0.33038         | 0.6451   | 1.0833  | 0.1155   | 0.44923                     | 0.89035 | 0.92776 | -0.108   |
| O00748     | Cocaine esterase                                                  | 0.54192         | 0.75767  | 0.11601 | -3.108   | 0.46904                     | 0.891   | 7.0232  | 2.8121   |
| P02452     | Collagen alpha-1(I) chain                                         | 0.21186         | 0.55308  | 1.1728  | 0.2299   | 0.41197                     | 0.87315 | 0.91494 | -0.128   |
| P02745     | Complement C1q subcomponent subunit A                             | 0.81447         | 0.89652  | 0.96594 | -0.05    | 0.14484                     | 0.77688 | 1.2531  | 0.3255   |
| H0YFL7     | Complement C1r subcomponent-like protein (Fragment)               | 0.13372         | 0.46963  | 1.1964  | 0.2588   | 0.63885                     | 0.9423  | 0.97823 | -0.032   |
| A0A087X232 | Complement C1s subcomponent                                       | 0.24238         | 0.59045  | 1.0829  | 0.1149   | 0.80003                     | 0.96004 | 0.98676 | -0.019   |
| P06681     | Complement C2                                                     | 0.031898        | 0.26933  | 1.2327  | 0.3018   | 0.34675                     | 0.82645 | 0.8968  | -0.157   |
| P01024     | Complement C3                                                     | 0.03378         | 0.26933  | 1.1829  | 0.2423   | 0.49343                     | 0.891   | 0.94071 | -0.088   |
| P0COL4     | Complement C4-A                                                   | 0.002664        | 0.087307 | 1.1914  | 0.2527   | 0.81188                     | 0.96004 | 0.99487 | -0.007   |
| P0COL5     | Complement C4-B                                                   | 0.20113         | 0.54434  | 1.1541  | 0.2068   | 0.27147                     | 0.82645 | 0.76519 | -0.386   |
| P01031     | Complement C5                                                     | 0.000365        | 0.021505 | 1.2359  | 0.3055   | 0.078066                    | 0.60604 | 0.89673 | -0.157   |
| F5GY80     | Complement component 8 subunit beta                               | 0.038945        | 0.27954  | 1.1658  | 0.2213   | 0.015641                    | 0.537   | 0.82282 | -0.281   |
| P13671     | Complement component C6                                           | 0.005849        | 0.12801  | 1.2272  | 0.2953   | 0.42886                     | 0.87856 | 0.9402  | -0.089   |
| P07357     | Complement component C8 alpha chain                               | 0.99777         | 0.99777  | 0.99765 | -0.003   | 0.99209                     | 0.99209 | 1.0031  | 0.0044   |
| P02748     | Complement component C9                                           | 0.089564        | 0.3887   | 1.2494  | 0.3212   | 0.76627                     | 0.96004 | 0.94713 | -0.078   |
| A0A0C4DGF5 | Complement component receptor 1-like protein (Fragment)           | 0.076031        | 0.36176  | 2.2279  | 1.1557   | 0.17649                     | 0.82645 | 0.60485 | -0.725   |
| E7ETH0     | Complement factor I                                               | 0.18609         | 0.53008  | 1.1914  | 0.2527   | 0.85865                     | 0.96004 | 0.95205 | -0.071   |
| B4E3S0     | Coronin                                                           | 0.25019         | 0.59045  | 0.83874 | -0.254   | 0.096978                    | 0.63782 | 1.3741  | 0.4585   |
| P31146     | Coronin-1A                                                        | 0.50029         | 0.74044  | 0.95372 | -0.068   | 0.20893                     | 0.82645 | 1.1355  | 0.1833   |
| P08185     | Corticosteroid-binding globulin                                   | 0.35477         | 0.6451   | 1.1805  | 0.2394   | 0.28051                     | 0.82645 | 0.56077 | -0.835   |
| P02741     | C-reactive protein                                                | 0.006075        | 0.12801  | 1.6386  | 0.7125   | 0.1153                      | 0.68025 | 0.74102 | -0.432   |

|            |                                                                  |          |          |         |   |        |          |         |          |   |        |
|------------|------------------------------------------------------------------|----------|----------|---------|---|--------|----------|---------|----------|---|--------|
| P81605     | Dermcidin                                                        | 0.30383  | 0.63234  | 1.234   | ↑ | 0.3034 | 0.61929  | 0.92482 | 0.80523  | ↓ | -0.313 |
| Q02413     | Desmoglein-1                                                     | 0.23346  | 0.59045  | 0.72632 | ↓ | -0.461 | 0.0505   | 0.537   | 1.291    | ↑ | 0.3685 |
| Q9UHL4     | Dipeptidyl peptidase 2                                           | 0.40905  | 0.69869  | 1.1372  | ↑ | 0.1855 | 0.68138  | 0.94631 | 0.9428   | ↓ | -0.085 |
| E5RIA2     | Ectonucleotide pyrophosphatase/phosphodiesterase family member 2 | 0.91379  | 0.95424  | 0.96481 | ↓ | -0.052 | 0.77933  | 0.96004 | 1.0582   | ↓ | 0.0816 |
| Q12805     | EGF-containing fibulin-like extracellular matrix protein 1       | 0.5328   | 0.75468  | 1.1552  | ↑ | 0.2081 | 0.54877  | 0.90291 | 0.72586  | ↓ | -0.462 |
| A0A0U1RQ04 | Endothelial protein C receptor (Fragment)                        | 0.3481   | 0.6451   | 0.80752 | ↓ | -0.308 | 0.29055  | 0.82645 | 1.1142   | ↑ | 0.156  |
| O75715     | Epididymal secretory glutathione peroxidase                      | 0.038656 | 0.27954  | 1.4054  | ↑ | 0.491  | 0.33161  | 0.82645 | 0.92877  | ↓ | -0.107 |
| Q9UBQ6     | Exostosin-like 2                                                 | 0.89859  | 0.94673  | 0.90604 | ↓ | -0.142 | 0.58737  | 0.9168  | 1.0524   | ↑ | 0.0737 |
| Q16610     | Extracellular matrix protein 1                                   | 0.64025  | 0.80031  | 0.94361 | ↓ | -0.084 | 0.20965  | 0.82645 | 1.1554   | ↑ | 0.2084 |
| Q86UX7     | Fermitin family homolog 3                                        | 0.18146  | 0.53008  | 1.1923  | ↑ | 0.2537 | 0.05586  | 0.537   | 0.75961  | ↓ | -0.397 |
| C9JC68     | Fetuin-B (Fragment)                                              | 0.089079 | 0.3887   | 0.59296 | ↓ | -0.754 | 0.042268 | 0.537   | 1.7505   | ↑ | 0.8077 |
| P02671     | Fibrinogen alpha chain                                           | 0.045163 | 0.29387  | 1.11    | ↑ | 0.1506 | 0.20859  | 0.82645 | 0.92245  | ↓ | -0.116 |
| C9JC84     | Fibrinogen gamma chain                                           | 0.29795  | 0.63234  | 1.1398  | ↑ | 0.1887 | 0.72099  | 0.94631 | 0.94462  | ↓ | -0.082 |
| P02751     | Fibronectin                                                      | 0.056764 | 0.3177   | 0.72304 | ↓ | -0.468 | 0.41585  | 0.87315 | 1.0752   | ↑ | 0.1046 |
| P23142     | Fibulin-1                                                        | 0.18154  | 0.53008  | 0.85935 | ↓ | -0.219 | 0.36841  | 0.82645 | 1.1499   | ↑ | 0.2015 |
| Q15485     | Ficolin-1                                                        | 0.47782  | 0.72539  | 1.4103  | ↑ | 0.496  | 0.42639  | 0.87856 | 0.67734  | ↓ | -0.562 |
| O75636     | Ficolin-3                                                        | 0.47657  | 0.72539  | 1.2633  | ↑ | 0.3372 | 0.17479  | 0.82645 | 0.48553  | ↓ | -1.042 |
| P21333     | Filamin-A                                                        | 0.15446  | 0.4903   | 1.1866  | ↑ | 0.2468 | 0.53215  | 0.89861 | 0.92406  | ↓ | -0.114 |
| P09972     | Fructose-bisphosphate aldolase C                                 | 0.012697 | 0.15675  | 1.9594  | ↑ | 0.9704 | 0.74721  | 0.96004 | 0.99502  | ↓ | -0.007 |
| Q08380     | Galectin-3-binding protein                                       | 0.058671 | 0.3177   | 0.83134 | ↓ | -0.266 | 0.05197  | 0.537   | 1.2561   | ↑ | 0.329  |
| D6RF35     | Gc-globulin                                                      | 0.61119  | 0.78415  | 0.97446 | ↓ | -0.037 | 0.48872  | 0.891   | 1.0565   | ↑ | 0.0793 |
| P06396     | Gelsolin                                                         | 0.33993  | 0.6451   | 1.0559  | ↑ | 0.0785 | 0.13314  | 0.74108 | 0.88817  | ↓ | -0.171 |
| M0QX47     | Glia maturation factor gamma                                     | 0.10653  | 0.40291  | 1.1999  | ↑ | 0.2629 | 0.35485  | 0.82645 | 0.89622  | ↓ | -0.158 |
| A0A2R8Y7X9 | GLOBIN domain-containing protein                                 | 0.46661  | 0.72539  | 0.97899 | ↓ | -0.031 | 0.53612  | 0.89861 | 2.3746   | ↑ | 1.2477 |
| P09211     | Glutathione S-transferase P                                      | 0.24186  | 0.59045  | 1.4862  | ↑ | 0.5716 | 0.84693  | 0.96004 | 0.96163  | ↓ | -0.056 |
| A0A0C4DGZ8 | Glycoprotein Ib (Platelet), alpha polypeptide                    | 0.60893  | 0.78415  | 0.8984  | ↓ | -0.155 | 0.2657   | 0.82645 | 1.5132   | ↑ | 0.5976 |
| P00739     | Haptoglobin-related protein                                      | 0.31227  | 0.63417  | 49.291  | ↑ | 5.6232 | 0.31679  | 0.82645 | 0.020057 | ↓ | -5.64  |
| G3V1N2     | HCG1745306, isoform CRA_a                                        | 0.87409  | 0.93426  | 0.9421  | ↓ | -0.086 | 0.72497  | 0.94631 | 1.408    | ↑ | 0.4937 |
| P69905     | Hemoglobin subunit alpha                                         | 0.82445  | 0.90078  | 0.9062  | ↓ | -0.142 | 0.020076 | 0.537   | 1.3722   | ↑ | 0.4565 |
| P68871     | Hemoglobin subunit beta                                          | 0.53456  | 0.75468  | 0.78029 | ↓ | -0.358 | 0.13577  | 0.7417  | 1.5083   | ↑ | 0.5929 |
| P02042     | Hemoglobin subunit delta                                         | 0.58489  | 0.77375  | 0.71604 | ↓ | -0.482 | 0.073367 | 0.58496 | 1.6686   | ↑ | 0.7386 |
| P02790     | Hemopexin                                                        | 0.00192  | 0.070812 | 1.5414  | ↑ | 0.6242 | 0.052006 | 0.537   | 0.7772   | ↓ | -0.364 |
| G3XAK1     | Hepatocyte growth factor-like protein                            | 0.12642  | 0.44931  | 1.1652  | ↑ | 0.2205 | 0.16131  | 0.80675 | 0.83902  | ↓ | -0.253 |
| P04196     | Histidine-rich glycoprotein                                      | 0.075273 | 0.36176  | 0.7864  | ↓ | -0.347 | 0.82481  | 0.96004 | 1.0361   | ↑ | 0.0512 |
| A0A087WXI2 | IgGfC-binding protein                                            | 0.92472  | 0.95717  | 0.96933 | ↓ | -0.045 | 0.74223  | 0.96004 | 1.03     | ↑ | 0.0427 |
| A0A0G2JMB2 | Immunoglobulin heavy constant alpha 2 (Fragment)                 | 0.31386  | 0.63417  | 0.57566 | ↓ | -0.797 | 0.56645  | 0.90291 | 1.1886   | ↑ | 0.2492 |
| A0A0B4J2H0 | Immunoglobulin heavy variable 1-69D                              | 0.78018  | 0.87845  | 0.95394 | ↓ | -0.068 | 0.027925 | 0.537   | 1.3974   | ↑ | 0.4828 |
| A0A075B7D8 | Immunoglobulin heavy variable 3/OR15-7 (pseudogene) (Fragment)   | 0.14251  | 0.48884  | 0.7205  | ↓ | -0.473 | 0.097294 | 0.63782 | 2.1795   | ↑ | 1.124  |
| A0A4W8ZXM2 | Immunoglobulin heavy variable 3-72                               | 0.051077 | 0.30751  | 0.6558  | ↓ | -0.609 | 0.17655  | 0.82645 | 1.3807   | ↑ | 0.4654 |
| A0A075B6R2 | Immunoglobulin heavy variable 4-4                                | 0.35186  | 0.6451   | 1.4669  | ↑ | 0.5528 | 0.70397  | 0.94631 | 0.71444  | ↓ | -0.485 |
| A0A075B6P5 | Immunoglobulin kappa variable 2-28                               | 0.56335  | 0.77375  | 0.71172 | ↓ | -0.491 | 0.32922  | 0.82645 | 1.8665   | ↑ | 0.9003 |
| A0A075B6K5 | Immunoglobulin lambda variable 3-9                               | 0.77175  | 0.87228  | 1.0583  | ↑ | 0.0818 | 0.83606  | 0.96004 | 0.98609  | ↓ | -0.02  |
| P05019     | Insulin-like growth factor I                                     | 0.12234  | 0.44555  | 1.1797  | ↑ | 0.2385 | 0.74351  | 0.96004 | 0.94989  | ↓ | -0.074 |
| P01344     | Insulin-like growth factor II                                    | 0.27652  | 0.61334  | 1.3494  | ↑ | 0.4323 | 0.31458  | 0.82645 | 0.74216  | ↓ | -0.43  |
| A6XND0     | Insulin-like growth factor-binding protein 3                     | 0.005193 | 0.12765  | 1.1966  | ↑ | 0.259  | 0.085897 | 0.63494 | 0.88712  | ↓ | -0.173 |
| P19823     | Inter-alpha-trypsin inhibitor heavy chain H2                     | 0.43661  | 0.72539  | 0.94719 | ↓ | -0.078 | 0.88597  | 0.96004 | 1.0007   | ↑ | 0.0011 |
| A0A087WW43 | Inter-alpha-trypsin inhibitor heavy chain H3                     | 0.037315 | 0.27954  | 1.166   | ↑ | 0.2216 | 0.45377  | 0.89035 | 0.93895  | ↓ | -0.091 |
| Q9NPH3     | Interleukin-1 receptor accessory protein                         | 0.10125  | 0.40261  | 0.74621 | ↓ | -0.422 | 0.27085  | 0.82645 | 1.1385   | ↑ | 0.1872 |
| P27930     | Interleukin-1 receptor type 2                                    | 0.57709  | 0.77375  | 1.1109  | ↑ | 0.1518 | 0.79787  | 0.96004 | 0.98254  | ↓ | -0.025 |
| B7ZKJ8     | ITIH4 protein                                                    | 0.000439 | 0.021583 | 1.3549  | ↑ | 0.4382 | 0.053916 | 0.537   | 0.85024  | ↓ | -0.234 |
| P29622     | Kallistatin                                                      | 0.024421 | 0.2324   | 1.2927  | ↑ | 0.3704 | 0.25743  | 0.82645 | 0.86145  | ↓ | -0.215 |
| P13647     | Keratin, type II cytoskeletal 5                                  | 0.19976  | 0.54434  | 0.81757 | ↓ | -0.291 | 0.30603  | 0.82645 | 1.0832   | ↑ | 0.1153 |
| C9JD84     | Latent-transforming growth factor beta-binding protein 1         | 0.98152  | 0.98486  | 0.99102 | ↓ | -0.013 | 0.66921  | 0.94631 | 1.0309   | ↑ | 0.0439 |
| P02750     | Leucine-rich alpha-2-glycoprotein                                | 0.021012 | 0.2117   | 1.3339  | ↑ | 0.4156 | 0.86152  | 0.96004 | 0.96186  | ↓ | -0.056 |
| A0A3B3IS95 | L-lactate dehydrogenase                                          | 0.039799 | 0.27954  | 1.4771  | ↑ | 0.5628 | 0.84618  | 0.96004 | 0.96404  | ↓ | -0.053 |
| P51884     | Lumican                                                          | 0.52232  | 0.74798  | 0.95396 | ↓ | -0.068 | 0.85971  | 0.96004 | 1.0075   | ↑ | 0.0108 |
| E9PEK4     | Macrophage colony-stimulating factor 1 receptor                  | 0.23454  | 0.59045  | 0.59592 | ↓ | -0.747 | 0.89313  | 0.96004 | 1.007    | ↑ | 0.01   |
| P48740     | Mannan-binding lectin serine protease 1                          | 0.074582 | 0.36176  | 1.0914  | ↑ | 0.1262 | 0.57235  | 0.90291 | 0.96782  | ↓ | -0.047 |
| O00187     | Mannan-binding lectin serine protease 2                          | 0.205461 | 0.54722  | 1.1172  | ↑ | 0.1598 | 0.65992  | 0.94631 | 0.9606   | ↓ | -0.058 |
| P33908     | Mannosyl-oligosaccharide 1,2-alpha-mannosidase IA                | 0.32825  | 0.6451   | 1.2381  | ↑ | 0.3081 | 0.41062  | 0.87315 | 0.81646  | ↓ | -0.293 |
| Q16853     | Membrane primary amine oxidase                                   | 0.042048 | 0.28847  | 0.7737  | ↓ | -0.37  | 0.78802  | 0.96004 | 1.0486   | ↑ | 0.0684 |
| P03971     | Muellerian-inhibiting factor                                     | 0.16708  | 0.50282  | 0.8415  | ↓ | -0.249 | 0.95089  | 0.98426 | 1.0129   | ↑ | 0.0185 |
| Q7Z7M0     | Multiple epidermal growth factor-like domains protein 8          | 0.26589  | 0.6104   | 1.1134  | ↑ | 0.1549 | 0.69975  | 0.94631 | 0.95238  | ↓ | -0.07  |
| P05164     | Myeloperoxidase                                                  | 0.059288 | 0.3177   | 1.504   | ↑ | 0.5888 | 0.61015  | 0.92305 | 0.91751  | ↓ | -0.124 |
| P12882     | Myosin-1                                                         | 0.010512 | 0.15675  | 1.7944  | ↑ | 0.8435 | 0.031776 | 0.537   | 0.61588  | ↓ | -0.699 |
| P35579     | Myosin-9                                                         | 0.74792  | 0.85952  | 0.98134 | ↓ | -0.027 | 0.52724  | 0.89861 | 1.0344   | ↑ | 0.0488 |
| Q96PD5     | N-acetylmuramoyl-L-alanine amidase                               | 0.83832  | 0.90588  | 0.91421 | ↓ | -0.129 | 0.28917  | 0.82645 | 1.2602   | ↑ | 0.3337 |
| Q15223     | Nectin-1                                                         | 0.47319  | 0.72539  | 1.5019  | ↑ | 0.5868 | 0.058251 | 0.537   | 0.43727  | ↓ | -1.193 |
| A0A087WTE4 | Neural cell adhesion molecule 1                                  | 0.45735  | 0.72539  | 1.1048  | ↑ | 0.1438 | 0.21337  | 0.82645 | 0.84072  | ↓ | -0.25  |
| P04746     | Pancreatic alpha-amylase                                         | 0.048616 | 0.29878  | 1.2685  | ↑ | 0.3432 | 0.3063   | 0.82645 | 0.8696   | ↓ | -0.202 |
| O95497     | Pantetheinase                                                    | 0.89389  | 0.94585  | 0.97974 | ↓ | -0.03  | 0.27453  | 0.82645 | 1.2306   | ↑ | 0.2994 |
| A0A1B0GU03 | Peptidase A1 domain-containing protein                           | 0.30438  | 0.63234  | 1.2445  | ↑ | 0.3156 | 0.49118  | 0.891   | 0.87774  | ↓ | -0.188 |
| P62937     | Peptidyl-prolyl cis-trans isomerase A                            | 0.69345  | 0.83768  | 1.1699  | ↑ | 0.2264 | 0.95901  | 0.98627 | 0.98002  | ↓ | -0.029 |
| A0A0A0MRQ5 | Peroxiredoxin-1                                                  | 0.3411   | 0.6451   | 0.88897 | ↓ | -0.17  | 0.3077   | 0.82645 | 1.5235   | ↑ | 0.6074 |
| P30041     | Peroxiredoxin-6                                                  | 0.23823  | 0.59045  | 1.6638  | ↑ | 0.7345 | 0.59771  | 0.92014 | 0.89094  | ↓ | -0.167 |
| P80108     | Phosphatidylinositol-glycan-specific phospholipase D             | 0.15374  | 0.4903   | 0.87534 | ↓ | -0.192 | 0.049097 | 0.537   | 1.1607   | ↑ | 0.215  |
| P18669     | Phosphoglycerate mutase 1                                        | 0.045824 | 0.29387  | 1.956   | ↑ | 0.9679 | 0.81849  | 0.96004 | 0.93104  | ↓ | -0.103 |
| P55058     | Phospholipid transfer protein                                    | 0.69319  | 0.83768  | 1.0752  | ↑ | 0.1046 | 0.93954  | 0.98211 | 0.9669   | ↓ | -0.049 |
| P36955     | Pigment epithelium-derived factor                                | 0.16098  | 0.49335  | 0.90337 | ↓ | -0.147 | 0.36082  | 0.82645 | 1.0844   | ↑ | 0.1169 |
| H0YAC1     | Plasma kallikrein (Fragment)                                     | 0.30756  | 0.63417  | 0.95529 | ↓ | -0.066 | 0.60511  | 0.92014 | 1.0348   | ↑ | 0.0494 |
| A0A7I2V2D2 | Plasma protease C1 inhibitor                                     | 0.37612  | 0.6644   | 1.0922  | ↑ | 0.1273 | 0.60383  | 0.92014 | 0.93586  | ↓ | -0.096 |
| P00747     | Plasminogen                                                      | 0.031981 | 0.26933  | 1.1153  | ↑ | 0.1575 | 0.37894  | 0.84051 | 0.94793  | ↓ | -0.077 |



|            |                                                            |          |          |         |   |        |          |         |         |   |        |
|------------|------------------------------------------------------------|----------|----------|---------|---|--------|----------|---------|---------|---|--------|
| P13796     | Plastin-2                                                  | 0.007061 | 0.1356   | 1.2321  | ↑ | 0.3011 | 0.048289 | 0.537   | 0.83065 | ↓ | -0.268 |
| P02775     | Platelet basic protein                                     | 0.00427  | 0.11451  | 0.4326  | ↓ | -1.209 | 0.027004 | 0.537   | 2.3727  | ↑ | 1.2465 |
| P02776     | Platelet factor 4                                          | 0.61351  | 0.78415  | 0.85681 | ↓ | -0.223 | 0.2362   | 0.82645 | 1.5042  | ↑ | 0.589  |
| P08567     | Pleckstrin                                                 | 0.28973  | 0.62387  | 1.3757  | ↑ | 0.4602 | 0.3153   | 0.82645 | 0.73745 | ↓ | -0.439 |
| P20742     | Pregnancy zone protein                                     | 0.10211  | 0.40261  | 0.84541 | ↓ | -0.242 | 0.31472  | 0.82645 | 1.1118  | ↑ | 0.1529 |
| F8W8W4     | Prenylcysteine oxidase 1                                   | 0.46413  | 0.72539  | 0.93732 | ↓ | -0.093 | 0.017354 | 0.537   | 1.2744  | ↑ | 0.3498 |
| Q15113     | Procollagen C-endopeptidase enhancer 1                     | 0.060309 | 0.3177   | 0.58211 | ↓ | -0.781 | 0.24359  | 0.82645 | 1.4898  | ↑ | 0.5752 |
| P07737     | Profilin-1                                                 | 0.40974  | 0.69869  | 1.4601  | ↑ | 0.5461 | 0.77134  | 0.96004 | 0.84686 | ↓ | -0.24  |
| P12273     | Prolactin-inducible protein                                | 0.81031  | 0.89652  | 1.8318  | ↑ | 0.8733 | 0.92078  | 0.96665 | 0.55474 | ↓ | -0.85  |
| P05109     | Protein S100-A8                                            | 0.57722  | 0.77375  | 1.1407  | ↑ | 0.1899 | 0.89904  | 0.96004 | 0.99047 | ↓ | -0.014 |
| P06702     | Protein S100-A9                                            | 0.097332 | 0.40261  | 1.9205  | ↑ | 0.9415 | 0.84696  | 0.96004 | 0.95228 | ↓ | -0.071 |
| G3V2W1     | Protein Z-dependent protease inhibitor                     | 0.10237  | 0.40261  | 0.89201 | ↓ | -0.165 | 0.49388  | 0.891   | 1.078   | ↑ | 0.1083 |
| Q92954     | Proteoglycan 4                                             | 0.12448  | 0.44784  | 1.2327  | ↑ | 0.3018 | 0.087464 | 0.63494 | 0.77577 | ↓ | -0.366 |
| Q9NPG4     | Protocadherin-12                                           | 0.31186  | 0.63417  | 1.1622  | ↑ | 0.2169 | 0.50176  | 0.89168 | 0.88632 | ↓ | -0.174 |
| Q16609     | Putative apolipoprotein(a)-like protein 2                  | 0.83665  | 0.90588  | 0.87359 | ↓ | -0.195 | 0.39844  | 0.87066 | 1.4809  | ↑ | 0.5665 |
| Q6ZMU1     | Putative protein C3P1                                      | 0.30381  | 0.63234  | 1.1201  | ↑ | 0.1637 | 0.47069  | 0.891   | 0.88351 | ↓ | -0.179 |
| Q6UXR4     | Putative serpin A13                                        | 0.23763  | 0.59045  | 0.72941 | ↓ | -0.455 | 0.10466  | 0.6604  | 1.3889  | ↑ | 0.474  |
| A0A804F6T5 | Pyruvate kinase PKM                                        | 0.45879  | 0.72539  | 0.95232 | ↓ | -0.07  | 0.027531 | 0.537   | 1.1882  | ↑ | 0.2488 |
| A6NIZ1     | Ras-related protein Rap-1b-like protein                    | 0.83816  | 0.90588  | 0.915   | ↓ | -0.128 | 0.22845  | 0.82645 | 1.2969  | ↑ | 0.375  |
| P23470     | Receptor-type tyrosine-phosphatase gamma                   | 0.28575  | 0.62387  | 1.2543  | ↑ | 0.3268 | 0.1498   | 0.7891  | 0.71209 | ↓ | -0.49  |
| P02753     | Retinol-binding protein 4                                  | 0.91543  | 0.95424  | 0.99111 | ↓ | -0.013 | 0.81908  | 0.96004 | 1.0206  | ↑ | 0.0294 |
| O95980     | Reversion-inducing cysteine-rich protein with Kazal motifs | 0.49374  | 0.73876  | 0.87204 | ↓ | -0.198 | 0.51536  | 0.89861 | 1.1003  | ↑ | 0.1379 |
| A0A096LPE2 | SAA2-SAA4 readthrough                                      | 5.75E-05 | 0.016678 | 3.2845  | ↑ | 1.7157 | 0.40274  | 0.87315 | 0.95322 | ↓ | -0.069 |
| C9JHR8     | Scavenger receptor cysteine-rich type 1 protein M130       | 0.9079   | 0.95314  | 0.98009 | ↓ | -0.029 | 0.98719  | 0.99209 | 1.0062  | ↑ | 0.0089 |
| A0A182DWH7 | Selenoprotein P (Fragment)                                 | 0.86184  | 0.92452  | 1.0102  | ↑ | 0.0146 | 0.49534  | 0.891   | 0.69416 | ↓ | -0.527 |
| P02787     | Serotransferrin                                            | 0.021528 | 0.2117   | 0.77147 | ↓ | -0.374 | 0.33374  | 0.82645 | 1.1121  | ↑ | 0.1534 |
| P02743     | Serum amyloid P-component                                  | 0.008528 | 0.13976  | 1.5249  | ↑ | 0.6088 | 0.043346 | 0.537   | 0.55509 | ↓ | -0.849 |
| A0A0C4DGN2 | Sex hormone-binding globulin (Fragment)                    | 0.027258 | 0.25128  | 0.84394 | ↓ | -0.245 | 0.21541  | 0.82645 | 1.2371  | ↑ | 0.307  |
| P09486     | SPARC                                                      | 0.8136   | 0.89652  | 0.92653 | ↓ | -0.11  | 0.30764  | 0.82645 | 1.2009  | ↑ | 0.2641 |
| O00391     | Sulfhydryl oxidase 1                                       | 0.59714  | 0.78049  | 0.94243 | ↓ | -0.086 | 0.045816 | 0.537   | 1.2556  | ↑ | 0.3284 |
| Q9Y490     | Talin-1                                                    | 0.37549  | 0.6644   | 1.0804  | ↑ | 0.1116 | 0.95952  | 0.98627 | 0.98711 | ↓ | -0.019 |
| A0A087WXC4 | Tenascin-N                                                 | 0.011731 | 0.15675  | 3.2996  | ↑ | 1.7223 | 0.030798 | 0.537   | 0.39026 | ↓ | -1.358 |
| E9PHK0     | Tetranectin                                                | 0.15781  | 0.4903   | 1.08    | ↑ | 0.1111 | 0.88164  | 0.96004 | 0.99541 | ↓ | -0.007 |
| P07996     | Thrombospondin-1                                           | 0.68869  | 0.83768  | 0.97179 | ↓ | -0.041 | 0.83391  | 0.96004 | 1.0268  | ↑ | 0.0381 |
| E7ES19     | Thrombospondin-4                                           | 0.66091  | 0.82217  | 0.98125 | ↓ | -0.027 | 0.77505  | 0.96004 | 1.0351  | ↑ | 0.0498 |
| P62328     | Thymosin beta-4                                            | 0.084738 | 0.3887   | 1.3843  | ↑ | 0.4691 | 0.45728  | 0.89035 | 0.91704 | ↓ | -0.125 |
| P05543     | Thyroxine-binding globulin                                 | 0.036531 | 0.27954  | 1.3291  | ↑ | 0.4104 | 0.33056  | 0.82645 | 0.85403 | ↓ | -0.228 |
| F2Z393     | Transaldolase                                              | 0.096687 | 0.40261  | 1.2172  | ↑ | 0.2835 | 0.19255  | 0.82645 | 0.84716 | ↓ | -0.239 |
| Q15582     | Transforming growth factor-beta-induced protein ig-h3      | 0.23701  | 0.59045  | 0.87279 | ↓ | -0.196 | 0.28934  | 0.82645 | 1.0947  | ↑ | 0.1306 |
| P37802     | Transgelin-2                                               | 0.045254 | 0.29387  | 1.2923  | ↑ | 0.3699 | 0.56926  | 0.90291 | 0.96211 | ↓ | -0.056 |
| A0A087WT59 | Transthyretin                                              | 0.018913 | 0.20181  | 2.4093  | ↑ | 1.2686 | 0.18779  | 0.82645 | 0.71731 | ↓ | -0.479 |
| P60174     | Triosephosphate isomerase                                  | 0.41641  | 0.70597  | 1.2894  | ↑ | 0.3667 | 0.3698   | 0.82645 | 0.75669 | ↓ | -0.402 |
| P67936     | Tropomyosin alpha-4 chain                                  | 0.78492  | 0.88042  | 0.96028 | ↓ | -0.058 | 0.27119  | 0.82645 | 1.3313  | ↑ | 0.4129 |
| P68363     | Tubulin alpha-1B chain                                     | 0.34704  | 0.6451   | 1.1672  | ↑ | 0.2231 | 0.29664  | 0.82645 | 0.82922 | ↓ | -0.27  |
| P68366     | Tubulin alpha-4A chain                                     | 0.28799  | 0.62387  | 1.2913  | ↑ | 0.3689 | 0.23371  | 0.82645 | 0.68746 | ↓ | -0.541 |
| Q9H4B7     | Tubulin beta-1 chain                                       | 0.53467  | 0.75468  | 1.0806  | ↑ | 0.1118 | 0.89956  | 0.96004 | 0.97546 | ↓ | -0.036 |
| Q6EMK4     | Vasorin                                                    | 0.71109  | 0.8386   | 0.89738 | ↓ | -0.156 | 0.55984  | 0.90291 | 1.2503  | ↑ | 0.3222 |
| P18206     | Vinculin                                                   | 0.4572   | 0.72539  | 1.0931  | ↑ | 0.1284 | 0.18081  | 0.82645 | 0.84929 | ↓ | -0.236 |
| E7END6     | Vitamin K-dependent protein C                              | 0.39369  | 0.68701  | 0.87512 | ↓ | -0.192 | 0.16135  | 0.80675 | 1.2243  | ↑ | 0.2919 |
| A0A0S2Z4L3 | Vitamin K-dependent protein S (Fragment)                   | 0.14963  | 0.4903   | 1.1077  | ↑ | 0.1476 | 0.42013  | 0.87315 | 0.93172 | ↓ | -0.102 |
| P04004     | Vitronectin                                                | 0.97461  | 0.98486  | 0.99305 | ↓ | -0.01  | 0.32857  | 0.82645 | 1.1819  | ↑ | 0.2411 |
| P25311     | Zinc-alpha-2-glycoprotein                                  | 0.25879  | 0.60112  | 1.0879  | ↑ | 0.1215 | 0.56818  | 0.90291 | 0.94991 | ↓ | -0.074 |





|            |                                                            |          |          |         |          |          |         |         |          |
|------------|------------------------------------------------------------|----------|----------|---------|----------|----------|---------|---------|----------|
| Q6ZMU1     | Putative protein C3P1                                      | 0.38614  | 0.72096  | 0.83821 | ↓ -0.255 | 0.041311 | 0.66929 | 1.5254  | ↑ 0.6092 |
| Q6UXR4     | Putative serpin A13                                        | 0.46119  | 0.77301  | 1.1648  | ↑ 0.2201 | 0.79239  | 0.94637 | 0.90194 | ↓ -0.149 |
| A0A804F6T5 | Pyruvate kinase PKM                                        | 0.040869 | 0.25762  | 0.86567 | ↓ -0.208 | 0.19265  | 0.66929 | 1.1578  | ↑ 0.2114 |
| P23470     | Receptor-type tyrosine-protein phosphatase gamma           | 0.60841  | 0.81782  | 1.1248  | ↑ 0.1697 | 0.49671  | 0.88805 | 0.83102 | ↓ -0.267 |
| P02753     | Retinol-binding protein 4                                  | 0.11348  | 0.40334  | 1.1062  | ↑ 0.1456 | 0.02777  | 0.66929 | 0.82455 | ↓ -0.278 |
| O95980     | Reversion-inducing cysteine-rich protein with Kazal motifs | 0.56595  | 0.80326  | 0.89341 | ↓ -0.163 | 0.34258  | 0.74957 | 1.178   | ↑ 0.2364 |
| J3KRE2     | Rho GDP-dissociation inhibitor 1                           | 0.057147 | 0.28425  | 1.4075  | ↑ 0.4931 | 0.19087  | 0.66929 | 0.76472 | ↓ -0.387 |
| P02787     | Serotransferrin                                            | 0.23699  | 0.59249  | 0.89456 | ↓ -0.161 | 0.19805  | 0.66929 | 1.1277  | ↑ 0.1734 |
| A0A0C4DGN2 | Sex hormone-binding globulin (Fragment)                    | 0.98541  | 0.99463  | 1.0126  | ↑ 0.0181 | 0.391    | 0.81204 | 0.88882 | ↓ -0.17  |
| P09486     | SPARC                                                      | 0.25812  | 0.62407  | 1.274   | ↑ 0.3493 | 0.51647  | 0.9012  | 0.79402 | ↓ -0.333 |
| O00391     | Sulphydryl oxidase 1                                       | 0.004037 | 0.085069 | 0.77148 | ↓ -0.374 | 0.24391  | 0.73444 | 1.1274  | ↑ 0.1731 |
| Q9Y490     | Talin-1                                                    | 0.57348  | 0.80326  | 1.0364  | ↑ 0.0516 | 0.20109  | 0.66929 | 0.91374 | ↓ -0.13  |
| A0A087WXC4 | Tenascin-N                                                 | 0.008641 | 0.13121  | 1.5042  | ↑ 0.589  | 0.0116   | 0.57034 | 0.48947 | ↓ -1.031 |
| E9PHK0     | Tetranectin                                                | 0.17082  | 0.50233  | 0.91338 | ↓ -0.131 | 0.90386  | 0.97704 | 1.0626  | ↑ 0.0876 |
| P07996     | Thrombospondin-1                                           | 0.39917  | 0.72478  | 0.94043 | ↓ -0.089 | 0.63661  | 0.92    | 1.0452  | ↑ 0.0637 |
| E7ES19     | Thrombospondin-4                                           | 0.42387  | 0.73678  | 0.83044 | ↓ -0.268 | 0.19204  | 0.66929 | 1.2182  | ↑ 0.2847 |
| P62328     | Thymosin beta-4                                            | 0.008896 | 0.13121  | 1.564   | ↑ 0.6452 | 0.18029  | 0.66929 | 0.77932 | ↓ -0.36  |
| F2Z393     | Transaldolase                                              | 0.015433 | 0.17669  | 1.1849  | ↑ 0.2448 | 0.72616  | 0.93138 | 0.97643 | ↓ -0.034 |
| Q15582     | Transforming growth factor-beta-induced protein ig-h3      | 0.045986 | 0.26353  | 0.81123 | ↓ -0.302 | 0.99255  | 0.99473 | 1.0156  | ↑ 0.0224 |
| P37802     | Transgelin-2                                               | 0.031907 | 0.24135  | 1.4242  | ↑ 0.5102 | 0.22052  | 0.71487 | 0.80909 | ↓ -0.306 |
| O43280     | Trehalase                                                  | 0.33954  | 0.68606  | 0.61454 | ↓ -0.702 | 0.47991  | 0.87181 | 1.5832  | ↑ 0.6628 |
| P60174     | Triosephosphate isomerase                                  | 0.32691  | 0.68395  | 1.0477  | ↑ 0.0673 | 0.20192  | 0.66929 | 0.83407 | ↓ -0.262 |
| P67936     | Tropomyosin alpha-4 chain                                  | 0.069636 | 0.30661  | 0.84557 | ↓ -0.242 | 0.26826  | 0.73444 | 1.1312  | ↑ 0.1779 |
| P68363     | Tubulin alpha-1B chain                                     | 0.67111  | 0.83675  | 0.95717 | ↓ -0.063 | 0.25177  | 0.73444 | 1.2918  | ↑ 0.3694 |
| P68366     | Tubulin alpha-4A chain                                     | 0.64135  | 0.81962  | 0.86586 | ↓ -0.208 | 0.71807  | 0.93138 | 1.0915  | ↑ 0.1263 |
| Q9H4B7     | Tubulin beta-1 chain                                       | 0.45529  | 0.7675   | 1.0658  | ↑ 0.0919 | 0.69095  | 0.93138 | 0.95806 | ↓ -0.062 |
| Q6EMK4     | Vasorin                                                    | 0.29221  | 0.6433   | 0.78376 | ↓ -0.352 | 0.71026  | 0.93138 | 1.1021  | ↑ 0.1402 |
| A0A7I2V2Y2 | Vesicle-fusing ATPase                                      | 0.80692  | 0.89489  | 1.3782  | ↑ 0.4628 | 0.71398  | 0.93138 | 0.53639 | ↓ -0.899 |
| P18206     | Vinculin                                                   | 0.70232  | 0.84943  | 1.0131  | ↑ 0.0188 | 0.9208   | 0.97704 | 0.99739 | ↓ -0.004 |
| P22891     | Vitamin K-dependent protein Z                              | 0.77046  | 0.88106  | 1.0499  | ↑ 0.0702 | 0.7841   | 0.94412 | 0.91644 | ↓ -0.126 |
| Q7Z5L0     | Vitellogenin outer layer protein 1 homolog                 | 0.98737  | 0.99463  | 1.0057  | ↑ 0.0082 | 0.23646  | 0.72733 | 0.64968 | ↓ -0.622 |
| P04004     | Vitronectin                                                | 0.37227  | 0.70911  | 1.129   | ↑ 0.175  | 0.077263 | 0.66929 | 0.74675 | ↓ -0.421 |
| P04275     | von Willebrand factor                                      | 0.83757  | 0.90839  | 0.98888 | ↓ -0.016 | 0.7432   | 0.93641 | 1.0216  | ↑ 0.0308 |
| O75083     | WD repeat-containing protein 1                             | 0.32391  | 0.68395  | 0.88935 | ↓ -0.169 | 0.56028  | 0.9012  | 1.095   | ↑ 0.1309 |
| P25311     | Zinc-alpha-2-glycoprotein                                  | 0.56046  | 0.80326  | 1.0621  | ↑ 0.0869 | 0.46251  | 0.85812 | 0.91709 | ↓ -0.125 |

**Supplementary Table 5.** A comprehensive list of proteins that are less altered by radiation at 96 h when compared to baseline values due to the administration of Ex-Rad II (administered at 48 and 60 h post-irradiation).

| UniProtKB  | ProteinNames                                            | 96 Hour vs. Pre |          |           | 96 Hour ExRad II vs. Vehicle |          |           |
|------------|---------------------------------------------------------|-----------------|----------|-----------|------------------------------|----------|-----------|
|            |                                                         | p-value         | FDR      | FC        | p-value                      | FDR      | FC        |
| P61981     | 14-3-3 protein gamma                                    | 0.27831         | 0.63645  | 1.1595 ↑  | 0.2135                       | 0.19793  | 0.63792 ↓ |
| P63104     | 14-3-3 protein zeta/delta                               | 0.62087         | 0.81782  | 0.96659 ↓ | -0.049                       | 0.39524  | 1.1449 ↑  |
| A0A2R8Y6G6 | 2-phospho-D-glycerate hydro-lyase                       | 0.04261         | 0.25762  | 1.2338 ↑  | 0.3031                       | 0.000126 | 0.020716  |
| P08253     | 72 kDa type IV collagenase                              | 0.18274         | 0.52338  | 1.1707 ↑  | 0.2274                       | 0.50197  | 0.81601   |
| A0A7P0TAI0 | 78 kDa glucose-regulated protein                        | 0.14719         | 0.45706  | 0.87213 ↓ | -0.197                       | 0.080152 | 0.35291   |
| Q92484     | Acid sphingomyelinase-like phosphodiesterase 3a         | 0.040109        | 0.25762  | 0.746 ↓   | -0.423                       | 0.00247  | 0.064114  |
| P68032     | Actin, alpha cardiac muscle 1                           | 0.51825         | 0.79214  | 0.84483 ↓ | -0.243                       | 0.040777 | 0.30631   |
| I3L4N8     | Actin, cytoplasmic 2                                    | 0.20193         | 0.55225  | 0.85455 ↓ | -0.227                       | 0.20223  | 0.54733   |
| Q15848     | Adiponectin                                             | 0.71355         | 0.85457  | 1.0781 ↑  | 0.1085                       | 0.59855  | 0.84351   |
| K7ERG9     | Adipsin                                                 | 0.28118         | 0.63806  | 0.90291 ↓ | -0.147                       | 0.036015 | 0.30356   |
| P43652     | Afamin                                                  | 0.12431         | 0.43144  | 1.0677 ↑  | 0.0945                       | 0.002076 | 0.061229  |
| P02763     | Alpha-1-acid glycoprotein 1                             | 0.07961         | 0.32618  | 1.7532 ↑  | 0.81                         | 0.64399  | 0.86256   |
| A0A024R617 | Alpha-1-antitrypsin                                     | 0.07961         | 0.32618  | 1.7532 ↑  | 0.81                         | 0.64399  | 0.86256   |
| C9JV77     | Alpha-2-HS-glycoprotein                                 | 0.16831         | 0.50233  | 0.77902 ↓ | -0.36                        | 0.38916  | 0.72577   |
| P01023     | Alpha-2-macroglobulin                                   | 0.21487         | 0.57106  | 0.92226 ↓ | -0.117                       | 0.25027  | 0.59722   |
| A0A7I2V4Y4 | Alpha-actinin-1                                         | 0.078518        | 0.32618  | 0.84787 ↓ | -0.238                       | 0.10358  | 0.39524   |
| P54802     | Alpha-N-acetylglucosaminidase                           | 0.39005         | 0.72368  | 0.92453 ↓ | -0.113                       | 0.38737  | 0.72577   |
| A0A0A0MSN4 | Angiotensin-converting enzyme                           | 0.069371        | 0.30661  | 0.79532 ↓ | -0.33                        | 0.63929  | 0.86256   |
| P04083     | Annexin A1                                              | 0.82741         | 0.90778  | 0.88954 ↓ | -0.169                       | 0.11523  | 0.3999    |
| P01008     | Antithrombin-III                                        | 0.38134         | 0.71652  | 0.9233 ↓  | -0.115                       | 0.34909  | 0.68512   |
| F8W696     | Apolipoprotein A-I                                      | 0.13382         | 0.44356  | 0.87666 ↓ | -0.19                        | 0.12737  | 0.42515   |
| P06727     | Apolipoprotein A-IV                                     | 0.014905        | 0.17669  | 0.85459 ↓ | -0.227                       | 0.98344  | 0.99362   |
| P04114     | Apolipoprotein B-100                                    | 0.88328         | 0.94484  | 0.98749 ↓ | -0.018                       | 0.002618 | 0.064114  |
| K7ER74     | Apolipoprotein C-II                                     | 0.1912          | 0.53718  | 1.6269 ↑  | 0.7021                       | 0.35019  | 0.68512   |
| B0Y1W2     | Apolipoprotein C-III                                    | 0.94333         | 0.97643  | 0.99296 ↓ | -0.01                        | 0.57223  | 0.84351   |
| P08519     | Apolipoprotein(a)                                       | 0.33636         | 0.68606  | 1.0487 ↑  | 0.0686                       | 0.024637 | 0.24227   |
| P02749     | Beta-2-glycoprotein 1                                   | 0.36476         | 0.70792  | 0.94879 ↓ | -0.076                       | 0.020566 | 0.23334   |
| P43251     | Biotinidase                                             | 0.77487         | 0.88106  | 0.98896 ↓ | -0.016                       | 0.849    | 0.94512   |
| Q9UBW5     | Bridging integrator 2                                   | 0.3264          | 0.68395  | 1.0113 ↑  | 0.0162                       | 0.58963  | 0.84351   |
| B4E1Z4     | C3/C5 convertase                                        | 0.019621        | 0.17881  | 1.1399 ↑  | 0.1888                       | 0.78479  | 0.92247   |
| P04003     | C4b-binding protein alpha chain                         | 0.019037        | 0.17881  | 1.1278 ↑  | 0.1736                       | 0.053632 | 0.33537   |
| P20851     | C4b-binding protein beta chain                          | 0.77378         | 0.88106  | 0.94984 ↓ | -0.074                       | 0.44226  | 0.76431   |
| H3BNC6     | Cadherin-1                                              | 0.71552         | 0.85457  | 1.0517 ↑  | 0.0728                       | 0.92941  | 0.99362   |
| P55290     | Cadherin-13                                             | 0.020003        | 0.17881  | 0.6702 ↓  | -0.577                       | 0.011756 | 0.18253   |
| P33151     | Cadherin-5                                              | 0.17535         | 0.50714  | 1.3922 ↑  | 0.4773                       | 0.16621  | 0.49031   |
| Q9NZT1     | Calmodulin-like protein 5                               | 0.9696          | 0.99299  | 0.51202 ↓ | -0.966                       | 0.72519  | 0.90649   |
| E5RFL2     | Carbonate dehydratase I (Fragment)                      | 0.53077         | 0.79432  | 0.96282 ↓ | -0.055                       | 0.23499  | 0.59722   |
| P00918     | Carbonic anhydrase 2                                    | 0.73764         | 0.86009  | 0.91983 ↓ | -0.121                       | 0.070511 | 0.34857   |
| A0A087WSY5 | Carboxypeptidase B2                                     | 0.10674         | 0.39857  | 1.1369 ↑  | 0.1851                       | 0.00014  | 0.020716  |
| P15169     | Carboxypeptidase N catalytic chain                      | 0.094724        | 0.37133  | 0.82846 ↓ | -0.271                       | 0.052298 | 0.33537   |
| P22792     | Carboxypeptidase N subunit 2                            | 0.84245         | 0.91034  | 1.1097 ↑  | 0.1502                       | 0.33528  | 0.67745   |
| A0A0C4DFP6 | Cartilage acidic protein 1                              | 0.034785        | 0.25028  | 0.86838 ↓ | -0.204                       | 0.044583 | 0.31314   |
| G3XAP6     | Cartilage oligomeric matrix protein                     | 0.14317         | 0.44939  | 0.82863 ↓ | -0.271                       | 0.35557  | 0.68557   |
| P04040     | Catalase                                                | 0.050264        | 0.26962  | 1.1656 ↑  | 0.221                        | 0.048194 | 0.32312   |
| A0A7P0T8I6 | Cathepsin X                                             | 0.001509        | 0.048361 | 0.49216 ↓ | -1.023                       | 0.045989 | 0.31551   |
| P11717     | Cation-independent mannose-6-phosphate receptor         | 0.99634         | 0.99973  | 1.0116 ↑  | 0.0167                       | 0.64455  | 0.86256   |
| Q6YHK3     | CD109 antigen                                           | 0.054471        | 0.28425  | 0.83933 ↓ | -0.253                       | 0.034633 | 0.30356   |
| H0Y2P0     | CD44 antigen (Fragment)                                 | 0.47269         | 0.77325  | 1.369 ↑   | 0.4531                       | 0.8457   | 0.945     |
| O00299     | Chloride intracellular channel protein 1                | 0.32486         | 0.68395  | 0.87034 ↓ | -0.2                         | 0.04008  | 0.30631   |
| P06276     | Cholinesterase                                          | 0.10661         | 0.39857  | 0.71838 ↓ | -0.477                       | 0.13374  | 0.43354   |
| P08861     | Chymotrypsin-like elastase family member 3B             | 0.5042          | 0.7829   | 1.1684 ↑  | 0.2245                       | 0.035141 | 0.30356   |
| P10909     | Clusterin                                               | 0.39935         | 0.72478  | 0.92759 ↓ | -0.108                       | 0.18469  | 0.52896   |
| Q14019     | Coactosin-like protein                                  | 0.78676         | 0.88585  | 1.0042 ↑  | 0.0061                       | 0.22916  | 0.59297   |
| P00740     | Coagulation factor IX                                   | 0.59541         | 0.81318  | 0.94501 ↓ | -0.082                       | 0.1045   | 0.39524   |
| F5H8B0     | Coagulation factor VII                                  | 0.004022        | 0.085069 | 1.4578 ↑  | 0.5438                       | 0.002825 | 0.064114  |
| P03951     | Coagulation factor XI                                   | 0.40047         | 0.72478  | 1.052 ↑   | 0.0732                       | 0.1957   | 0.54299   |
| P00748     | Coagulation factor XII                                  | 0.078952        | 0.32618  | 0.85982 ↓ | -0.218                       | 0.076803 | 0.34857   |
| P00488     | Coagulation factor XIII A chain                         | 0.26162         | 0.62407  | 0.86464 ↓ | -0.21                        | 0.27154  | 0.60228   |
| P05160     | Coagulation factor XIII B chain                         | 0.58528         | 0.80681  | 0.95565 ↓ | -0.065                       | 0.3961   | 0.72577   |
| O00748     | Cocaine esterase                                        | 0.60406         | 0.81782  | 1.9127 ↑  | 0.9356                       | 0.41528  | 0.74247   |
| E9PP50     | Cofilin, non-muscle isoform (Fragment)                  | 0.24214         | 0.60026  | 2.3053 ↑  | 1.205                        | 0.05149  | 0.33537   |
| P02745     | Complement C1q subcomponent subunit A                   | 0.54865         | 0.80326  | 1.2059 ↑  | 0.2701                       | 0.44184  | 0.76431   |
| H0YFL7     | Complement C1r subcomponent-like protein (Fragment)     | 0.71104         | 0.85457  | 1.2146 ↑  | 0.2805                       | 0.52398  | 0.82671   |
| A0A087X232 | Complement C1s subcomponent                             | 0.83393         | 0.90778  | 0.98379 ↓ | -0.024                       | 0.99679  | 0.99679   |
| P06681     | Complement C2                                           | 0.0062248       | 0.10802  | 1.421 ↑   | 0.5069                       | 0.079074 | 0.35291   |
| P0C0L4     | Complement C4-A                                         | 5.1451E-06      | 0.00054  | 1.3032 ↑  | 0.3821                       | 0.1956   | 0.54299   |
| P0C0L5     | Complement C4-B                                         | 0.01266         | 0.16989  | 1.3967 ↑  | 0.482                        | 0.020513 | 0.23334   |
| F5GY80     | Complement component 8 subunit beta                     | 0.10011         | 0.38352  | 1.102 ↑   | 0.1402                       | 0.50284  | 0.81601   |
| P10643     | Complement component C7                                 | 0.40794         | 0.72935  | 0.94582 ↓ | -0.08                        | 0.17698  | 0.51185   |
| A0A0C4DGF5 | Complement component receptor 1-like protein (Fragment) | 0.23152         | 0.58376  | 0.73528 ↓ | -0.444                       | 0.45747  | 0.78008   |
| Q9BXR6     | Complement factor H-related protein 5                   | 0.29115         | 0.6433   | 1.4445 ↑  | 0.5306                       | 0.53979  | 0.83687   |
| E9PDY4     | Complement receptor type 1                              | 0.046354        | 0.26353  | 0.76318 ↓ | -0.39                        | 0.000731 | 0.053441  |
| A0A3B3ISR2 | Complement subcomponent C1r                             | 0.70208         | 0.84943  | 0.98116 ↓ | -0.027                       | 0.39966  | 0.72777   |
| B4E3S0     | Coronin                                                 | 0.0016393       | 0.048361 | 0.6496 ↓  | -0.622                       | 0.001119 | 0.054614  |
| P31146     | Coronin-1A                                              | 0.83006         | 0.90778  | 0.99577 ↓ | -0.006                       | 0.16545  | 0.49031   |
| P08185     | Corticosteroid-binding globulin                         | 0.56898         | 0.80326  | 1.1834 ↑  | 0.2429                       | 0.5497   | 0.84109   |
| P02741     | C-reactive protein                                      | 0.16956         | 0.50233  | 1.1802 ↑  | 0.239                        | 0.24544  | 0.59722   |
| P32320     | Cytidine deaminase                                      | 0.048472        | 0.26962  | 0.65622 ↓ | -0.608                       | 0.40519  | 0.73332   |
| Q02413     | Desmoglein-1                                            | 0.083523        | 0.33752  | 0.67286 ↓ | -0.572                       | 0.037228 | 0.30506   |



|            |                                                                  |            |          |         |   |         |          |          |         |        |         |
|------------|------------------------------------------------------------------|------------|----------|---------|---|---------|----------|----------|---------|--------|---------|
| E5RIA2     | Ectonucleotide pyrophosphatase/phosphodiesterase family member 2 | 0.37942    | 0.71652  | 0.88915 | ↓ | -0.169  | 0.50232  | 0.81601  | 1.1389  | ↑      | 0.1876  |
| Q12805     | EGF-containing fibulin-like extracellular matrix protein 1       | 0.37184    | 0.70911  | 0.62136 | ↓ | -0.687  | 0.54184  | 0.83687  | 1.348   | ↑      | 0.4308  |
| A0A0U1RQQ4 | Endothelial protein C receptor (Fragment)                        | 0.0066056  | 0.10826  | 0.64509 | ↓ | -0.632  | 0.001784 | 0.058464 | 1.4023  | ↑      | 0.4878  |
| O75715     | Epididymal secretory glutathione peroxidase                      | 0.056383   | 0.28425  | 1.2225  | ↑ | 0.2899  | 0.14606  | 0.45355  | 0.76598 | ↓      | -0.385  |
| Q16610     | Extracellular matrix protein 1                                   | 0.037416   | 0.25669  | 0.81155 | ↓ | -0.301  | 0.23116  | 0.59297  | 1.1291  | ↑      | 0.1752  |
| Q86UX7     | Fermitin family homolog 3                                        | 0.066649   | 0.30571  | 1.174   | ↑ | 0.2314  | 0.007487 | 0.13803  | 0.74157 | ↓      | -0.431  |
| C9JC68     | Fetuin-B (Fragment)                                              | 0.54938    | 0.80326  | 0.80952 | ↓ | -0.305  | 0.55402  | 0.84109  | 1.1747  | ↑      | 0.2323  |
| P02671     | Fibrinogen alpha chain                                           | 0.01628    | 0.17669  | 1.1394  | ↑ | 0.1883  | 0.026519 | 0.24447  | 0.84265 | ↓      | -0.247  |
| C9JC84     | Fibrinogen gamma chain                                           | 0.29457    | 0.6437   | 1.4669  | ↑ | 0.5527  | 0.32472  | 0.66988  | 0.68722 | ↓      | -0.541  |
| P02751     | Fibronectin                                                      | 0.013489   | 0.17301  | 0.68972 | ↓ | -0.536  | 0.073221 | 0.34857  | 1.2823  | ↑      | 0.3588  |
| H0Y4K8     | Fibronectin (Fragment)                                           | 0.42352    | 0.73678  | 0.78905 | ↓ | -0.342  | 0.71722  | 0.90382  | 1.293   | ↑      | 0.3708  |
| P23142     | Fibulin-1                                                        | 0.50424    | 0.7829   | 0.9232  | ↓ | -0.115  | 0.46252  | 0.78417  | 1.082   | ↑      | 0.1136  |
| Q15485     | Ficolin-2                                                        | 0.70115    | 0.84943  | 0.90326 | ↓ | -0.147  | 0.63639  | 0.86256  | 1.1982  | ↑      | 0.2609  |
| O75636     | Ficolin-3                                                        | 0.68905    | 0.84696  | 1.3219  | ↑ | 0.4026  | 0.37263  | 0.70466  | 0.49134 | ↓      | -1.025  |
| P21333     | Filamin-A                                                        | 0.01677    | 0.17669  | 0.92836 | ↓ | -0.107  | 0.11116  | 0.3999   | 1.109   | ↑      | 0.1493  |
| P04075     | Fructose-bisphosphate aldolase A                                 | 0.27377    | 0.63592  | 0.93874 | ↓ | -0.091  | 0.55129  | 0.84109  | 1.0409  | ↑      | 0.0578  |
| P09972     | Fructose-bisphosphate aldolase C                                 | 0.27343    | 0.63592  | 0.6732  | ↓ | -0.571  | 0.001296 | 0.054614 | 2.7002  | ↑      | 1.4331  |
| Q08380     | Galectin-3-binding protein                                       | 0.0030351  | 0.074613 | 0.74829 | ↓ | -0.418  | 0.020063 | 0.23334  | 1.213   | ↑      | 0.2786  |
| M0QX47     | Glia maturation factor gamma                                     | 0.12835    | 0.44027  | 1.3405  | ↑ | 0.4227  | 0.075365 | 0.34857  | 0.67804 | ↓      | -0.561  |
| P09211     | Glutathione S-transferase P                                      | 0.73434    | 0.86009  | 0.98477 | ↓ | -0.022  | 0.3294   | 0.67481  | 1.3853  | ↑      | 0.3708  |
| E7EUT5     | Glyceraldehyde-3-phosphate dehydrogenase                         | 0.70258    | 0.84943  | 0.88207 | ↓ | -0.181  | 0.99627  | 0.99679  | 1.2185  | ↑      | 0.2851  |
| A0A0C4DGZ8 | Glycoprotein Ib (Platelet), alpha polypeptide                    | 0.47045    | 0.77325  | 1.0747  | ↑ | 0.104   | 0.39385  | 0.72577  | 0.86705 | ↓      | -0.206  |
| P00738     | Haptoglobin                                                      | 4.2406E-06 | 0.00054  | 2.9485  | ↑ | 1.56    | 0.50357  | 0.81601  | 0.89474 | ↓      | -0.0154 |
| P00739     | Haptoglobin-related protein                                      | 0.44765    | 0.75895  | 1.1768  | ↑ | 0.2348  | 0.34456  | 0.68512  | 0.79971 | ↓      | -0.322  |
| G3V1N2     | HCG1745306, isoform CRA_a                                        | 0.37258    | 0.70911  | 0.55546 | ↓ | -0.848  | 0.33504  | 0.67745  | 7.6065  | ↑      | 2.9272  |
| E9PKE3     | Heat shock cognate 71 kDa protein                                | 0.0020789  | 0.055751 | 0.8012  | ↓ | -0.32   | 0.09421  | 0.37557  | 1.2865  | ↑      | 0.3635  |
| P69905     | Hemoglobin subunit alpha                                         | 0.77653    | 0.88106  | 0.95632 | ↓ | -0.064  | 0.11208  | 0.3999   | 1.839   | ↑      | 0.879   |
| P68871     | Hemoglobin subunit beta                                          | 0.81159    | 0.8967   | 0.83043 | ↓ | -0.268  | 0.067201 | 0.34857  | 1.5102  | ↑      | 0.5947  |
| P02790     | Hemopexin                                                        | 0.00099812 | 0.042293 | 1.3502  | ↑ | 0.4332  | 0.63062  | 0.86126  | 0.95719 | ↓      | -0.0263 |
| P05546     | Heparin cofactor 2                                               | 0.67791    | 0.83675  | 0.9675  | ↓ | -0.048  | 0.041842 | 0.30631  | 1.247   | ↑      | 0.3184  |
| G3XAK1     | Hepatocyte growth factor-like protein                            | 0.93618    | 0.97244  | 0.99661 | ↓ | -0.005  | 0.71999  | 0.90382  | 1.0843  | ↑      | 0.1168  |
| Q14520     | Hyaluronan-binding protein 2                                     | 0.62644    | 0.81782  | 0.95954 | ↓ | -0.06   | 0.021491 | 0.23447  | 1.3125  | ↑      | 0.3923  |
| A0A087WXI2 | IgGfC-binding protein                                            | 0.33952    | 0.68606  | 1.1377  | ↑ | 0.26953 | 0.60228  | 0.83814  | ↓       | -0.255 |         |
| A0A0G2JMB2 | Immunoglobulin heavy constant alpha 2 (Fragment)                 | 0.16582    | 0.50233  | 0.51849 | ↓ | -0.948  | 0.52065  | 0.82671  | 1.9653  | ↑      | 0.9747  |
| A0A0B4J2H0 | Immunoglobulin heavy variable 1-69D                              | 0.57869    | 0.80526  | 0.91866 | ↓ | -0.122  | 0.062574 | 0.34857  | 1.2961  | ↑      | 0.3742  |
| A0A075B7D8 | Immunoglobulin heavy variable 3/OR15-7 (pseudogene) (Fragment)   | 0.53314    | 0.79432  | 0.84596 | ↓ | -0.241  | 0.59644  | 0.84351  | 1.0386  | ↑      | 0.0546  |
| A0A4W8ZXM2 | Immunoglobulin heavy variable 3-72                               | 0.073797   | 0.31551  | 0.65731 | ↓ | -0.605  | 0.64911  | 0.86256  | 1.2178  | ↑      | 0.2843  |
| A0A075B6R2 | Immunoglobulin heavy variable 4-4                                | 0.61623    | 0.81782  | 0.86595 | ↓ | -0.208  | 0.97322  | 0.99362  | 1.111   | ↑      | 0.1519  |
| A0A5H1ZRQ3 | Immunoglobulin kappa constant (Fragment)                         | 0.26444    | 0.62407  | 0.6282  | ↓ | -0.671  | 0.069195 | 0.34857  | 2.0557  | ↑      | 1.0397  |
| A0A075B6P5 | Immunoglobulin kappa variable 2-28                               | 0.055452   | 0.28425  | 0.52416 | ↓ | -0.932  | 0.071076 | 0.34857  | 1.3925  | ↑      | 0.4777  |
| P0CF74     | Immunoglobulin lambda constant 6                                 | 0.99996    | 0.99996  | 1.0547  | ↑ | 0.0768  | 0.96083  | 0.99362  | 0.91249 | ↓      | -0.132  |
| A0A075B6K5 | Immunoglobulin lambda variable 3-9                               | 0.22345    | 0.58376  | 0.82312 | ↓ | -0.281  | 0.3549   | 0.68557  | 1.213   | ↑      | 0.2786  |
| P15814     | Immunoglobulin lambda-like polypeptide 1                         | 0.56074    | 0.80326  | 0.84322 | ↓ | -0.246  | 0.51626  | 0.82671  | 1.3306  | ↑      | 0.4121  |
| P05019     | Insulin-like growth factor I                                     | 0.62646    | 0.81782  | 1.0672  | ↑ | 0.0938  | 0.26347  | 0.60228  | 0.85601 | ↓      | -0.224  |
| P18065     | Insulin-like growth factor-binding protein 2                     | 0.90776    | 0.95513  | 0.94417 | ↓ | -0.083  | 0.19247  | 0.54299  | 1.3637  | ↑      | 0.4476  |
| A6XND0     | Insulin-like growth factor-binding protein 3                     | 0.067361   | 0.30571  | 1.0941  | ↑ | 0.1297  | 0.69619  | 0.89627  | 0.97875 | ↓      | -0.031  |
| A0A3B3IUE0 | Insulin-like growth factor-binding protein 6                     | 0.066922   | 0.30571  | 1.2303  | ↑ | 0.299   | 0.29211  | 0.61995  | 0.87012 | ↓      | -0.201  |
| P19827     | Inter-alpha-trypsin inhibitor heavy chain H1                     | 0.27653    | 0.63645  | 0.92248 | ↓ | -0.116  | 0.069738 | 0.34857  | 1.1391  | ↑      | 0.188   |
| Q9NPH3     | Interleukin-1 receptor accessory protein                         | 0.14319    | 0.44939  | 0.77394 | ↓ | -0.37   | 0.75568  | 0.92247  | 1.0478  | ↑      | 0.0674  |
| P27930     | Interleukin-1 receptor type 2                                    | 0.49024    | 0.78174  | 1.0995  | ↑ | 0.1369  | 0.19704  | 0.54299  | 0.76617 | ↓      | -0.384  |
| B7ZKJ8     | ITIH4 protein                                                    | 0.00005494 | 0.00054  | 1.4469  | ↑ | 0.533   | 0.067622 | 0.34857  | 0.86731 | ↓      | -0.205  |
| P29622     | Kallistatin                                                      | 0.43243    | 0.74168  | 1.1075  | ↑ | 0.1473  | 0.65595  | 0.86773  | 0.94711 | ↓      | -0.078  |
| A0A1B0GVI3 | Keratin, type I cytoskeletal 10                                  | 0.90269    | 0.95445  | 1.172   | ↑ | 0.229   | 0.56672  | 0.84351  | 0.7239  | ↓      | -0.466  |
| P08779     | Keratin, type I cytoskeletal 16                                  | 0.86474    | 0.93101  | 0.81239 | ↓ | -0.3    | 0.60337  | 0.84351  | 1.0963  | ↑      | 0.1327  |
| P13647     | Keratin, type II cytoskeletal 5                                  | 0.13658    | 0.44768  | 0.79901 | ↓ | -0.324  | 0.26007  | 0.60228  | 2.3771  | ↑      | 1.2492  |
| P02538     | Keratin, type II cytoskeletal 6A                                 | 0.80072    | 0.89474  | 0.95062 | ↓ | -0.073  | 0.9703   | 0.99362  | 1.0516  | ↑      | 0.0726  |
| P04259     | Keratin, type II cytoskeletal 6B                                 | 0.50351    | 0.7829   | 0.89012 | ↓ | -0.168  | 0.30031  | 0.6283   | 2.4749  | ↑      | 1.3074  |
| E7EQB2     | Lactotransferrin (Fragment)                                      | 0.036079   | 0.25341  | 1.1904  | ↑ | 0.2515  | 0.000787 | 0.053441 | 0.59945 | ↓      | -0.738  |
| C9JD84     | Latent-transforming growth factor beta-binding protein 1         | 0.67651    | 0.83675  | 0.91839 | ↓ | -0.123  | 0.94353  | 0.99362  | 1.0118  | ↑      | 0.017   |
| A0A3B3IS95 | L-lactate dehydrogenase                                          | 0.66416    | 0.83373  | 1.0918  | ↑ | 0.1267  | 0.73984  | 0.9209   | 0.99412 | ↓      | -0.009  |
| P51884     | Lumican                                                          | 0.01801    | 0.17881  | 0.88674 | ↓ | -0.173  | 0.12421  | 0.42116  | 1.1192  | ↑      | 0.1625  |
| E9PEK4     | Macrophage colony-stimulating factor 1 receptor                  | 0.0044189  | 0.086839 | 0.37453 | ↓ | -1.417  | 0.075855 | 0.34857  | 1.5543  | ↑      | 0.6362  |
| P48740     | Mannan-binding lectin serine protease 1                          | 0.057814   | 0.28425  | 0.85319 | ↓ | -0.229  | 0.17378  | 0.50759  | 1.1133  | ↑      | 0.1549  |
| P33908     | Mannosyl-oligosaccharide 1,2-alpha-mannosidase IA                | 0.71991    | 0.85635  | 1.0294  | ↑ | 0.0418  | 0.25415  | 0.59979  | 0.8933  | ↓      | -0.163  |
| Q16853     | Membrane primary amine oxidase                                   | 0.00062128 | 0.036656 | 0.63716 | ↓ | -0.65   | 0.24526  | 0.59722  | 1.1148  | ↑      | 0.1568  |
| P08571     | Monocyte differentiation antigen CD14                            | 0.36397    | 0.70792  | 0.91981 | ↓ | -0.121  | 0.011668 | 0.18253  | 1.2853  | ↑      | 0.3622  |
| F8W1R7     | Myosin light polypeptide 6                                       | 0.40467    | 0.72791  | 0.90229 | ↓ | -0.148  | 0.22408  | 0.59021  | 1.1619  | ↑      | 0.2165  |
| P12882     | Myosin-1                                                         | 0.18662    | 0.52937  | 1.2149  | ↑ | 0.2808  | 0.98283  | 0.99362  | 0.98047 | ↓      | -0.028  |
| P35579     | Myosin-9                                                         | 0.53011    | 0.79432  | 1.0363  | ↑ | 0.0514  | 0.93182  | 0.99362  | 0.9968  | ↓      | -0.005  |
| Q96PD5     | N-acetylmuramoyl-L-alanine amidase                               | 0.072055   | 0.31259  | 0.711   | ↓ | -0.492  | 0.80708  | 0.92247  | 1.143   | ↑      | 0.1928  |
| A0A087WTE4 | Neural cell adhesion molecule 1                                  | 0.88435    | 0.94484  | 1.0105  | ↑ | 0.0151  | 0.27023  | 0.60228  | 0.90086 | ↓      | -0.151  |
| A0A087X0M8 | Neural cell adhesion molecule L1-like protein                    | 0.56227    | 0.80326  | 1.0569  | ↑ | 0.0799  | 0.44351  | 0.76431  | 0.87309 | ↓      | -0.196  |
| O95497     | Pantetheinase                                                    | 0.34949    | 0.69194  | 0.90571 | ↓ | -0.143  | 0.24192  | 0.59722  | 1.3104  | ↑      | 0.39    |
| A0A1B0GU03 | Peptidase A1 domain-containing protein                           | 0.025799   | 0.21745  | 1.6851  | ↑ | 0.7528  | 0.15232  | 0.46324  | 0.69041 | ↓      | -0.534  |
| B1ALD9     | Periostin                                                        | 0.020865   | 0.18104  | 0.85518 | ↓ | -0.226  | 0.1432   | 0.44941  | 1.1574  | ↑      | 0.2108  |
| P30041     | Peroxiredoxin-6                                                  | 0.034058   | 0.25028  | 0.67571 | ↓ | -0.566  | 0.08979  | 0.36968  | 2.3079  | ↑      | 1.2066  |
| P80108     | Phosphatidylinositol-glycan-specific phospholipase D             | 0.11167    | 0.40334  | 0.84341 | ↓ | -0.246  | 0.11355  | 0.3999   | 1.1799  | ↑      | 0.2386  |
| P18669     | Phosphoglycerate mutase 1                                        | 0.6418     | 0.81962  | 0.77499 | ↓ | -0.368  | 0.12971  | 0.42515  | 1.8138  | ↑      | 0.859   |
| P55058     | Phospholipid transfer protein                                    | 0.050269   | 0.26962  | 1.1651  | ↑ | 0.2205  | 0.12908  | 0.42515  | 0.84982 | ↓      | -0.235  |
| P36955     | Pigment epithelium-derived factor                                | 0.01267    | 0.16989  | 0.83886 | ↓ | -0.254  | 0.015365 | 0.21584  | 1.1713  | ↑      | 0.2281  |
| H0YAC1     | Plasma kallikrein (Fragment)                                     | 0.47688    | 0.77325  | 1.0339  | ↑ | 0.0481  | 0.13641  | 0.43526  | 0.91223 | ↓      | -0.133  |
| P13796     | Plastin-2                                                        | 0.060073   | 0.29052  | 1.1629  | ↑ | 0.2177  | 0.005931 | 0.11665  | 0.76138 | ↓      | -0.393  |
| P02775     | Platelet basic protein                                           | 0.83148    | 0.90778  | 1.1219  | ↑ | 0.1659  | 0.29627  | 0.62427  | 0.47669 | ↓      | -1.069  |

|            |                                                       |            |          |         |   |        |          |          |         |   |        |
|------------|-------------------------------------------------------|------------|----------|---------|---|--------|----------|----------|---------|---|--------|
| P02776     | Platelet factor 4                                     | 0.027451   | 0.22495  | 0.67703 | ↓ | -0.563 | 0.10035  | 0.3947   | 2.2121  | ↑ | 1.1454 |
| P10720     | Platelet factor 4 variant                             | 0.029202   | 0.2267   | 1.1448  | ↑ | 0.1951 | 0.82525  | 0.93635  | 0.99208 | ↓ | -0.011 |
| P20742     | Pregnancy zone protein                                | 0.13118    | 0.44356  | 0.8607  | ↓ | -0.216 | 0.27485  | 0.60508  | 1.1019  | ↑ | 0.14   |
| F8W8W4     | Preylcysteine oxidase 1                               | 0.21192    | 0.56834  | 0.88744 | ↓ | -0.172 | 0.018491 | 0.23334  | 1.2894  | ↑ | 0.3668 |
| Q15113     | Procollagen C-endopeptidase enhancer 1                | 0.041308   | 0.25762  | 0.55613 | ↓ | -0.847 | 0.75476  | 0.92247  | 1.0991  | ↑ | 0.1363 |
| P07737     | Profilin-1                                            | 0.17199    | 0.50233  | 0.7539  | ↓ | -0.408 | 0.44563  | 0.76431  | 1.4985  | ↑ | 0.5835 |
| P12273     | Prolactin-inducible protein                           | 0.019549   | 0.17881  | 0.66973 | ↓ | -0.578 | 0.041593 | 0.30631  | 2.7053  | ↑ | 1.4358 |
| G3V2W1     | Protein Z-dependent protease inhibitor                | 0.50262    | 0.7829   | 1.0225  | ↑ | 0.0321 | 0.000906 | 0.053441 | 0.80204 | ↓ | -0.318 |
| Q92954     | Proteoglycan 4                                        | 0.00013711 | 0.010112 | 1.2314  | ↑ | 0.3003 | 0.001517 | 0.055935 | 0.7175  | ↓ | -0.479 |
| P00734     | Prothrombin                                           | 0.015976   | 0.17669  | 0.81791 | ↓ | -0.29  | 0.64858  | 0.86256  | 1.0315  | ↑ | 0.0447 |
| Q9NPG4     | Protocadherin-12                                      | 0.13934    | 0.44879  | 1.2088  | ↑ | 0.2736 | 0.24815  | 0.59722  | 0.82338 | ↓ | -0.28  |
| Q16609     | Putative apolipoprotein(a)-like protein 2             | 0.51579    | 0.79214  | 1.0114  | ↑ | 0.0163 | 0.96723  | 0.99362  | 0.99941 | ↓ | -9E-04 |
| Q6UXR4     | Putative serpin A13                                   | 0.46119    | 0.77301  | 1.1648  | ↑ | 0.2201 | 0.67991  | 0.88358  | 0.93338 | ↓ | -0.099 |
| A0A804F6T5 | Pyruvate kinase PKM                                   | 0.040869   | 0.25762  | 0.86567 | ↓ | -0.208 | 0.003472 | 0.073158 | 1.2669  | ↑ | 0.3413 |
| P23470     | Receptor-type tyrosine-protein phosphatase gamma      | 0.60841    | 0.81782  | 1.1248  | ↑ | 0.1697 | 0.29092  | 0.61995  | 0.77748 | ↓ | -0.363 |
| P02753     | Retinol-binding protein 4                             | 0.11348    | 0.40334  | 1.1062  | ↑ | 0.1456 | 0.37219  | 0.70466  | 0.92496 | ↓ | -0.113 |
| J3KRE2     | Rho GDP-dissociation inhibitor 1                      | 0.057147   | 0.28425  | 1.4075  | ↑ | 0.4931 | 0.94875  | 0.99362  | 0.99219 | ↓ | -0.011 |
| A0A096LPE2 | SAA2-SAA4 readthrough                                 | 0.085496   | 0.34083  | 1.4929  | ↑ | 0.5781 | 0.66078  | 0.87023  | 0.96803 | ↓ | -0.047 |
| C9JHR8     | Scavenger receptor cysteine-rich type 1 protein M130  | 0.11316    | 0.40334  | 0.87688 | ↓ | -0.19  | 0.25104  | 0.59722  | 1.0847  | ↑ | 0.1174 |
| A0A0C4DGN2 | Sex hormone-binding globulin (Fragment)               | 0.98541    | 0.99463  | 1.0126  | ↑ | 0.0181 | 0.42213  | 0.74771  | 0.90553 | ↓ | -0.143 |
| P09486     | SPARC                                                 | 0.25812    | 0.62407  | 1.274   | ↑ | 0.3493 | 0.93754  | 0.99362  | 0.89958 | ↓ | -0.153 |
| Q9Y490     | Talin-1                                               | 0.57348    | 0.80326  | 1.0364  | ↑ | 0.0516 | 0.87403  | 0.95989  | 0.98493 | ↓ | -0.022 |
| E7ES19     | Thrombospondin-4                                      | 0.42387    | 0.73678  | 0.83044 | ↓ | -0.268 | 0.95218  | 0.99362  | 1.0169  | ↑ | 0.0242 |
| P62328     | Thymosin beta-4                                       | 0.0088955  | 0.13121  | 1.564   | ↑ | 0.6452 | 0.042572 | 0.30631  | 0.67163 | ↓ | -0.574 |
| P05543     | Thyroxine-binding globulin                            | 0.33087    | 0.68606  | 1.2457  | ↑ | 0.3169 | 0.75883  | 0.92247  | 0.91644 | ↓ | -0.126 |
| F2Z393     | Transaldolase                                         | 0.015433   | 0.17669  | 1.1849  | ↑ | 0.2448 | 0.27702  | 0.60533  | 0.90228 | ↓ | -0.148 |
| Q15582     | Transforming growth factor-beta-induced protein ig-h3 | 0.045986   | 0.26353  | 0.81123 | ↓ | -0.302 | 0.10962  | 0.3999   | 1.1379  | ↑ | 0.1864 |
| P37802     | Transgelin-2                                          | 0.031907   | 0.24135  | 1.4242  | ↑ | 0.5102 | 0.02375  | 0.2416   | 0.67239 | ↓ | -0.573 |
| A0A087WT59 | Transthyretin                                         | 0.15366    | 0.47217  | 1.4113  | ↑ | 0.4971 | 0.025667 | 0.24425  | 0.54758 | ↓ | -0.869 |
| O43280     | Trehalase                                             | 0.33954    | 0.68606  | 0.61454 | ↓ | -0.702 | 0.94489  | 0.99362  | 1.0015  | ↑ | 0.0021 |
| P60174     | Triosephosphate isomerase                             | 0.32691    | 0.68395  | 1.0477  | ↑ | 0.0673 | 0.30435  | 0.63227  | 0.99261 | ↓ | -0.011 |
| P67936     | Tropomyosin alpha-4 chain                             | 0.069636   | 0.30661  | 0.84557 | ↓ | -0.242 | 0.054569 | 0.33537  | 1.2291  | ↑ | 0.2976 |
| P68363     | Tubulin alpha-1B chain                                | 0.67111    | 0.83675  | 0.95717 | ↓ | -0.063 | 0.49213  | 0.81601  | 1.056   | ↑ | 0.0786 |
| P68366     | Tubulin alpha-4A chain                                | 0.64135    | 0.81962  | 0.86586 | ↓ | -0.208 | 0.16091  | 0.48437  | 1.2779  | ↑ | 0.3537 |
| Q9H4B7     | Tubulin beta-1 chain                                  | 0.45529    | 0.7675   | 1.0658  | ↑ | 0.0919 | 0.87529  | 0.95989  | 0.98615 | ↓ | -0.02  |
| A0A7I2V2Y2 | Vesicle-fusing ATPase                                 | 0.80692    | 0.89489  | 1.3782  | ↑ | 0.4628 | 0.58585  | 0.84351  | 0.48373 | ↓ | -1.048 |
| E7END6     | Vitamin K-dependent protein C                         | 0.47705    | 0.77325  | 1.1925  | ↑ | 0.254  | 0.61432  | 0.84684  | 0.85368 | ↓ | -0.228 |
| Q7Z5L0     | Vitelline membrane outer layer protein 1 homolog      | 0.98737    | 0.99463  | 1.0057  | ↑ | 0.0082 | 0.77612  | 0.92247  | 0.82824 | ↓ | -0.272 |
| O75083     | WD repeat-containing protein 1                        | 0.32391    | 0.68395  | 0.88935 | ↓ | -0.169 | 0.11457  | 0.3999   | 1.4264  | ↑ | 0.5124 |
| P25311     | Zinc-alpha-2-glycoprotein                             | 0.56046    | 0.80326  | 1.0621  | ↑ | 0.0869 | 0.59911  | 0.84351  | 0.93619 | ↓ | -0.095 |

Supplementary Table 6. Comparison of the effects of radiation at 24 h post-irradiation.

| UniProtKB  | ProteinNames                                                      | 24 Hour vs. Pre |           |         |             | 24 Hour ExRad I vs. Vehicle |         |         |            | 24 Hour ExRad II vs. Vehicle |           |         |            |
|------------|-------------------------------------------------------------------|-----------------|-----------|---------|-------------|-----------------------------|---------|---------|------------|------------------------------|-----------|---------|------------|
|            |                                                                   | p-value         | FDR       | FC      | Log2(FC)    | p-value                     | FDR     | FC      | Log2(FC)   | p-value                      | FDR       | FC      | Log2(FC)   |
| P62258     | 14-3-3 protein epsilon                                            | 0.033561        | 0.1868    | 1.2568  | 0.32977     | 0.96269                     | 0.9938  | 1.0723  | 0.10068    | 0.088168                     | 0.49373   | 0.81342 | -0.29794   |
| P61981     | 14-3-3 protein gamma                                              | 0.004852        | 0.062232  | 2.5896  | 1.3727      | 0.11499                     | 0.87729 | 0.60636 | -0.72175   | 0.0090593                    | 0.24252   | 0.40775 | -1.2942    |
| P63104     | 14-3-3 protein zeta/delta                                         | 0.19204         | 0.47606   | 1.1016  | 0.13963     | 0.78567                     | 0.9938  | 0.98855 | -0.016619  | 0.049378                     | 0.45202   | 0.84488 | -0.24319   |
| A0A2R8Y6G6 | 2-phospho-D-glycerate hydro-lyase                                 | 0.091762        | 0.3342    | 1.2395  | 0.30975     | 0.06746                     | 0.87729 | 0.73298 | -0.44815   | 0.18905                      | 0.63067   | 0.80877 | -0.3062    |
| P08253     | 72 kDa type IV collagenase                                        | 0.072876        | 0.30394   | 1.2041  | 0.26795     | 0.11559                     | 0.87729 | 0.82323 | -0.28063   | 0.063739                     | 0.45971   | 0.8     | -0.32193   |
| A0A7P0TAI0 | 78 kDa glucose-regulated protein                                  | 0.48099         | 0.75015   | 1.0725  | 0.101       | 0.96148                     | 0.9938  | 0.99337 | -0.0096031 | 0.34543                      | 0.73166   | 0.88679 | -0.17334   |
| Q76LX8     | A disintegrin and metalloproteinase with thrombospondin motifs 13 | 0.78142         | 0.94218   | 1.1243  | 0.16899     | 0.99281                     | 0.99618 | 0.94262 | -0.085251  | 0.96085                      | 0.98969   | 0.99224 | -0.011236  |
| Q92484     | Acid sphingomyelinase-like phosphodiesterase 3a                   | 0.98008         | 0.9901    | 1.109   | 0.14922     | 0.54233                     | 0.9938  | 1.0905  | 0.12498    | 0.58914                      | 0.87223   | 1.2344  | 0.30377    |
| P68032     | Actin, alpha cardiac muscle 1                                     | 0.018521        | 0.11878   | 5.0575  | 2.3384      | 0.32727                     | 0.95351 | 0.72223 | -0.46947   | 0.023827                     | 0.35145   | 0.2     | -2.3219    |
| P60709     | Actin, cytoplasmic 1                                              | 0.010467        | 0.085773  | 2.3177  | 1.2127      | 0.57109                     | 0.9938  | 0.954   | -0.067939  | 0.0053125                    | 0.1959    | 0.33159 | -1.5925    |
| I3L4N8     | Actin, cytoplasmic 2                                              | 4.3524E-07      | 0.0001284 | 1.9208  | 0.94172     | 0.037586                    | 0.87729 | 0.69786 | -0.51898   | 0.000028581                  | 0.0084314 | 0.44452 | -1.1697    |
| Q15848     | Adiponectin                                                       | 0.93207         | 0.97813   | 0.99957 | -0.00061552 | 0.58253                     | 0.9938  | 1.2092  | 0.27406    | 0.17198                      | 0.58994   | 0.8129  | -0.29886   |
| K7ERG9     | Adipsin                                                           | 0.76342         | 0.93901   | 0.97905 | -0.03054    | 0.033841                    | 0.87729 | 1.3012  | 0.37986    | 0.91817                      | 0.98138   | 0.99397 | -0.0087263 |
| P43652     | Afamin                                                            | 0.8657          | 0.96049   | 1.0091  | 0.013083    | 0.44893                     | 0.9938  | 0.94898 | -0.075555  | 0.28695                      | 0.69981   | 0.92645 | -0.11021   |
| A0A0C4DGB6 | Albumin                                                           | 0.19566         | 0.47702   | 0.74994 | -0.41516    | 0.083778                    | 0.87729 | 0.63318 | -0.6593    | 0.82672                      | 0.96097   | 1.0064  | 0.0092183  |
| P02763     | Alpha-1-acid glycoprotein 1                                       | 0.000036408     | 0.0017901 | 6.2053  | 2.6335      | 0.34449                     | 0.95351 | 0.87072 | -0.19971   | 0.21235                      | 0.64747   | 0.6489  | -0.62393   |
| P01011     | Alpha-1-antichymotrypsin                                          | 0.000019879     | 0.0017901 | 4.4226  | 2.1449      | 0.76507                     | 0.9938  | 1.2028  | 0.26634    | 0.51674                      | 0.82879   | 1.0471  | 0.066363   |
| A0A024R6I7 | Alpha-1-antitrypsin                                               | 0.098064        | 0.34069   | 1.4119  | 0.49765     | 0.077804                    | 0.87729 | 0.66153 | -0.59612   | 0.50653                      | 0.82555   | 0.84644 | -0.24052   |
| P04217     | Alpha-1B-glycoprotein                                             | 0.46242         | 0.73013   | 0.92694 | -0.10945    | 0.96017                     | 0.9938  | 0.98872 | -0.016361  | 0.75089                      | 0.9325    | 0.96241 | -0.055273  |
| P08697     | Alpha-2-antiplasmin                                               | 0.4932          | 0.75295   | 1.0296  | 0.042067    | 0.85172                     | 0.9938  | 1.0192  | 0.027435   | 0.35518                      | 0.73166   | 1.1898  | 0.25068    |
| C9JV77     | Alpha-2-HS-glycoprotein                                           | 0.41244         | 0.7073    | 0.8666  | -0.20656    | 0.14924                     | 0.9198  | 0.71032 | -0.49347   | 0.092163                     | 0.49373   | 0.67489 | -0.56727   |
| P01023     | Alpha-2-macroglobulin                                             | 0.69658         | 0.90525   | 0.97865 | -0.031129   | 0.81406                     | 0.9938  | 1.0297  | 0.042254   | 0.34799                      | 0.73166   | 1.1035  | 0.14211    |
| A0A7I2V4Y4 | Alpha-actinin-1                                                   | 0.50172         | 0.75515   | 0.94622 | -0.079758   | 0.25094                     | 0.9198  | 1.1342  | 0.1817     | 0.75997                      | 0.9325    | 1.03    | 0.042611   |
| A0A0C4DGL1 | Alpha-mannosidase 2x                                              | 0.044786        | 0.22779   | 1.2259  | 0.29383     | 0.1693                      | 0.9198  | 0.80233 | -0.31773   | 0.018067                     | 0.31666   | 0.66534 | -0.58785   |
| P54802     | Alpha-N-acetylglucosaminidase                                     | 0.48315         | 0.75015   | 0.94358 | -0.083776   | 0.93495                     | 0.9938  | 1.0239  | 0.034041   | 0.95327                      | 0.98969   | 0.99696 | -0.004386  |
| A0A7P0T8D1 | Angiotensin 1                                                     | 0.00032702      | 0.0098998 | 1.4631  | 0.54899     | 0.066338                    | 0.87729 | 0.81546 | -0.29431   | 0.11883                      | 0.54775   | 0.84041 | -0.25084   |
| A0A0A0MSN4 | Angiotensin-converting enzyme                                     | 0.25842         | 0.54845   | 0.85173 | -0.23153    | 0.75577                     | 0.9938  | 1.0137  | 0.019626   | 0.16257                      | 0.58994   | 1.193   | 0.25458    |
| P04083     | Annexin A1                                                        | 0.99902         | 0.99902   | 0.92099 | -0.11875    | 0.4401                      | 0.9938  | 0.89211 | -0.1647    | 0.91179                      | 0.98138   | 0.98991 | -0.014624  |
| P01008     | Antithrombin-III                                                  | 0.021333        | 0.13111   | 0.8569  | -0.22279    | 0.60474                     | 0.9938  | 1.1107  | 0.15149    | 0.17671                      | 0.59917   | 1.0946  | 0.13045    |
| F8W696     | Apolipoprotein A-I                                                | 0.95492         | 0.97813   | 0.99432 | -0.0082146  | 0.66598                     | 0.9938  | 0.965   | -0.051397  | 0.59192                      | 0.87223   | 1.0608  | 0.085137   |
| P06727     | Apolipoprotein A-IV                                               | 0.88917         | 0.96049   | 1.0152  | 0.021746    | 0.33292                     | 0.95351 | 0.90534 | -0.14346   | 0.85945                      | 0.96402   | 0.98515 | -0.021592  |
| P04114     | Apolipoprotein B-100                                              | 0.86451         | 0.96049   | 1.0029  | 0.0042077   | 0.11598                     | 0.87729 | 1.2689  | 0.34357    | 0.43889                      | 0.80288   | 1.0734  | 0.10218    |
| K7ER74     | Apolipoprotein C-II                                               | 0.88755         | 0.96049   | 0.91818 | -0.12315    | 0.9739                      | 0.9938  | 1.488   | 0.57333    | 0.99364                      | 0.99528   | 0.97109 | -0.042317  |
| B0Y1W2     | Apolipoprotein C-III                                              | 0.15843         | 0.42487   | 0.72278 | -0.46838    | 0.78934                     | 0.9938  | 1.0522  | 0.073389   | 0.9232                       | 0.98212   | 1.1354  | 0.1832     |
| P02649     | Apolipoprotein E                                                  | 0.013006        | 0.095917  | 1.2592  | 0.3325      | 0.26999                     | 0.9198  | 0.89727 | -0.15638   | 0.39867                      | 0.76868   | 0.91715 | -0.12477   |
| P08519     | Apolipoprotein(a)                                                 | 0.09367         | 0.33698   | 1.0748  | 0.10403     | 0.1145                      | 0.87729 | 0.88723 | -0.17262   | 0.058021                     | 0.45202   | 0.84348 | -0.24557   |
| O75882     | Attractin                                                         | 0.95392         | 0.97813   | 0.98945 | -0.015295   | 0.62065                     | 0.9938  | 1.0368  | 0.052129   | 0.77678                      | 0.93531   | 0.9901  | -0.01435   |
| P02749     | Beta-2-glycoprotein 1                                             | 0.088214        | 0.32939   | 0.9334  | -0.099438   | 0.33607                     | 0.95351 | 1.1098  | 0.15033    | 0.86671                      | 0.96773   | 1.0082  | 0.01176    |
| J3KRP0     | Beta-Ala-His dipeptidase                                          | 0.58412         | 0.81667   | 1.017   | 0.024291    | 0.37671                     | 0.97482 | 0.90959 | -0.13671   | 0.54626                      | 0.85254   | 1.0933  | 0.1287     |
| P43251     | Biotinidase                                                       | 0.70642         | 0.90606   | 1.0323  | 0.045839    | 0.43778                     | 0.9938  | 1.292   | 0.36955    | 0.5849                       | 0.87223   | 1.0978  | 0.13468    |
| J3KSD8     | Bleomycin hydrolase (Fragment)                                    | 0.94221         | 0.97813   | 0.62068 | -0.68809    | 0.7059                      | 0.9938  | 0.44923 | -1.1545    | 0.32199                      | 0.73166   | 0.29554 | -1.7586    |
| Q9UBW5     | Bridging integrator 2                                             | 0.11271         | 0.35226   | 1.3852  | 0.47013     | 0.40162                     | 0.9938  | 0.77078 | -0.3756    | 0.055201                     | 0.45202   | 0.56081 | -0.8344    |
| B4E1Z4     | C3/C5 convertase                                                  | 0.21814         | 0.50274   | 1.0676  | 0.094378    | 0.98706                     | 0.9938  | 1.005   | 0.0071371  | 0.69701                      | 0.91712   | 0.9756  | -0.035633  |
| P04003     | C4b-binding protein alpha chain                                   | 0.35555         | 0.65966   | 1.0058  | 0.0083306   | 0.62161                     | 0.9938  | 0.97356 | -0.038662  | 0.051831                     | 0.45202   | 0.84276 | -0.24681   |
| P20851     | C4b-binding protein beta chain                                    | 0.27272         | 0.5587    | 0.85259 | -0.23008    | 0.49622                     | 0.9938  | 1.089   | 0.12303    | 0.50291                      | 0.82421   | 1.1213  | 0.16517    |
| H3BNC6     | Cadherin-1                                                        | 0.24142         | 0.52437   | 1.1745  | 0.23206     | 0.80131                     | 0.9938  | 1.189   | 0.2498     | 0.093726                     | 0.49373   | 0.73725 | -0.43977   |
| P55290     | Cadherin-13                                                       | 0.97719         | 0.9901    | 1.0397  | 0.056139    | 0.92636                     | 0.9938  | 1.0451  | 0.063705   | 0.889                        | 0.96773   | 0.95286 | -0.069663  |
| P33151     | Cadherin-5                                                        | 0.5459          | 0.78556   | 1.2965  | 0.37461     | 0.74556                     | 0.9938  | 0.94151 | -0.086954  | 0.91773                      | 0.98138   | 0.90892 | -0.13777   |
| Q9NZT1     | Calmodulin-like protein 5                                         | 0.73699         | 0.92911   | 0.43411 | -1.2039     | 0.72398                     | 0.9938  | 1.2843  | 0.36102    | 0.64949                      | 0.89295   | 1.0661  | 0.092322   |
| E5RFL2     | Carbonate dehydratase I (Fragment)                                | 0.53186         | 0.77673   | 3.0751  | 1.6206      | 0.96817                     | 0.9938  | 0.42579 | -1.2318    | 0.39841                      | 0.76868   | 0.25992 | -1.9439    |
| P00918     | Carbonic anhydrase 2                                              | 0.78311         | 0.94218   | 0.99436 | -0.0081533  | 0.25003                     | 0.9198  | 2.3003  | 1.2018     | 0.78193                      | 0.93768   | 1.0262  | 0.03725    |
| A0A087WSY5 | Carboxypeptidase B2                                               | 0.48804         | 0.75295   | 1.0573  | 0.080358    | 0.78965                     | 0.9938  | 0.9689  | -0.045582  | 0.23117                      | 0.64747   | 0.86673 | -0.20634   |
| P15169     | Carboxypeptidase N catalytic chain                                | 0.84774         | 0.96049   | 0.99695 | -0.0044097  | 0.7933                      | 0.9938  | 1.1266  | 0.17198    | 0.36745                      | 0.74757   | 1.1091  | 0.14933    |
| P22792     | Carboxypeptidase N subunit 2                                      | 0.79387         | 0.94432   | 1.0331  | 0.046983    | 0.8786                      | 0.9938  | 1.0928  | 0.12807    | 0.8131                       | 0.95369   | 0.95843 | -0.06125   |



|            |                                                         |           |          |         |   |            |           |         |         |   |            |          |         |         |   |           |
|------------|---------------------------------------------------------|-----------|----------|---------|---|------------|-----------|---------|---------|---|------------|----------|---------|---------|---|-----------|
| E5RH35     | Carboxypeptidase Q (Fragment)                           | 0.88571   | 0.96049  | 0.76242 | ↓ | -0.39133   | 0.83055   | 0.9938  | 1.5884  | ↑ | 0.66757    | 0.90167  | 0.97792 | 1.185   | ↑ | 0.24484   |
| A0A0C4DFP6 | Cartilage acidic protein 1                              | 0.3627    | 0.66606  | 0.94318 | ↓ | -0.084389  | 0.359     | 0.95409 | 1.0641  | ↑ | 0.089571   | 0.86346  | 0.96485 | 1.0195  | ↑ | 0.027875  |
| G3XAP6     | Cartilage oligomeric matrix protein                     | 0.13644   | 0.38701  | 0.81762 | ↓ | -0.29049   | 0.15602   | 0.9198  | 1.1824  | ↑ | 0.24178    | 0.2706   | 0.68767 | 1.2128  | ↑ | 0.2784    |
| P04040     | Catalase                                                | 0.046541  | 0.22801  | 1.2079  | ↑ | 0.27255    | 0.49427   | 0.9938  | 0.93589 | ↓ | -0.095585  | 0.14967  | 0.58994 | 0.84454 | ↓ | -0.24376  |
| A0A7P0T8I6 | Cathepsin X                                             | 0.39406   | 0.68259  | 0.91057 | ↓ | -0.13515   | 0.53331   | 0.9938  | 0.96901 | ↓ | -0.045423  | 0.57502  | 0.87223 | 0.91784 | ↓ | -0.12368  |
| P11717     | Cation-independent mannose-6-phosphate receptor         | 0.11463   | 0.35226  | 1.1009  | ↑ | 0.13868    | 0.13745   | 0.9198  | 0.88249 | ↓ | -0.18034   | 0.14014  | 0.58994 | 0.88798 | ↓ | -0.1714   |
| Q6YHK3     | CD109 antigen                                           | 0.098968  | 0.34069  | 0.88509 | ↓ | -0.1761    | 0.03149   | 0.87729 | 1.2664  | ↑ | 0.34072    | 0.15395  | 0.58994 | 1.1734  | ↑ | 0.23073   |
| H0Y2P0     | CD44 antigen (Fragment)                                 | 0.22732   | 0.50802  | 1.2319  | ↑ | 0.30086    | 0.70354   | 0.9938  | 0.90627 | ↓ | -0.14198   | 0.14954  | 0.58994 | 0.73998 | ↓ | -0.43443  |
| O43866     | CD5 antigen-like                                        | 0.91897   | 0.97813  | 0.90711 | ↓ | -0.14065   | 0.98415   | 0.9938  | 1.0446  | ↑ | 0.062906   | 0.55235  | 0.85254 | 0.88604 | ↓ | -0.17456  |
| P00450     | Ceruloplasmin                                           | 0.3768    | 0.67081  | 1.0394  | ↓ | 0.055776   | 0.17989   | 0.9198  | 1.1108  | ↑ | 0.15155    | 0.43144  | 0.80047 | 1.0388  | ↑ | 0.054984  |
| P36222     | Chitinase-3-like protein 1                              | 0.11344   | 0.35226  | 0.81124 | ↓ | -0.3018    | 0.90039   | 0.9938  | 1.0145  | ↑ | 0.020733   | 0.30668  | 0.72375 | 0.90479 | ↓ | -0.14434  |
| O00299     | Chloride intracellular channel protein 1                | 0.99412   | 0.9975   | 1.3126  | ↑ | 0.39243    | 0.76427   | 0.9938  | 0.75395 | ↓ | -0.40746   | 0.97856  | 0.98969 | 0.75208 | ↓ | -0.41104  |
| H3BRJ9     | Cholesteryl ester transfer protein                      | 0.58207   | 0.81667  | 0.39333 | ↓ | -1.3462    | 0.34908   | 0.95351 | 0.84327 | ↓ | -0.24593   | 0.97451  | 0.98969 | 1.0063  | ↑ | 0.0091149 |
| P06276     | Cholinesterase                                          | 0.77959   | 0.94218  | 0.90371 | ↓ | -0.14608   | 0.73369   | 0.9938  | 1.1009  | ↑ | 0.13871    | 0.63135  | 0.88242 | 0.92763 | ↓ | -0.10837  |
| P08217     | Chymotrypsin-like elastase family member 2A             | 0.0062999 | 0.067367 | 2.2107  | ↑ | 1.1445     | 0.5093    | 0.9938  | 2.2848  | ↑ | 1.1921     | 0.047168 | 0.45202 | 0.55674 | ↓ | -0.84493  |
| P08861     | Chymotrypsin-like elastase family member 3B             | 0.0073556 | 0.071305 | 2.5827  | ↑ | 1.3689     | 0.60298   | 0.9938  | 1.2102  | ↑ | 0.27525    | 0.38939  | 0.76154 | 1.1551  | ↑ | 0.20803   |
| P10909     | Clusterin                                               | 0.44906   | 0.73013  | 0.94063 | ↓ | -0.088294  | 0.23202   | 0.9198  | 1.1112  | ↑ | 0.15213    | 0.98195  | 0.98969 | 1.004   | ↑ | 0.0057621 |
| Q14019     | Coactosin-like protein                                  | 0.30492   | 0.59178  | 1.2084  | ↑ | 0.27308    | 0.96434   | 0.9938  | 0.98594 | ↓ | -0.020435  | 0.10733  | 0.5277  | 0.73833 | ↓ | -0.43767  |
| P00740     | Coagulation factor IX                                   | 0.087619  | 0.32939  | 0.83905 | ↓ | -0.25317   | 0.1987    | 0.9198  | 1.3097  | ↑ | 0.38922    | 0.15238  | 0.58994 | 1.2006  | ↑ | 0.26377   |
| A0A0A0MRJ7 | Coagulation factor V                                    | 0.26993   | 0.5587   | 1.0476  | ↑ | 0.067094   | 0.56663   | 0.9938  | 1.0852  | ↑ | 0.11802    | 0.19027  | 0.63067 | 1.0854  | ↑ | 0.11824   |
| F5H8B0     | Coagulation factor VII                                  | 0.37208   | 0.67081  | 1.185   | ↑ | 0.24483    | 0.40553   | 0.9938  | 0.8309  | ↓ | -0.26726   | 0.28702  | 0.69981 | 0.79504 | ↓ | -0.3309   |
| P00742     | Coagulation factor X                                    | 0.067569  | 0.29313  | 0.84082 | ↓ | -0.25014   | 0.65071   | 0.9938  | 1.0305  | ↑ | 0.043373   | 0.22429  | 0.64747 | 1.1231  | ↑ | 0.16746   |
| P03951     | Coagulation factor XI                                   | 0.83071   | 0.95354  | 0.99038 | ↓ | -0.013947  | 0.96709   | 0.9938  | 1.0191  | ↑ | 0.027319   | 0.85832  | 0.96402 | 1.0293  | ↑ | 0.04167   |
| P00748     | Coagulation factor XII                                  | 0.26791   | 0.5587   | 0.89965 | ↓ | -0.15257   | 0.40687   | 0.9938  | 1.0703  | ↑ | 0.098021   | 0.33799  | 0.73166 | 1.1272  | ↑ | 0.17279   |
| P00488     | Coagulation factor XIII A chain                         | 0.61581   | 0.8489   | 1.0924  | ↑ | 0.12756    | 0.8865    | 0.9938  | 0.98406 | ↓ | -0.023175  | 0.68674  | 0.91712 | 1.0393  | ↑ | 0.055665  |
| P05160     | Coagulation factor XIII B chain                         | 0.80302   | 0.94756  | 0.97686 | ↓ | -0.033776  | 0.55031   | 0.9938  | 1.0455  | ↑ | 0.064197   | 0.81468  | 0.95369 | 0.97518 | ↓ | -0.036265 |
| O00748     | Cocaine esterase                                        | 0.42661   | 0.7139   | 0.49049 | ↓ | -1.0277    | 0.56412   | 0.9938  | 0.67524 | ↓ | -0.56654   | 0.085657 | 0.49373 | 1.14868 | ↓ | -2.7497   |
| E9PP50     | Cofilin, non-muscle isoform (Fragment)                  | 0.85858   | 0.96049  | 0.87145 | ↓ | -0.19852   | 0.52026   | 0.9938  | 5.7102  | ↑ | 2.5135     | 0.38197  | 0.76136 | 0.88725 | ↓ | -0.17258  |
| P02452     | Collagen alpha-1(I) chain                               | 0.66884   | 0.88084  | 1.0258  | ↑ | 0.0367     | 0.35385   | 0.95409 | 0.85554 | ↓ | -0.22509   | 0.24129  | 0.64747 | 0.82442 | ↓ | -0.27854  |
| P02745     | Complement C1q subcomponent subunit A                   | 0.95243   | 0.97813  | 0.98586 | ↓ | -0.02054   | 0.9831    | 0.9938  | 1.0007  | ↑ | 0.0010584  | 0.80996  | 0.95369 | 0.98526 | ↓ | -0.021426 |
| A0A0A0MSV6 | Complement C1q subcomponent subunit B (Fragment)        | 0.76463   | 0.93901  | 1.1147  | ↑ | 0.15666    | 0.15003   | 0.9198  | 1.4636  | ↑ | 0.54949    | 0.11422  | 0.54775 | 1.4528  | ↑ | 0.53885   |
| P02747     | Complement C1q subcomponent subunit C                   | 0.85563   | 0.96049  | 0.91153 | ↓ | -0.13364   | 0.11533   | 0.87729 | 1.7223  | ↑ | 0.78436    | 0.49435  | 0.8205  | 0.96605 | ↓ | -0.049831 |
| H0YFL7     | Complement C1r subcomponent-like protein (Fragment)     | 0.42246   | 0.71214  | 0.7595  | ↓ | -0.39688   | 0.21518   | 0.9198  | 1.6559  | ↑ | 0.72763    | 0.98065  | 0.98969 | 1.0286  | ↑ | 0.040644  |
| A0A087X232 | Complement C1s subcomponent                             | 0.60545   | 0.83853  | 1.0412  | ↑ | 0.058314   | 0.9643    | 0.9938  | 0.99509 | ↓ | -0.0070985 | 0.32122  | 0.73166 | 0.90515 | ↓ | -0.14377  |
| P06681     | Complement C2                                           | 0.92336   | 0.97813  | 1.0305  | ↓ | 0.043331   | 0.29956   | 0.95108 | 1.1848  | ↑ | 0.24461    | 0.99528  | 0.99528 | 0.94964 | ↓ | -0.074542 |
| P01024     | Complement C3                                           | 0.93079   | 0.97813  | 0.99608 | ↓ | -0.0056665 | 0.22697   | 0.9198  | 1.1777  | ↑ | 0.23598    | 0.80016  | 0.94798 | 1.0246  | ↑ | 0.035128  |
| P0C0L4     | Complement C4-A                                         | 0.55557   | 0.7956   | 1.0246  | ↑ | 0.034991   | 0.042897  | 0.87729 | 1.2361  | ↑ | 0.30584    | 0.83249  | 0.96097 | 0.99253 | ↓ | -0.010825 |
| P0C0L5     | Complement C4-B                                         | 0.66577   | 0.88072  | 1.0965  | ↑ | 0.13293    | 0.86426   | 0.9938  | 0.88381 | ↓ | -0.17819   | 0.83298  | 0.96097 | 0.91047 | ↓ | -0.13532  |
| P01031     | Complement C5                                           | 0.14291   | 0.39609  | 1.1252  | ↑ | 0.17019    | 0.94386   | 0.9938  | 1.004   | ↑ | 0.0057544  | 0.27161  | 0.68767 | 0.90072 | ↓ | -0.15084  |
| F5GY80     | Complement component 8 subunit beta                     | 0.16073   | 0.42718  | 1.0603  | ↑ | 0.084413   | 0.2831    | 0.93836 | 0.93794 | ↓ | -0.092438  | 0.34158  | 0.73166 | 0.93702 | ↓ | -0.093855 |
| P13671     | Complement component C6                                 | 0.89211   | 0.96049  | 1.0072  | ↓ | 0.010361   | 0.34495   | 0.95351 | 1.0932  | ↑ | 0.12854    | 0.35715  | 0.73166 | 0.91662 | ↓ | -0.1256   |
| P10643     | Complement component C7                                 | 0.72612   | 0.92329  | 0.97395 | ↓ | -0.038076  | 0.55652   | 0.9938  | 1.039   | ↑ | 0.055129   | 0.21911  | 0.64747 | 1.0985  | ↑ | 0.13558   |
| P07357     | Complement component C8 alpha chain                     | 0.86009   | 0.96049  | 0.988   | ↓ | -0.017423  | 0.71257   | 0.9938  | 1.0203  | ↑ | 0.029043   | 0.49771  | 0.8205  | 1.0762  | ↑ | 0.10596   |
| P07360     | Complement component C8 gamma chain                     | 0.75289   | 0.93714  | 0.98372 | ↓ | -0.023687  | 0.78515   | 0.9938  | 1.0101  | ↑ | 0.01443    | 0.3871   | 0.76154 | 1.0902  | ↑ | 0.12454   |
| P02748     | Complement component C9                                 | 0.27588   | 0.56126  | 1.1065  | ↑ | 0.14598    | 0.97868   | 0.9938  | 0.99214 | ↓ | -0.011385  | 0.85181  | 0.96402 | 1.0157  | ↑ | 0.022537  |
| A0A0C4DGF5 | Complement component receptor 1-like protein (Fragment) | 0.29699   | 0.58021  | 1.3134  | ↑ | 0.39334    | 0.87411   | 0.9938  | 1.3663  | ↑ | 0.45032    | 0.55488  | 0.85254 | 1.4805  | ↑ | 0.56606   |
| P08603     | Complement factor H                                     | 0.95136   | 0.97813  | 0.99455 | ↓ | -0.0078912 | 0.0036491 | 0.35883 | 1.2118  | ↑ | 0.27714    | 0.69848  | 0.91712 | 1.0257  | ↑ | 0.036632  |
| Q9BXR6     | Complement factor H-related protein 5                   | 0.53131   | 0.77673  | 1.0895  | ↓ | 0.12373    | 0.42195   | 0.9938  | 1.2474  | ↑ | 0.3189     | 0.33697  | 0.73166 | 1.1941  | ↑ | 0.25596   |
| E7ETH0     | Complement factor I                                     | 0.36621   | 0.66686  | 0.91283 | ↓ | -0.13158   | 0.39475   | 0.9938  | 1.1251  | ↑ | 0.17006    | 0.26546  | 0.68693 | 0.87682 | ↓ | -0.18964  |
| E9PDY4     | Complement receptor type 1                              | 0.66092   | 0.88072  | 1.3093  | ↑ | 0.38879    | 0.58259   | 0.9938  | 1.0173  | ↑ | 0.024733   | 0.85497  | 0.96402 | 0.81898 | ↓ | -0.29162  |
| P20023     | Complement receptor type 2                              | 0.5292    | 0.77673  | 0.88768 | ↓ | -0.17189   | 0.90169   | 0.9938  | 1.1229  | ↑ | 0.16721    | 0.88368  | 0.96773 | 1.0616  | ↑ | 0.086304  |
| A0A3B3ISR2 | Complement subcomponent C1r                             | 0.57948   | 0.81667  | 0.97373 | ↓ | -0.03841   | 0.23423   | 0.9198  | 1.1023  | ↓ | 0.14049    | 0.83393  | 0.96097 | 1.0277  | ↑ | 0.039425  |
| B4E3S0     | Coronin                                                 | 0.70525   | 0.90606  | 1.0465  | ↓ | 0.06553    | 0.87667   | 0.9938  | 0.89776 | ↓ | -0.1556    | 0.46918  | 0.81081 | 1.0536  | ↑ | 0.075355  |
| P31146     | Coronin-1A                                              | 0.23196   | 0.5145   | 1.2801  | ↑ | 0.35626    | 0.78351   | 0.9938  | 0.90981 | ↓ | -0.13636   | 0.10193  | 0.51697 | 0.71474 | ↓ | -0.4845   |
| P08185     | Corticosteroid-binding globulin                         | 0.72295   | 0.92324  | 0.67733 | ↓ | -0.56206   | 0.75083   | 0.9938  | 2.3542  | ↑ | 1.2352     | 0.49417  | 0.8205  | 0.73876 | ↓ | -0.43682  |
| P02741     | C-reactive protein                                      | 0.0046925 | 0.062232 | 7.8932  | ↓ | 2.9806     | 0.73655   | 0.9938  | 0.90751 | ↓ | -0.14002   | 0.62894  | 0.88242 | 0.66128 | ↓ | -0.59666  |
| P01034     | Cystatin-C                                              | 0.70052   | 0.90606  | 0.89823 | ↓ | -0.15484   | 0.69973   | 0.9938  | 1.0866  | ↑ | 0.11984    | 0.27507  | 0.68767 | 1.3873  | ↑ | 0.4723    |
| P32320     | Cytidine deaminase                                      | 0.11214   | 0.35226  | 0.75711 | ↓ | -0.40143   | 0.54587   | 0.9938  | 1.2365  | ↑ | 0.3063     | 0.47219  | 0.81081 | 1.2815  | ↑ | 0.3578    |
| P81605     | Dermcidin                                               | 0.45791   | 0.73013  | 1.1621  | ↑ | 0.21669    | 0.95364   | 0.9938  | 1.1177  | ↑ | 0.16055    | 0.97698  | 0.98969 | 1.4019  | ↑ | 0.48741   |

|            |                                                                  |             |           |         |   |            |           |         |         |   |           |           |          |         |   |           |
|------------|------------------------------------------------------------------|-------------|-----------|---------|---|------------|-----------|---------|---------|---|-----------|-----------|----------|---------|---|-----------|
| Q02413     | Desmoglein-1                                                     | 0.099321    | 0.34069   | 0.66671 | ↓ | -0.58487   | 0.16465   | 0.9198  | 1.334   | ↑ | 0.41581   | 0.091175  | 0.49373  | 1.308   | ↑ | 0.38739   |
| Q9UHL4     | Dipeptidyl peptidase 2                                           | 0.076526    | 0.31008   | 1.1166  | ↑ | 0.15914    | 0.86522   | 0.9938  | 1.1931  | ↑ | 0.25467   | 0.022195  | 0.34584  | 0.72732 | ↓ | -0.45933  |
| E5RIA2     | Ectonucleotide pyrophosphatase/phosphodiesterase family member 2 | 0.81377     | 0.95263   | 0.9653  | ↓ | -0.050953  | 0.70862   | 0.9938  | 0.95227 | ↓ | -0.070562 | 0.62327   | 0.88242  | 0.92725 | ↓ | -0.10897  |
| Q12805     | EGF-containing fibulin-like extracellular matrix protein 1       | 0.41479     | 0.7073    | 0.63016 | ↓ | -0.66621   | 0.20506   | 0.9198  | 1.5365  | ↑ | 0.61968   | 0.93651   | 0.98668  | 1.0478  | ↑ | 0.067367  |
| A0A0UIRQQ4 | Endothelial protein C receptor (Fragment)                        | 0.0063895   | 0.067367  | 0.61408 | ↓ | -0.70349   | 0.026548  | 0.87729 | 1.4067  | ↑ | 0.49234   | 0.077507  | 0.4928   | 1.3455  | ↑ | 0.4281    |
| O75715     | Epididymal secretory glutathione peroxidase                      | 0.22587     | 0.50802   | 1.6387  | ↑ | 0.71254    | 0.18129   | 0.9198  | 1.1041  | ↑ | 0.14287   | 0.47274   | 0.81081  | 1.0731  | ↑ | 0.10184   |
| Q9UBQ6     | Exostosin-like 2                                                 | 0.79342     | 0.94432   | 0.90283 | ↓ | -0.14747   | 0.32467   | 0.95351 | 1.1782  | ↑ | 0.23654   | 0.54985   | 0.85254  | 1.1297  | ↑ | 0.17592   |
| Q16610     | Extracellular matrix protein 1                                   | 0.0037489   | 0.055194  | 0.74022 | ↓ | -0.43398   | 0.031898  | 0.87729 | 1.4277  | ↑ | 0.51369   | 0.050565  | 0.45202  | 1.2588  | ↑ | 0.33199   |
| P08294     | Extracellular superoxide dismutase [Cu-Zn]                       | 0.84933     | 0.96049   | 0.96432 | ↓ | -0.052417  | 0.13107   | 0.9198  | 1.2254  | ↑ | 0.29321   | 0.75355   | 0.9325   | 0.94331 | ↓ | -0.084193 |
| Q86UX7     | Fermitin family homolog 3                                        | 0.000033551 | 0.0017901 | 1.2602  | ↓ | 0.33368    | 0.98083   | 0.9938  | 1.0857  | ↑ | 0.11863   | 0.0074097 | 0.22529  | 0.78095 | ↓ | -0.35669  |
| C9JC68     | Fetuin-B (Fragment)                                              | 0.78568     | 0.94218   | 0.99687 | ↓ | -0.0045219 | 0.76791   | 0.9938  | 1.0022  | ↑ | 0.0032239 | 0.74704   | 0.9325   | 1.0015  | ↑ | 0.0022077 |
| P02671     | Fibrinogen alpha chain                                           | 0.0088503   | 0.074596  | 1.1634  | ↑ | 0.21831    | 0.099552  | 0.87729 | 0.89618 | ↓ | -0.15814  | 0.11643   | 0.54775  | 0.8959  | ↓ | -0.15859  |
| P02675     | Fibrinogen beta chain                                            | 0.95417     | 0.97813   | 1.0134  | ↑ | 0.019243   | 0.60546   | 0.9938  | 1.0746  | ↑ | 0.10378   | 0.30933   | 0.72422  | 0.80304 | ↓ | -0.31645  |
| C9JC84     | Fibrinogen gamma chain                                           | 0.082606    | 0.32463   | 1.2054  | ↑ | 0.26948    | 0.27126   | 0.9198  | 0.87186 | ↓ | -0.19783  | 0.031815  | 0.39106  | 0.73333 | ↓ | -0.44747  |
| P02751     | Fibronectin                                                      | 0.000011379 | 0.0016785 | 0.54181 | ↓ | -0.88413   | 0.046954  | 0.87729 | 1.2662  | ↑ | 0.34055   | 0.080184  | 0.4928   | 1.2519  | ↑ | 0.3241    |
| H0Y4K8     | Fibronectin (Fragment)                                           | 0.60483     | 0.83853   | 0.83444 | ↓ | -0.26111   | 0.67168   | 0.9938  | 0.89779 | ↓ | -0.15556  | 0.46971   | 0.81081  | 2.2452  | ↑ | 1.1669    |
| P23142     | Fibulin-1                                                        | 0.14366     | 0.39609   | 0.85991 | ↓ | -0.21774   | 0.50952   | 0.9938  | 1.0717  | ↑ | 0.099856  | 0.087449  | 0.49373  | 1.2005  | ↑ | 0.2636    |
| A0A087WVE2 | Ficolin-1                                                        | 0.66553     | 0.88072   | 1.1796  | ↑ | 0.23833    | 0.61401   | 0.9938  | 0.61764 | ↓ | -0.69516  | 0.06545   | 0.45971  | 0.28139 | ↓ | -1.8293   |
| Q15485     | Ficolin-2                                                        | 0.2614      | 0.55081   | 1.3751  | ↑ | 0.45952    | 0.59213   | 0.9938  | 0.79034 | ↓ | -0.33946  | 0.35355   | 0.73166  | 0.83198 | ↓ | -0.26538  |
| O75636     | Ficolin-3                                                        | 0.29004     | 0.57433   | 1.4834  | ↑ | 0.56888    | 0.31861   | 0.95351 | 0.60027 | ↓ | -0.73632  | 0.45975   | 0.81081  | 0.81542 | ↓ | -0.29439  |
| P21333     | Filamin-A                                                        | 0.069718    | 0.29807   | 1.2573  | ↑ | 0.33035    | 0.5777    | 0.9938  | 0.92227 | ↓ | -0.11674  | 0.027933  | 0.37456  | 0.7471  | ↓ | -0.42062  |
| P04075     | Fructose-bisphosphate aldolase A                                 | 0.00051303  | 0.013758  | 1.6925  | ↑ | 0.75914    | 0.65417   | 0.9938  | 0.97283 | ↓ | -0.039742 | 0.0076371 | 0.22529  | 0.69647 | ↓ | -0.52187  |
| P09972     | Fructose-bisphosphate aldolase C                                 | 0.0028895   | 0.044863  | 2.6353  | ↑ | 1.3979     | 0.78881   | 0.9938  | 1.3558  | ↑ | 0.43913   | 0.29179   | 0.69981  | 0.71782 | ↓ | -0.47831  |
| Q08380     | Galectin-3-binding protein                                       | 0.0077213   | 0.071305  | 0.8178  | ↓ | -0.29018   | 0.0058857 | 0.43407 | 1.2227  | ↑ | 0.29012   | 0.052707  | 0.45202  | 1.2004  | ↑ | 0.26357   |
| D6RF35     | Gc-globulin                                                      | 0.0078846   | 0.071305  | 0.88621 | ↓ | -0.17428   | 0.65687   | 0.9938  | 1.0392  | ↑ | 0.055508  | 0.035736  | 0.42169  | 1.0993  | ↑ | 0.13665   |
| P06396     | Gelsolin                                                         | 0.32282     | 0.61839   | 0.94266 | ↓ | -0.085189  | 0.67656   | 0.9938  | 0.9693  | ↓ | -0.044986 | 0.59168   | 0.87223  | 0.96107 | ↓ | -0.057292 |
| MOQX47     | Glia maturation factor gamma                                     | 0.0013083   | 0.027569  | 1.7641  | ↑ | 0.81893    | 0.23023   | 0.9198  | 0.82406 | ↓ | -0.27918  | 0.0019492 | 0.082146 | 0.51636 | ↓ | -0.95356  |
| A0A2R8Y7X9 | GLOBIN domain-containing protein                                 | 0.034462    | 0.18826   | 2.5488  | ↑ | 1.3498     | 0.52292   | 0.9938  | 2.0758  | ↑ | 1.0537    | 0.071145  | 0.48809  | 0.30871 | ↓ | -1.6957   |
| A0A0J9YXP8 | Glucose-6-phosphate isomerase (Fragment)                         | 0.68477     | 0.89522   | 1.0819  | ↑ | 1.1352     | 0.83702   | 0.9938  | 1.0939  | ↑ | 0.12942   | 0.55208   | 0.85254  | 0.88875 | ↓ | -0.17015  |
| A0A087X1J7 | Glutathione peroxidase                                           | 0.049414    | 0.23138   | 1.3206  | ↑ | 0.40118    | 0.057836  | 0.87729 | 1.5911  | ↑ | 0.66998   | 0.73466   | 0.9325   | 1.2633  | ↑ | 0.33717   |
| P09211     | Glutathione S-transferase P                                      | 0.24174     | 0.52437   | 1.6225  | ↑ | 0.69822    | 0.61125   | 0.9938  | 1.062   | ↑ | 0.086819  | 0.12858   | 0.5747   | 0.54769 | ↓ | -0.86857  |
| E7EUT5     | Glyceraldehyde-3-phosphate dehydrogenase                         | 0.10332     | 0.35032   | 1.512   | ↑ | 0.59643    | 0.66212   | 0.9938  | 0.92246 | ↓ | -0.11645  | 0.045691  | 0.45202  | 0.46871 | ↓ | -1.0932   |
| A0A0C4DGZ8 | Glycoprotein Ib (Platelet), alpha polypeptide                    | 0.87386     | 0.96049   | 0.94807 | ↓ | -0.076942  | 0.46339   | 0.9938  | 1.2315  | ↑ | 0.3004    | 0.54964   | 0.85254  | 1.0901  | ↑ | 0.12443   |
| P00738     | Haptoglobin                                                      | 0.000035044 | 0.0017901 | 2.8522  | ↑ | 1.5121     | 0.3095    | 0.95108 | 0.79435 | ↓ | -0.33215  | 0.22854   | 0.64747  | 0.75343 | ↓ | -0.40845  |
| P00739     | Haptoglobin-related protein                                      | 0.056143    | 0.25094   | 1.2881  | ↑ | 0.36526    | 0.26779   | 0.9198  | 0.84128 | ↓ | -0.24935  | 0.097198  | 0.50304  | 0.75128 | ↓ | -0.41258  |
| G3V1N2     | HCG1745306, isoform CRA_a                                        | 0.63969     | 0.87282   | 1.0315  | ↑ | 0.044799   | 0.22011   | 0.9198  | 1.4311  | ↑ | 0.51716   | 0.9667    | 0.98969  | 0.58002 | ↓ | -0.75882  |
| E9PK3      | Heat shock cognate 71 kDa protein                                | 0.16442     | 0.42925   | 1.2076  | ↑ | 0.27211    | 0.96766   | 0.9938  | 1.0266  | ↑ | 0.037915  | 0.089591  | 0.49373  | 0.77586 | ↓ | -0.36613  |
| P69905     | Hemoglobin subunit alpha                                         | 0.18692     | 0.4694    | 1.0944  | ↑ | 0.13018    | 0.53637   | 0.9938  | 3.4158  | ↑ | 1.7722    | 0.057603  | 0.45202  | 0.78636 | ↓ | -0.34674  |
| P68871     | Hemoglobin subunit beta                                          | 0.006867    | 0.069854  | 1.6047  | ↑ | 0.68228    | 0.66074   | 0.9938  | 1.5986  | ↑ | 0.67682   | 0.018248  | 0.31666  | 0.5836  | ↓ | -0.77695  |
| P02042     | Hemoglobin subunit delta                                         | 0.011574    | 0.087544  | 1.3919  | ↑ | 0.4771     | 0.6348    | 0.9938  | 3.2108  | ↑ | 1.683     | 0.13513   | 0.58624  | 0.68669 | ↓ | -0.54228  |
| P02790     | Hemopexin                                                        | 0.00027939  | 0.0098998 | 1.33    | ↑ | 0.41146    | 0.68405   | 0.9938  | 0.98192 | ↓ | -0.026327 | 0.065018  | 0.45971  | 0.85196 | ↓ | -0.23114  |
| P05546     | Heparin cofactor 2                                               | 0.27883     | 0.56339   | 0.91036 | ↓ | -0.13549   | 0.32437   | 0.95351 | 1.1033  | ↓ | 0.14182   | 0.62369   | 0.88242  | 1.0386  | ↑ | 0.054589  |
| Q04756     | Hepatocyte growth factor activator                               | 0.49717     | 0.75295   | 0.92283 | ↓ | -0.11586   | 0.82454   | 0.9938  | 0.9745  | ↓ | -0.037259 | 0.24143   | 0.64747  | 1.1305  | ↑ | 0.17699   |
| G3XAK1     | Hepatocyte growth factor-like protein                            | 0.94873     | 0.97813   | 1.0063  | ↓ | 0.0091314  | 0.97452   | 0.9938  | 1.0189  | ↑ | 0.027011  | 0.79866   | 0.94798  | 0.9807  | ↓ | -0.028123 |
| P04196     | Histidine-rich glycoprotein                                      | 0.0054536   | 0.067013  | 0.68573 | ↓ | -0.54429   | 0.90478   | 0.9938  | 1.0046  | ↑ | 0.0066487 | 0.10339   | 0.51697  | 1.2098  | ↑ | 0.2748    |
| Q14520     | Hyaluronan-binding protein 2                                     | 0.81877     | 0.95289   | 1.023   | ↑ | 0.03287    | 0.93209   | 0.9938  | 0.98937 | ↓ | -0.015413 | 0.73184   | 0.9325   | 0.95752 | ↓ | -0.062628 |
| A0A087WXI2 | IgGfC-binding protein                                            | 0.46656     | 0.73211   | 0.91694 | ↓ | -0.12509   | 0.94559   | 0.9938  | 0.99124 | ↓ | -0.012688 | 0.77258   | 0.93531  | 0.95372 | ↓ | -0.06837  |
| A0A0G2JMB2 | Immunoglobulin heavy constant alpha 2 (Fragment)                 | 0.8245      | 0.95289   | 0.80646 | ↓ | -0.31033   | 0.23833   | 0.9198  | 0.69233 | ↓ | -0.53047  | 0.44755   | 0.80504  | 1.7102  | ↑ | 0.7742    |
| P01871     | Immunoglobulin heavy constant mu                                 | 0.7308      | 0.92526   | 0.94297 | ↓ | -0.084714  | 0.86977   | 0.9938  | 1.0329  | ↑ | 0.046665  | 0.33345   | 0.73166  | 0.86264 | ↓ | -0.21316  |
| A0A0B4J2H0 | Immunoglobulin heavy variable 1-69D                              | 0.28271     | 0.56734   | 0.85116 | ↓ | -0.2325    | 0.75559   | 0.9938  | 1.1029  | ↑ | 0.14131   | 0.16013   | 0.58994  | 1.2628  | ↑ | 0.33658   |
| A0A075B7D8 | Immunoglobulin heavy variable 3/OR15-7 (pseudogene) (Fragment)   | 0.2124      | 0.50113   | 0.74959 | ↓ | -0.41583   | 0.79829   | 0.9938  | 0.97966 | ↓ | -0.029652 | 0.62701   | 0.88242  | 1.1136  | ↑ | 0.15521   |
| A0A4W8ZXM2 | Immunoglobulin heavy variable 3-72                               | 0.095249    | 0.33854   | 0.67583 | ↓ | -0.56527   | 0.092218  | 0.87729 | 1.4496  | ↑ | 0.53569   | 0.16142   | 0.58994  | 1.7072  | ↑ | 0.77166   |
| A0A075B6R2 | Immunoglobulin heavy variable 4-4                                | 0.49634     | 0.75295   | 0.88111 | ↓ | -0.1826    | 0.60374   | 0.9938  | 0.96425 | ↓ | -0.052522 | 0.37435   | 0.7564   | 1.5191  | ↑ | 0.60319   |
| D6RD17     | Immunoglobulin J chain (Fragment)                                | 0.5426      | 0.78464   | 1.3451  | ↑ | 0.4277     | 0.80193   | 0.9938  | 0.85112 | ↓ | -0.23256  | 0.27452   | 0.68767  | 0.65773 | ↓ | -0.60443  |
| A0A5H1ZRQ3 | Immunoglobulin kappa constant (Fragment)                         | 0.52179     | 0.7765    | 2.6946  | ↑ | 1.43       | 0.50079   | 0.9938  | 0.38949 | ↓ | -1.3603   | 0.6132    | 0.88241  | 0.41953 | ↓ | -1.2532   |
| A0A075B6P5 | Immunoglobulin kappa variable 2-28                               | 0.37468     | 0.67081   | 0.71902 | ↓ | -0.4759    | 0.65374   | 0.9938  | 0.93616 | ↓ | -0.09518  | 0.87633   | 0.96773  | 0.78044 | ↓ | -0.35764  |
| P0CF74     | Immunoglobulin lambda constant 6                                 | 0.2545      | 0.54404   | 1.1796  | ↑ | 0.23827    | 0.49993   | 0.9938  | 0.79394 | ↓ | -0.33291  | 0.4531    | 0.81008  | 0.88335 | ↓ | -0.17895  |
| A0A075B6K5 | Immunoglobulin lambda variable 3-9                               | 0.52381     | 0.7765    | 1.081   | ↑ | 0.11236    | 0.8614    | 0.9938  | 0.99242 | ↓ | -0.010976 | 0.45955   | 0.81081  | 0.86977 | ↓ | -0.2013   |
| P15814     | Immunoglobulin lambda-like polypeptide 1                         | 0.078092    | 0.31131   | 1.4801  | ↑ | 0.56567    | 0.16876   | 0.9198  | 0.51302 | ↓ | -0.9629   | 0.63594   | 0.88242  | 1.1483  | ↑ | 0.19955   |

|            |                                                                        |            |           |         |   |           |          |         |         |   |            |           |         |         |   |            |
|------------|------------------------------------------------------------------------|------------|-----------|---------|---|-----------|----------|---------|---------|---|------------|-----------|---------|---------|---|------------|
| P05019     | Insulin-like growth factor I                                           | 0.42879    | 0.7139    | 1.1152  | ↑ | 0.15731   | 0.79608  | 0.9938  | 0.94401 | ↓ | -0.083125  | 0.66544   | 0.90882 | 0.93292 | ↓ | -0.10018   |
| P01344     | Insulin-like growth factor II                                          | 0.047148   | 0.22801   | 1.346   | ↑ | 0.42867   | 0.14328  | 0.9198  | 0.77821 | ↓ | -0.36178   | 0.2245    | 0.64747 | 0.81415 | ↓ | -0.29664   |
| P18065     | Insulin-like growth factor-binding protein 2                           | 0.089325   | 0.32939   | 0.68775 | ↓ | -0.54005  | 0.1363   | 0.9198  | 1.327   | ↑ | 0.40819    | 0.6995    | 0.91712 | 1.0748  | ↑ | 0.10412    |
| A6XND0     | Insulin-like growth factor-binding protein 3                           | 0.68583    | 0.89522   | 1.0116  | ↑ | 0.016592  | 0.06246  | 0.87729 | 1.1552  | ↓ | 0.20813    | 0.4248    | 0.79314 | 1.0742  | ↑ | 0.1032     |
| A0A3B3IUE0 | Insulin-like growth factor-binding protein 6                           | 0.1859     | 0.4694    | 1.1721  | ↑ | 0.22915   | 0.58763  | 0.9938  | 0.93218 | ↓ | -0.10132   | 0.51502   | 0.82879 | 0.91296 | ↓ | -0.13137   |
| P35858     | Insulin-like growth factor-binding protein complex acid labile subunit | 0.11982    | 0.36057   | 0.86048 | ↓ | -0.21679  | 0.50403  | 0.9938  | 1.0706  | ↑ | 0.098378   | 0.6063    | 0.87676 | 1.0672  | ↓ | 0.09387    |
| P19827     | Inter-alpha-trypsin inhibitor heavy chain H1                           | 0.56961    | 0.81176   | 0.95703 | ↓ | -0.063369 | 0.73575  | 0.9938  | 0.97661 | ↓ | -0.03415   | 0.95435   | 0.98969 | 0.99614 | ↓ | -0.0055826 |
| P19823     | Inter-alpha-trypsin inhibitor heavy chain H2                           | 0.13532    | 0.38701   | 0.89998 | ↓ | -0.15204  | 0.91237  | 0.9938  | 1.0111  | ↑ | 0.015924   | 0.41686   | 0.78327 | 1.0606  | ↑ | 0.08486    |
| A0A087WW43 | Inter-alpha-trypsin inhibitor heavy chain H3                           | 0.21404    | 0.50113   | 1.1054  | ↑ | 0.1446    | 0.97975  | 0.9938  | 0.99375 | ↓ | -0.0090386 | 0.44623   | 0.80504 | 0.92361 | ↓ | -0.11464   |
| Q9NPH3     | Interleukin-1 receptor accessory protein                               | 0.073153   | 0.30394   | 0.73985 | ↓ | -0.4347   | 0.21803  | 0.9198  | 1.4241  | ↑ | 0.51006    | 0.064437  | 0.45971 | 1.2256  | ↑ | 0.29353    |
| P27930     | Interleukin-1 receptor type 2                                          | 0.62997    | 0.86437   | 1.0237  | ↑ | 0.033806  | 0.072346 | 0.87729 | 1.3186  | ↑ | 0.39902    | 0.68117   | 0.91712 | 1.065   | ↑ | 0.090814   |
| B7ZKJ8     | ITIH4 protein                                                          | 0.00033559 | 0.0098998 | 1.2714  | ↑ | 0.34638   | 0.83384  | 0.9938  | 1.041   | ↑ | 0.058034   | 0.20388   | 0.64747 | 0.92008 | ↓ | -0.12017   |
| P29622     | Kallistatin                                                            | 0.11331    | 0.35226   | 1.2801  | ↑ | 0.3562    | 0.83257  | 0.9938  | 1.0864  | ↑ | 0.11954    | 0.12649   | 0.57407 | 0.76328 | ↓ | -0.38971   |
| A0A1B0GVI3 | Keratin, type I cytoskeletal 10                                        | 0.97966    | 0.9901    | 0.93781 | ↓ | -0.092634 | 0.77694  | 0.9938  | 0.9782  | ↓ | -0.031791  | 0.87684   | 0.96773 | 1.0464  | ↑ | 0.065484   |
| P08779     | Keratin, type I cytoskeletal 16                                        | 0.37943    | 0.67081   | 0.7532  | ↓ | -0.67089  | 0.52605  | 0.9938  | 1.2297  | ↑ | 0.29834    | 0.23882   | 0.64747 | 0.93659 | ↓ | -0.094506  |
| P35527     | Keratin, type I cytoskeletal 9                                         | 0.16417    | 0.42925   | 0.4111  | ↓ | -1.2824   | 0.24283  | 0.9198  | 1.1898  | ↑ | 0.25067    | 0.97321   | 0.98969 | 1.0106  | ↑ | 0.015243   |
| P04264     | Keratin, type II cytoskeletal 1                                        | 0.1056     | 0.35111   | 0.45112 | ↓ | -1.1484   | 0.17471  | 0.9198  | 1.4     | ↑ | 0.48545    | 0.71739   | 0.93229 | 1.0745  | ↑ | 0.10368    |
| P35908     | Keratin, type II cytoskeletal 2 epidermal                              | 0.21785    | 0.50274   | 0.85114 | ↓ | -0.23253  | 0.24322  | 0.9198  | 1.1221  | ↑ | 0.16624    | 0.48013   | 0.81871 | 0.94289 | ↓ | -0.084842  |
| P13647     | Keratin, type II cytoskeletal 5                                        | 0.12713    | 0.37131   | 0.79073 | ↓ | -0.33875  | 0.21424  | 0.9198  | 1.6839  | ↑ | 0.75179    | 0.98298   | 0.98969 | 1.001   | ↑ | 0.0014292  |
| P02538     | Keratin, type II cytoskeletal 6A                                       | 0.11008    | 0.35226   | 0.87699 | ↓ | -0.18936  | 0.24403  | 0.9198  | 1.1484  | ↑ | 0.19963    | 0.35516   | 0.73166 | 1.0484  | ↑ | 0.068213   |
| P04259     | Keratin, type II cytoskeletal 6B                                       | 0.89089    | 0.96049   | 1.0057  | ↓ | 0.0082654 | 0.96575  | 0.9938  | 1.0578  | ↑ | 0.081072   | 0.4409    | 0.80288 | 0.86509 | ↓ | -0.20908   |
| P01042     | Kininogen-1                                                            | 0.22723    | 0.50802   | 0.93516 | ↓ | -0.09671  | 0.35615  | 0.95409 | 1.0935  | ↑ | 0.12898    | 0.84779   | 0.96402 | 0.99262 | ↓ | -0.010687  |
| E7EQB2     | Lactotransferrin (Fragment)                                            | 0.21185    | 0.50113   | 1.1439  | ↑ | 0.19398   | 0.59298  | 0.9938  | 0.92635 | ↓ | -0.11037   | 0.030501  | 0.39106 | 0.6419  | ↓ | -0.63958   |
| C9JD84     | Latent-transforming growth factor beta-binding protein 1               | 0.98339    | 0.9901    | 0.96646 | ↓ | -0.049225 | 0.26463  | 0.9198  | 0.83298 | ↓ | -0.26365   | 0.94149   | 0.9884  | 1.0012  | ↑ | 0.0017212  |
| P02750     | Leucine-rich alpha-2-glycoprotein                                      | 0.0015705  | 0.029515  | 1.4133  | ↑ | 0.49904   | 0.52746  | 0.9938  | 0.93381 | ↓ | -0.098795  | 0.43719   | 0.80288 | 0.92014 | ↓ | -0.12007   |
| A0A3B3IS95 | L-lactate dehydrogenase                                                | 0.10712    | 0.35111   | 1.7057  | ↑ | 0.77038   | 0.49607  | 0.9938  | 0.80553 | ↓ | -0.312     | 0.53548   | 0.84928 | 0.80248 | ↓ | -0.31746   |
| C9JC71     | Low affinity immunoglobulin gamma Fc region receptor III-A (Fragment)  | 0.12653    | 0.37131   | 1.176   | ↑ | 0.23384   | 0.39209  | 0.9938  | 1.0039  | ↑ | 0.0055857  | 0.76181   | 0.9325  | 2.5942  | ↑ | 1.3753     |
| P51884     | Lumican                                                                | 0.020225   | 0.12694   | 0.85749 | ↓ | -0.22182  | 0.65625  | 0.9938  | 1.0511  | ↑ | 0.071848   | 0.23823   | 0.64747 | 1.076   | ↑ | 0.10563    |
| E9PEK4     | Macrophage colony-stimulating factor 1 receptor                        | 0.92253    | 0.97813   | 1.1618  | ↑ | 0.21639   | 0.88891  | 0.9938  | 0.81438 | ↓ | -0.29622   | 0.48974   | 0.8205  | 1.0811  | ↑ | 0.11248    |
| P48740     | Mannan-binding lectin serine protease 1                                | 0.75822    | 0.93901   | 0.96799 | ↓ | -0.046942 | 0.64269  | 0.9938  | 1.0535  | ↑ | 0.07516    | 0.57868   | 0.87223 | 1.0331  | ↑ | 0.04702    |
| O00187     | Mannan-binding lectin serine protease 2                                | 0.3862     | 0.67815   | 1.082   | ↑ | 0.11368   | 0.93983  | 0.9938  | 0.98288 | ↓ | -0.024907  | 0.71042   | 0.92732 | 0.95751 | ↓ | -0.062643  |
| P33908     | Mannosyl-oligosaccharide 1,2-alpha-mannosidase IA                      | 0.80247    | 0.94756   | 1.0577  | ↑ | 0.080992  | 0.34699  | 0.95351 | 1.2532  | ↑ | 0.3256     | 0.40173   | 0.76954 | 0.86658 | ↓ | -0.2066    |
| Q16853     | Membrane primary amine oxidase                                         | 0.041249   | 0.2173    | 0.76547 | ↓ | -0.38559  | 0.42394  | 0.9938  | 1.1007  | ↑ | 0.13838    | 0.33174   | 0.73166 | 1.1944  | ↑ | 0.25623    |
| P08571     | Monocyte differentiation antigen CD14                                  | 0.083635   | 0.32463   | 0.86292 | ↓ | -0.2127   | 0.29405  | 0.95108 | 1.101   | ↑ | 0.13885    | 0.22163   | 0.64747 | 1.1578  | ↑ | 0.2114     |
| P03971     | Muellerian-inhibiting factor                                           | 0.89023    | 0.96049   | 0.96342 | ↓ | -0.053763 | 0.49574  | 0.9938  | 0.92509 | ↓ | -0.11233   | 0.75113   | 0.9325  | 1.0849  | ↑ | 0.1176     |
| Q7Z7M0     | Multiple epidermal growth factor-like domains protein 8                | 0.33097    | 0.62991   | 0.88403 | ↓ | -0.17783  | 0.43815  | 0.9938  | 1.0905  | ↑ | 0.125      | 0.75267   | 0.9325  | 0.94992 | ↓ | -0.074127  |
| P05164     | Myeloperoxidase                                                        | 0.21255    | 0.50113   | 0.84231 | ↓ | -0.24758  | 0.23104  | 0.9198  | 1.1866  | ↑ | 0.24683    | 0.30503   | 0.72375 | 1.2723  | ↑ | 0.34741    |
| F8W1R7     | Myosin light polypeptide 6                                             | 0.1464     | 0.39988   | 0.85719 | ↓ | -0.22231  | 0.60854  | 0.9938  | 1.0767  | ↑ | 0.10661    | 0.25907   | 0.67634 | 1.2213  | ↑ | 0.28838    |
| P12882     | Myosin-1                                                               | 0.23532    | 0.51807   | 1.2647  | ↑ | 0.33876   | 0.28187  | 0.93836 | 1.703   | ↑ | 0.7681     | 0.21298   | 0.64747 | 0.77339 | ↓ | -0.37073   |
| P35579     | Myosin-9                                                               | 0.015384   | 0.10315   | 1.1356  | ↑ | 0.18343   | 0.065089 | 0.87729 | 0.90176 | ↓ | -0.14919   | 0.235     | 0.64747 | 0.93026 | ↓ | -0.1043    |
| Q96PD5     | N-acetylmuramoyl-L-alanine amidase                                     | 0.22083    | 0.505     | 0.79483 | ↓ | -0.33128  | 0.26145  | 0.9198  | 1.1815  | ↑ | 0.2406     | 0.53176   | 0.84794 | 1.1231  | ↑ | 0.16755    |
| Q15223     | Nectin-1                                                               | 0.64767    | 0.87643   | 1.1327  | ↑ | 0.17974   | 0.67649  | 0.9938  | 0.86367 | ↓ | -0.21145   | 0.19836   | 0.64747 | 0.70333 | ↓ | -0.50773   |
| A0A087WTE4 | Neural cell adhesion molecule 1                                        | 0.066456   | 0.2926    | 1.1445  | ↑ | 0.19473   | 0.44742  | 0.9938  | 0.93511 | ↓ | -0.096791  | 0.23503   | 0.64747 | 0.88914 | ↓ | -0.16952   |
| A0A087X0M8 | Neural cell adhesion molecule L1-like protein                          | 0.85741    | 0.96049   | 0.9296  | ↓ | -0.10532  | 0.51674  | 0.9938  | 1.1127  | ↑ | 0.154      | 0.33859   | 0.73166 | 1.169   | ↑ | 0.22531    |
| P04746     | Pancreatic alpha-amylase                                               | 0.0016008  | 0.029515  | 3.3001  | ↑ | 1.7225    | 0.81303  | 0.9938  | 1.0713  | ↑ | 0.099339   | 0.68964   | 0.91712 | 0.92127 | ↓ | -0.11831   |
| O95497     | Pantetheinase                                                          | 0.87675    | 0.96049   | 0.98161 | ↓ | -0.026774 | 0.22677  | 0.9198  | 1.2106  | ↑ | 0.27569    | 0.60209   | 0.87496 | 1.069   | ↑ | 0.096254   |
| A0A1B0GU03 | Peptidase A1 domain-containing protein                                 | 0.13212    | 0.38212   | 1.5504  | ↑ | 0.63265   | 0.95865  | 0.9938  | 1.0137  | ↑ | 0.019629   | 0.67442   | 0.91263 | 0.83502 | ↓ | -0.26012   |
| P62937     | Peptidyl-prolyl cis-trans isomerase A                                  | 0.011157   | 0.08661   | 2.5123  | ↑ | 1.329     | 0.1148   | 0.87729 | 0.55192 | ↓ | -0.85748   | 0.0098654 | 0.24252 | 0.3758  | ↓ | -1.4119    |
| B1ALD9     | Periostin                                                              | 0.43076    | 0.7139    | 0.94436 | ↓ | -0.08259  | 0.33808  | 0.95351 | 1.1108  | ↑ | 0.15162    | 0.31731   | 0.73166 | 1.0767  | ↑ | 0.10668    |
| A0A0A0MRQ5 | Peroxioredoxin-1                                                       | 0.90975    | 0.97591   | 0.96827 | ↓ | -0.046517 | 0.85344  | 0.9938  | 1.196   | ↑ | 0.25821    | 0.17169   | 0.58994 | 0.8484  | ↓ | -0.23718   |
| P32119     | Peroxioredoxin-2                                                       | 0.80725    | 0.94876   | 0.86919 | ↓ | -0.20226  | 0.23754  | 0.9198  | 2.2107  | ↑ | 1.1445     | 0.02515   | 0.3533  | 0.73611 | ↓ | -0.44202   |
| P30041     | Peroxioredoxin-6                                                       | 0.27253    | 0.5587    | 0.85645 | ↓ | -0.22356  | 0.31338  | 0.95307 | 1.4299  | ↑ | 0.51593    | 0.74749   | 0.9325  | 1.2709  | ↑ | 0.34584    |
| P04180     | Phosphatidylcholine-sterol acyltransferase                             | 0.65661    | 0.88072   | 1.4979  | ↑ | 0.58294   | 0.67576  | 0.9938  | 0.66595 | ↓ | -0.58652   | 0.23406   | 0.64747 | 0.5346  | ↓ | -0.90346   |
| P80108     | Phosphatidylinositol-glycan-specific phospholipase D                   | 0.0080534  | 0.071305  | 0.78789 | ↓ | -0.34394  | 0.011577 | 0.68305 | 1.2312  | ↑ | 0.30011    | 0.14448   | 0.58994 | 1.2212  | ↑ | 0.28829    |
| P18669     | Phosphoglycerate mutase 1                                              | 0.18776    | 0.4694    | 2.0566  | ↑ | 1.0403    | 0.67737  | 0.9938  | 1.0895  | ↑ | 0.12366    | 0.4692    | 0.81081 | 0.55828 | ↓ | -0.84095   |
| P55058     | Phospholipid transfer protein                                          | 0.14333    | 0.39609   | 0.86645 | ↓ | -0.20681  | 0.21853  | 0.9198  | 1.1546  | ↑ | 0.20739    | 0.61757   | 0.88242 | 1.0314  | ↑ | 0.044628   |
| P36955     | Pigment epithelium-derived factor                                      | 0.29659    | 0.58021   | 0.94376 | ↓ | -0.083501 | 0.70523  | 0.9938  | 0.9795  | ↓ | -0.029881  | 0.91234   | 0.98138 | 1.0073  | ↑ | 0.01054    |
| H0YAC1     | Plasma kallikrein (Fragment)                                           | 0.77147    | 0.94043   | 1.0081  | ↑ | 0.011691  | 0.17759  | 0.9198  | 0.94262 | ↓ | -0.08525   | 0.49786   | 0.8205  | 0.96765 | ↓ | -0.047442  |
| A0A7I2V2D2 | Plasma protease C1 inhibitor                                           | 0.42005    | 0.71214   | 1.063   | ↑ | 0.088176  | 0.99698  | 0.99698 | 1.0014  | ↑ | 0.0020801  | 0.69758   | 0.91712 | 1.0193  | ↑ | 0.027531   |

|            |                                                             |            |           |         |   |           |           |         |         |   |             |             |           |         |   |           |
|------------|-------------------------------------------------------------|------------|-----------|---------|---|-----------|-----------|---------|---------|---|-------------|-------------|-----------|---------|---|-----------|
| P00747     | Plasminogen                                                 | 0.37974    | 0.67081   | 1.0498  | ↑ | 0.070083  | 0.61757   | 0.9938  | 0.96624 | ↓ | -0.049542   | 0.15657     | 0.58994   | 0.9099  | ↓ | -0.13623  |
| P13796     | Plastin-2                                                   | 0.016143   | 0.10582   | 1.2089  | ↑ | 0.27373   | 0.80444   | 0.9938  | 0.97965 | ↓ | -0.029666   | 0.14792     | 0.58994   | 0.86934 | ↓ | -0.202    |
| P02775     | Platelet basic protein                                      | 0.013386   | 0.096314  | 0.46171 | ↓ | -1.1149   | 0.30361   | 0.95108 | 1.4209  | ↑ | 0.50679     | 0.17175     | 0.58994   | 2.106   | ↑ | 1.0745    |
| P02776     | Platelet factor 4                                           | 0.94108    | 0.97813   | 1.013   | ↑ | 0.018684  | 0.82223   | 0.9938  | 0.9947  | ↓ | -0.0076624  | 0.63714     | 0.88242   | 0.9094  | ↓ | -0.13701  |
| P10720     | Platelet factor 4 variant                                   | 0.57925    | 0.81667   | 1.0266  | ↑ | 0.037888  | 0.37099   | 0.96852 | 1.2288  | ↑ | 0.29725     | 0.40825     | 0.777     | 1.1616  | ↑ | 0.21606   |
| P08567     | Pleckstrin                                                  | 0.00018931 | 0.0079782 | 2.3728  | ↑ | 1.2466    | 0.08689   | 0.87729 | 0.68149 | ↓ | -0.55324    | 0.000058676 | 0.0086546 | 0.35757 | ↓ | -1.4837   |
| P20742     | Pregnancy zone protein                                      | 0.015097   | 0.10315   | 0.77092 | ↓ | -0.37534  | 0.072446  | 0.87729 | 1.2758  | ↑ | 0.3514      | 0.32709     | 0.73166   | 1.2153  | ↑ | 0.28131   |
| F8W8W4     | Prenylcysteine oxidase 1                                    | 0.46038    | 0.73013   | 0.93505 | ↓ | -0.096885 | 0.25752   | 0.9198  | 1.1552  | ↑ | 0.20812     | 0.59517     | 0.87223   | 1.0686  | ↑ | 0.09566   |
| A0A075B6R9 | Probable non-functional immunoglobulin kappa variable 2D-24 | 0.43584    | 0.71429   | 0.81598 | ↓ | -0.2934   | 0.30726   | 0.95108 | 1.2174  | ↑ | 0.28385     | 0.49481     | 0.8205    | 1.128   | ↑ | 0.17378   |
| Q15113     | Procollagen C-endopeptidase enhancer 1                      | 0.0082182  | 0.071305  | 0.5133  | ↓ | -0.96214  | 0.5202    | 0.9938  | 1.1478  | ↑ | 0.19891     | 0.96524     | 0.98969   | 1.145   | ↑ | 0.19529   |
| P07737     | Profilin-1                                                  | 0.0026431  | 0.043317  | 3.0512  | ↑ | 1.6094    | 0.11584   | 0.87729 | 0.71993 | ↓ | -0.47407    | 0.00055806  | 0.041157  | 0.23165 | ↓ | -2.11     |
| P12273     | Prolactin-inducible protein                                 | 0.75037    | 0.93714   | 1.518   | ↑ | 0.60219   | 0.41388   | 0.9938  | 0.89227 | ↓ | -0.16445    | 0.73481     | 0.9325    | 0.64417 | ↓ | -0.63448  |
| P02760     | Protein AMBP                                                | 0.51789    | 0.77552   | 0.95608 | ↓ | -0.064795 | 0.36489   | 0.96109 | 1.0937  | ↑ | 0.12925     | 0.35474     | 0.73166   | 1.0737  | ↑ | 0.10259   |
| P05109     | Protein S100-A8                                             | 0.45952    | 0.73013   | 1.1436  | ↑ | 0.19364   | 0.42716   | 0.9938  | 3.1668  | ↑ | 1.663       | 0.75935     | 0.9325    | 0.93457 | ↓ | -0.097631 |
| P06702     | Protein S100-A9                                             | 0.49771    | 0.75295   | 1.1249  | ↑ | 0.16983   | 0.23745   | 0.9198  | 1.4764  | ↑ | 0.56212     | 0.93591     | 0.98668   | 1.4905  | ↑ | 0.57578   |
| G3V2W1     | Protein Z-dependent protease inhibitor                      | 0.15744    | 0.42487   | 1.079   | ↑ | 0.10971   | 0.10819   | 0.87729 | 0.86331 | ↓ | -0.21204    | 0.083662    | 0.49373   | 0.86494 | ↓ | -0.20932  |
| Q92954     | Proteoglycan 4                                              | 0.046885   | 0.22801   | 1.1818  | ↑ | 0.24096   | 0.92944   | 0.9938  | 1.0348  | ↑ | 0.049396    | 0.7429      | 0.9325    | 1.0627  | ↑ | 0.087801  |
| P00734     | Prothrombin                                                 | 0.014965   | 0.10315   | 0.83263 | ↓ | -0.26425  | 0.64775   | 0.9938  | 0.97886 | ↓ | -0.03083    | 0.65079     | 0.89295   | 1.0803  | ↑ | 0.11137   |
| Q9NPG4     | Protocadherin-12                                            | 0.64204    | 0.87282   | 1.0476  | ↑ | 0.067082  | 0.60329   | 0.9938  | 1.0967  | ↑ | 0.13318     | 0.28791     | 0.69981   | 1.2901  | ↑ | 0.36748   |
| Q16609     | Putative apolipoprotein(a)-like protein 2                   | 0.75101    | 0.93714   | 0.89948 | ↓ | -0.15283  | 0.90725   | 0.9938  | 1.0484  | ↑ | 0.068144    | 0.66944     | 0.91007   | 0.87113 | ↓ | -0.19903  |
| Q6ZMU1     | Putative protein C3P1                                       | 0.18555    | 0.4694    | 1.2382  | ↑ | 0.30829   | 0.43061   | 0.9938  | 0.84231 | ↓ | -0.24757    | 0.29046     | 0.69981   | 0.80983 | ↓ | -0.30432  |
| Q6UXR4     | Putative serpin A13                                         | 0.87539    | 0.96049   | 0.90002 | ↓ | -0.15196  | 0.92592   | 0.9938  | 1.0098  | ↑ | 0.01412     | 0.8882      | 0.96773   | 1.0813  | ↑ | 0.11275   |
| A0A804F6T5 | Pyruvate kinase PKM                                         | 0.20827    | 0.50113   | 0.90266 | ↓ | -0.14774  | 0.052949  | 0.87729 | 1.2371  | ↑ | 0.30692     | 0.25756     | 0.67634   | 1.0975  | ↑ | 0.13427   |
| A6NIZ1     | Ras-related protein Rap-1b-like protein                     | 0.039885   | 0.21393   | 1.5865  | ↑ | 0.66583   | 0.76654   | 0.9938  | 1.1321  | ↑ | 0.17899     | 0.16456     | 0.58994   | 0.6767  | ↓ | -0.56341  |
| P23470     | Receptor-type tyrosine-protein phosphatase gamma            | 0.82691    | 0.95289   | 0.96219 | ↓ | -0.055604 | 0.45162   | 0.9938  | 1.1686  | ↑ | 0.22479     | 0.77501     | 0.93531   | 1.1127  | ↑ | 0.15404   |
| P02753     | Retinol-binding protein 4                                   | 0.46283    | 0.73013   | 0.94996 | ↓ | -0.074061 | 0.40389   | 0.9938  | 0.93106 | ↓ | -0.10305    | 0.038395    | 0.43563   | 0.84903 | ↓ | -0.2361   |
| O95980     | Reversion-inducing cysteine-rich protein with Kazal motifs  | 0.36351    | 0.66606   | 0.8457  | ↓ | -0.24179  | 0.074896  | 0.87729 | 1.4183  | ↑ | 0.50411     | 0.24416     | 0.64888   | 1.2683  | ↑ | 0.34292   |
| J3KRE2     | Rho GDP-dissociation inhibitor 1                            | 0.34669    | 0.65142   | 1.294   | ↑ | 0.37184   | 0.54498   | 0.9938  | 0.82186 | ↓ | -0.28304    | 0.16382     | 0.58994   | 0.68101 | ↓ | -0.55425  |
| A0A096LPE2 | SAA2-SAA4 readthrough                                       | 0.022746   | 0.13694   | 4.849   | ↑ | 2.2777    | 0.97923   | 0.9938  | 0.73938 | ↓ | -0.43561    | 0.3898      | 0.76154   | 0.66206 | ↓ | -0.59497  |
| C9JHR8     | Scavenger receptor cysteine-rich type 1 protein M130        | 0.82256    | 0.95289   | 1.0238  | ↑ | 0.033939  | 0.92641   | 0.9938  | 1.0273  | ↑ | 0.03887     | 0.92552     | 0.98212   | 0.98517 | ↓ | -0.021559 |
| A0A182DWH7 | Selenoprotein P (Fragment)                                  | 0.29008    | 0.57433   | 0.91422 | ↓ | -0.12938  | 0.55401   | 0.9938  | 1.4948  | ↑ | 0.57995     | 0.013316    | 0.29825   | 0.3991  | ↓ | -1.3252   |
| P02787     | Serotransferrin                                             | 0.76712    | 0.93901   | 0.95666 | ↓ | -0.063924 | 0.4812    | 0.9938  | 1.0802  | ↑ | 0.11125     | 0.077644    | 0.4928    | 0.86101 | ↓ | -0.21589  |
| P02743     | Serum amyloid P-component                                   | 0.39567    | 0.68259   | 0.51953 | ↓ | -0.94472  | 0.30084   | 0.95108 | 1.8037  | ↑ | 0.85096     | 0.56448     | 0.8628    | 0.95367 | ↓ | -0.068436 |
| A0A0C4DGN2 | Sex hormone-binding globulin (Fragment)                     | 0.19384    | 0.47651   | 0.85356 | ↓ | -0.22843  | 0.23621   | 0.9198  | 1.1841  | ↑ | 0.24384     | 0.13469     | 0.58624   | 1.2271  | ↑ | 0.29522   |
| P09486     | SPARC                                                       | 0.96383    | 0.98384   | 0.94149 | ↓ | -0.086986 | 0.49605   | 0.9938  | 1.1916  | ↑ | 0.25291     | 0.76638     | 0.93422   | 1.0226  | ↑ | 0.03226   |
| O00391     | Sulphydryl oxidase 1                                        | 0.0063942  | 0.067367  | 0.74157 | ↓ | -0.43134  | 0.095832  | 0.87729 | 1.2078  | ↑ | 0.27235     | 0.15092     | 0.58994   | 1.175   | ↑ | 0.23269   |
| Q9Y490     | Talin-1                                                     | 0.032898   | 0.18663   | 1.1339  | ↑ | 0.18129   | 0.87876   | 0.9938  | 0.99115 | ↓ | -0.012829   | 0.058226    | 0.45202   | 0.88069 | ↓ | -0.1833   |
| A0A087WXC4 | Tenascin-N                                                  | 0.010904   | 0.08661   | 2.1731  | ↑ | 1.1198    | 0.0015679 | 0.2977  | 0.257   | ↓ | -1.9602     | 0.056389    | 0.45202   | 0.4867  | ↓ | -1.0389   |
| E9PHK0     | Tetranectin                                                 | 0.16903    | 0.43739   | 0.91481 | ↓ | -0.12845  | 0.94586   | 0.9938  | 0.99969 | ↓ | -0.00045415 | 0.85693     | 0.96402   | 1.0247  | ↑ | 0.035248  |
| P07996     | Thrombospondin-1                                            | 0.0011499  | 0.026094  | 0.81226 | ↓ | -0.29999  | 0.0020183 | 0.2977  | 1.2603  | ↑ | 0.33377     | 0.11823     | 0.54775   | 1.1392  | ↑ | 0.18803   |
| E7ES19     | Thrombospondin-4                                            | 0.43516    | 0.71429   | 0.83235 | ↓ | -0.26473  | 0.22069   | 0.9198  | 1.1168  | ↑ | 0.15933     | 0.74831     | 0.9325    | 1.0603  | ↑ | 0.084446  |
| P62328     | Thymosin beta-4                                             | 0.0039291  | 0.055194  | 2.1815  | ↑ | 1.1253    | 0.039778  | 0.87729 | 0.57548 | ↓ | -0.79716    | 0.0012221   | 0.072102  | 0.38146 | ↓ | -1.3904   |
| P05543     | Thyroxine-binding globulin                                  | 0.30873    | 0.59526   | 1.276   | ↑ | 0.35157   | 0.81776   | 0.9938  | 1.0156  | ↑ | 0.022386    | 0.218       | 0.64747   | 0.72418 | ↓ | -0.46558  |
| F2Z393     | Transaldolase                                               | 0.076731   | 0.31008   | 1.1122  | ↑ | 0.15345   | 0.9123    | 0.9938  | 1.0364  | ↑ | 0.05153     | 0.87368     | 0.96773   | 1.0901  | ↑ | 0.12441   |
| Q15582     | Transforming growth factor-beta-induced protein ig-h3       | 0.39121    | 0.68259   | 1.0473  | ↑ | 0.066738  | 0.79096   | 0.9938  | 1.0329  | ↑ | 0.046694    | 0.41455     | 0.78327   | 0.92567 | ↓ | -0.11143  |
| P37802     | Transgelin-2                                                | 0.044722   | 0.22779   | 1.5286  | ↑ | 0.61218   | 0.3039    | 0.95108 | 0.79626 | ↓ | -0.32868    | 0.015165    | 0.29825   | 0.57944 | ↓ | -0.78728  |
| A0A087WT59 | Transthyretin                                               | 0.087861   | 0.32939   | 1.5685  | ↑ | 0.64943   | 0.84995   | 0.9938  | 1.2931  | ↑ | 0.37078     | 0.014584    | 0.29825   | 0.48832 | ↓ | -1.0341   |
| O43280     | Trehalase                                                   | 0.24521    | 0.528     | 0.59094 | ↓ | -0.75891  | 0.054032  | 0.87729 | 2.3184  | ↑ | 1.2131      | 0.51694     | 0.82879   | 1.3398  | ↑ | 0.42202   |
| P60174     | Triosephosphate isomerase                                   | 0.054541   | 0.25092   | 1.8661  | ↑ | 0.90001   | 0.26252   | 0.9198  | 0.68971 | ↓ | -0.53593    | 0.080087    | 0.4928    | 0.55469 | ↓ | -0.85023  |
| P67936     | Tropomyosin alpha-4 chain                                   | 0.45329    | 0.73013   | 1.1605  | ↑ | 0.2148    | 0.84932   | 0.9938  | 0.98441 | ↓ | -0.022673   | 0.16634     | 0.58994   | 0.76006 | ↓ | -0.39582  |
| P68363     | Tubulin alpha-1B chain                                      | 0.121      | 0.36057   | 1.6275  | ↑ | 0.7027    | 0.66021   | 0.9938  | 0.9104  | ↓ | -0.13543    | 0.054451    | 0.45202   | 0.54244 | ↓ | -0.88248  |
| P68366     | Tubulin alpha-4A chain                                      | 0.10688    | 0.35111   | 1.6203  | ↑ | 0.69625   | 0.45401   | 0.9938  | 0.768   | ↓ | -0.38083    | 0.075825    | 0.4928    | 0.54015 | ↓ | -0.88857  |
| Q9H4B7     | Tubulin beta-1 chain                                        | 0.0056791  | 0.067013  | 1.414   | ↑ | 0.49978   | 0.076985  | 0.87729 | 0.79762 | ↓ | -0.32623    | 0.0015268   | 0.075066  | 0.64645 | ↓ | -0.62938  |
| Q6EMK4     | Vasorin                                                     | 0.34356    | 0.64968   | 0.80786 | ↓ | -0.30782  | 0.97132   | 0.9938  | 0.96059 | ↓ | -0.058001   | 0.34207     | 0.73166   | 1.349   | ↑ | 0.43192   |
| A0A7I2V2Y2 | Vesicle-fusing ATPase                                       | 0.53554    | 0.77825   | 1.4893  | ↑ | 0.57463   | 0.20758   | 0.9198  | 0.38641 | ↓ | -1.3718     | 0.78676     | 0.93965   | 0.78742 | ↓ | -0.34479  |
| P18206     | Vinculin                                                    | 0.0019292  | 0.033478  | 1.3843  | ↑ | 0.46919   | 0.18425   | 0.9198  | 0.86717 | ↓ | -0.20561    | 0.00022686  | 0.022308  | 0.64297 | ↓ | -0.63718  |
| E7END6     | Vitamin K-dependent protein C                               | 0.055287   | 0.25092   | 0.76741 | ↓ | -0.38192  | 0.033675  | 0.87729 | 1.395   | ↑ | 0.48031     | 0.58958     | 0.87223   | 1.1142  | ↑ | 0.15607   |
| A0A0S2Z4L3 | Vitamin K-dependent protein S (Fragment)                    | 0.65713    | 0.88072   | 0.96169 | ↓ | -0.056351 | 0.67475   | 0.9938  | 1.0333  | ↑ | 0.047289    | 0.59726     | 0.87223   | 1.039   | ↑ | 0.055176  |
| P22891     | Vitamin K-dependent protein Z                               | 0.025051   | 0.1478    | 0.73049 | ↓ | -0.45306  | 0.20532   | 0.9198  | 1.2146  | ↑ | 0.28049     | 0.37854     | 0.75965   | 1.1156  | ↑ | 0.15786   |

|        |                                                  |           |          |           |          |         |        |           |          |          |         |           |            |
|--------|--------------------------------------------------|-----------|----------|-----------|----------|---------|--------|-----------|----------|----------|---------|-----------|------------|
| Q7Z5L0 | Vitelline membrane outer layer protein 1 homolog | 0.028132  | 0.16272  | 0.5811 ↓  | -0.78313 | 0.16369 | 0.9198 | 1.3577 ↑  | 0.44114  | 0.22006  | 0.64747 | 2.0234 ↑  | 1.0168     |
| P04004 | Vitronectin                                      | 0.048772  | 0.23138  | 0.80302 ↓ | -0.31649 | 0.72747 | 0.9938 | 1.0572 ↑  | 0.080226 | 0.022275 | 0.34584 | 1.2769 ↑  | 0.35267    |
| P04275 | von Willebrand factor                            | 0.0007431 | 0.018268 | 1.1983 ↑  | 0.26094  | 0.68891 | 0.9938 | 1.0368 ↑  | 0.052088 | 0.21717  | 0.64747 | 0.92717 ↓ | -0.1091    |
| O75083 | WD repeat-containing protein 1                   | 0.11919   | 0.36057  | 1.4189 ↑  | 0.50476  | 0.9152  | 0.9938 | 0.94105 ↓ | -0.08765 | 0.20221  | 0.64747 | 0.7281 ↓  | -0.4578    |
| P25311 | Zinc-alpha-2-glycoprotein                        | 0.35091   | 0.65518  | 0.91603 ↓ | -0.12653 | 0.54036 | 0.9938 | 1.0446 ↑  | 0.062915 | 0.85539  | 0.96402 | 0.99812 ↓ | -0.0027136 |



Supplementary Table 7. Comparison of the effects of radiation at 36 h post-irradiation.

| UniProtKB  | ProteinNames                                                      | 36 Hour vs. Pre |           |         |          | 36 Hour ExRad I vs. Vehicle |           |         |          | 36 Hour ExRad II vs. Vehicle |           |           |          |         |   |           |
|------------|-------------------------------------------------------------------|-----------------|-----------|---------|----------|-----------------------------|-----------|---------|----------|------------------------------|-----------|-----------|----------|---------|---|-----------|
|            |                                                                   | p-value         | FDR       | FC      | Log2(FC) | p-value                     | FDR       | FC      | Log2(FC) | p-value                      | FDR       | FC        | Log2(FC) |         |   |           |
| P62258     | 14-3-3 protein epsilon                                            | 0.18138         | 0.42088   | 1.158   | ↑        | 0.21159                     | 0.98492   | 0.99461 | 0.98544  | ↓                            | -0.02116  | 0.22752   | 0.73744  | 1.1301  | ↑ | 0.17649   |
| P61981     | 14-3-3 protein gamma                                              | 0.0055575       | 0.074521  | 2.821   | ↑        | 1.4962                      | 0.41895   | 0.8226  | 1.2281   | ↑                            | 0.29641   | 0.23624   | 0.73744  | 0.67827 | ↓ | -0.56006  |
| P63104     | 14-3-3 protein zeta/delta                                         | 0.071592        | 0.26015   | 1.4775  | ↑        | 0.56311                     | 0.52105   | 0.8371  | 1.2902   | ↑                            | 0.36754   | 0.67784   | 0.91373  | 0.87619 | ↓ | -0.19069  |
| A0A2R8Y6G6 | 2-phospho-D-glycerate hydro-lyase                                 | 0.014478        | 0.10861   | 1.2739  | ↑        | 0.34925                     | 0.47214   | 0.8371  | 0.95213  | ↓                            | -0.070765 | 0.36213   | 0.78262  | 1.0233  | ↑ | 0.033236  |
| P08253     | 72 kDa type IV collagenase                                        | 0.0046098       | 0.067995  | 1.3338  | ↑        | 0.41551                     | 0.28777   | 0.8226  | 0.88787  | ↓                            | -0.17158  | 0.39836   | 0.78262  | 0.91207 | ↓ | -0.13279  |
| A0A7P0TAI0 | 78 kDa glucose-regulated protein                                  | 0.087912        | 0.29471   | 1.3755  | ↑        | 0.45991                     | 0.49668   | 0.8371  | 0.86471  | ↓                            | -0.20972  | 0.76386   | 0.95577  | 0.93324 | ↓ | -0.099682 |
| Q76LX8     | A disintegrin and metalloproteinase with thrombospondin motifs 13 | 0.68839         | 0.83916   | 1.0912  | ↓        | 0.12593                     | 0.65017   | 0.87487 | 0.89418  | ↓                            | -0.16136  | 0.056022  | 0.53501  | 1.3434  | ↑ | 0.42585   |
| Q92484     | Acid sphingomyelinase-like phosphodiesterase 3a                   | 0.35698         | 0.60902   | 0.86814 | ↓        | -0.204                      | 0.21478   | 0.76886 | 1.2847   | ↑                            | 0.36146   | 0.086364  | 0.53501  | 1.6203  | ↑ | 0.69625   |
| P68032     | Actin, alpha cardiac muscle 1                                     | 0.053462        | 0.21377   | 4.8131  | ↑        | 2.267                       | 0.63846   | 0.87487 | 1.2237   | ↑                            | 0.29129   | 0.77025   | 0.95577  | 1.3899  | ↑ | 0.475     |
| P60709     | Actin, cytoplasmic 1                                              | 0.007797        | 0.082147  | 4.5855  | ↑        | 2.1971                      | 0.38545   | 0.8226  | 1.0651   | ↑                            | 0.090957  | 0.21725   | 0.73254  | 2.1309  | ↑ | 1.0915    |
| I3L4N8     | Actin, cytoplasmic 2                                              | 0.0035973       | 0.062423  | 2.7743  | ↑        | 1.4721                      | 0.96879   | 0.99461 | 0.92021  | ↓                            | -0.11997  | 0.40019   | 0.78262  | 1.1722  | ↑ | 0.22927   |
| Q15848     | Adiponectin                                                       | 0.81458         | 0.90829   | 0.96284 | ↓        | -0.054633                   | 0.20173   | 0.76466 | 1.4313   | ↑                            | 0.51729   | 0.84313   | 0.96875  | 1.1822  | ↑ | 0.24142   |
| K7ERG9     | Adipsin                                                           | 0.28395         | 0.56983   | 1.0774  | ↑        | 0.10749                     | 0.27869   | 0.82213 | 1.1165   | ↑                            | 0.15902   | 0.89298   | 0.98204  | 1.0138  | ↑ | 0.019775  |
| P43652     | Afamin                                                            | 0.55889         | 0.74603   | 1.0575  | ↓        | 0.080592                    | 0.37042   | 0.8226  | 0.91558  | ↓                            | -0.12724  | 0.11016   | 0.53501  | 0.85237 | ↓ | -0.23045  |
| A0A0C4DGB6 | Albumin                                                           | 0.026487        | 0.15026   | 0.66646 | ↓        | -0.58541                    | 0.11401   | 0.76466 | 0.72549  | ↓                            | -0.46298  | 0.82768   | 0.98065  | 1.0994  | ↑ | 0.13678   |
| P02763     | Alpha-1-acid glycoprotein 1                                       | 0.00099497      | 0.026683  | 7.33    | ↑        | 2.8738                      | 0.39624   | 0.8226  | 0.62992  | ↓                            | -0.66676  | 0.097399  | 0.53501  | 0.46778 | ↓ | -1.0961   |
| P01011     | Alpha-1-antichymotrypsin                                          | 0.000040849     | 0.0024101 | 5.9477  | ↑        | 2.5723                      | 0.22936   | 0.76886 | 0.68022  | ↓                            | -0.55592  | 0.32961   | 0.78262  | 0.81744 | ↓ | -0.29082  |
| A0A024R6I7 | Alpha-1-antitrypsin                                               | 0.02607         | 0.15026   | 2.2249  | ↑        | 1.1537                      | 0.031101  | 0.76466 | 0.43913  | ↓                            | -1.1873   | 0.070687  | 0.53501  | 0.50721 | ↓ | -0.97934  |
| P04217     | Alpha-1B-glycoprotein                                             | 0.092801        | 0.29784   | 0.86246 | ↓        | -0.21348                    | 0.73116   | 0.90758 | 0.9823   | ↓                            | -0.025769 | 0.95349   | 0.98204  | 1.0082  | ↑ | 0.011761  |
| P08697     | Alpha-2-antiplasmin                                               | 0.88543         | 0.94844   | 1.0057  | ↑        | 0.0081896                   | 0.75075   | 0.90775 | 1.0188   | ↑                            | 0.026889  | 0.38577   | 0.78262  | 0.9043  | ↓ | -0.14513  |
| C9JV77     | Alpha-2-HS-glycoprotein                                           | 0.2813          | 0.56983   | 0.81477 | ↓        | -0.29554                    | 0.0086688 | 0.42621 | 0.58775  | ↓                            | -0.76674  | 0.054083  | 0.53501  | 0.6903  | ↓ | -0.53471  |
| P01023     | Alpha-2-macroglobulin                                             | 0.95861         | 0.99294   | 0.99827 | ↓        | -0.0024962                  | 0.43154   | 0.8226  | 0.95685  | ↓                            | -0.063642 | 0.42756   | 0.78262  | 0.9537  | ↓ | -0.068387 |
| A0A7I2V4Y4 | Alpha-actinin-1                                                   | 0.82516         | 0.90829   | 0.98033 | ↓        | -0.028659                   | 0.1407    | 0.76466 | 1.2886   | ↑                            | 0.36576   | 0.071689  | 0.53501  | 1.3971  | ↑ | 0.48242   |
| A0A0C4DGL1 | Alpha-mannosidase 2x                                              | 0.93672         | 0.97294   | 0.95151 | ↓        | -0.071708                   | 0.7202    | 0.90025 | 0.93041  | ↓                            | -0.10406  | 0.77531   | 0.95577  | 0.94349 | ↓ | -0.083917 |
| P54802     | Alpha-N-acetylglucosaminidase                                     | 0.046215        | 0.20049   | 0.84713 | ↓        | -0.23935                    | 0.2843    | 0.82223 | 1.1313   | ↑                            | 0.17803   | 0.42514   | 0.78262  | 0.92811 | ↓ | -0.10764  |
| A0A7P0T8D1 | Angiotensin 1-10                                                  | 0.0087823       | 0.08636   | 1.319   | ↑        | 0.39939                     | 0.49086   | 0.8371  | 0.92644  | ↓                            | -0.11024  | 0.012094  | 0.50968  | 0.73572 | ↓ | -0.44277  |
| A0A0A0MSN4 | Angiotensin-converting enzyme                                     | 0.41982         | 0.65528   | 1.1045  | ↑        | 0.14335                     | 0.3956    | 0.8226  | 0.86314  | ↓                            | -0.21233  | 0.11528   | 0.54852  | 0.76797 | ↓ | -0.38089  |
| P04083     | Annexin A1                                                        | 0.47712         | 0.70375   | 0.8365  | ↓        | -0.25757                    | 0.6818    | 0.88996 | 1.1039   | ↑                            | 0.1426    | 0.34461   | 0.78262  | 1.1768  | ↑ | 0.23481   |
| P01008     | Antithrombin-III                                                  | 0.21137         | 0.45848   | 0.89575 | ↓        | -0.15884                    | 0.17935   | 0.76466 | 0.86734  | ↓                            | -0.20533  | 0.093287  | 0.53501  | 0.83278 | ↓ | -0.26399  |
| F8W696     | Apolipoprotein A-I                                                | 0.33503         | 0.59586   | 0.92219 | ↓        | -0.11686                    | 0.40994   | 0.8226  | 0.93658  | ↓                            | -0.094524 | 0.72519   | 0.93829  | 1.0733  | ↑ | 0.10208   |
| P06727     | Apolipoprotein A-IV                                               | 0.52382         | 0.7324    | 1.0521  | ↑        | 0.073268                    | 0.86176   | 0.95571 | 1.0234   | ↑                            | 0.033413  | 0.66735   | 0.91373  | 0.96075 | ↓ | -0.057766 |
| P04114     | Apolipoprotein B-100                                              | 0.31511         | 0.59294   | 1.052   | ↑        | 0.073194                    | 0.099372  | 0.76466 | 1.2382   | ↑                            | 0.30823   | 0.67092   | 0.91373  | 0.97337 | ↓ | -0.038946 |
| K7ER74     | Apolipoprotein C-II                                               | 0.82458         | 0.90829   | 0.96024 | ↓        | -0.058537                   | 0.69781   | 0.89584 | 1.1432   | ↑                            | 0.19306   | 0.42377   | 0.78262  | 1.1734  | ↑ | 0.23065   |
| B0Y1W2     | Apolipoprotein C-III                                              | 0.098945        | 0.29784   | 0.70618 | ↓        | -0.50188                    | 0.51034   | 0.8371  | 1.2235   | ↑                            | 0.29107   | 0.68278   | 0.91373  | 1.223   | ↓ | 0.29047   |
| P02649     | Apolipoprotein E                                                  | 0.0013473       | 0.033121  | 1.2821  | ↑        | 0.35854                     | 0.89798   | 0.97035 | 1.0078   | ↑                            | 0.011238  | 0.11063   | 0.53501  | 0.8675  | ↓ | -0.20506  |
| P08519     | Apolipoprotein(a)                                                 | 0.4084          | 0.64773   | 1.0311  | ↑        | 0.04423                     | 0.4346    | 0.8226  | 0.92412  | ↓                            | -0.11384  | 0.15932   | 0.60146  | 0.85623 | ↓ | -0.22392  |
| O75882     | Attractin                                                         | 0.77601         | 0.8873    | 1.0268  | ↑        | 0.038123                    | 0.76527   | 0.90775 | 1.0326   | ↑                            | 0.046306  | 0.85869   | 0.97428  | 0.98231 | ↓ | -0.025752 |
| P02749     | Beta-2-glycoprotein 1                                             | 0.10274         | 0.30008   | 0.92083 | ↓        | -0.119                      | 0.20011   | 0.76466 | 1.0735   | ↑                            | 0.1023    | 0.60658   | 0.86892  | 1.038   | ↑ | 0.053835  |
| J3KRP0     | Beta-Ala-His dipeptidase                                          | 0.28387         | 0.56983   | 1.1753  | ↑        | 0.23308                     | 0.074474  | 0.76466 | 0.72436  | ↓                            | -0.46522  | 0.10898   | 0.53501  | 0.74579 | ↓ | -0.42317  |
| P43251     | Biotinidase                                                       | 0.51099         | 0.72822   | 1.1265  | ↑        | 0.17184                     | 0.37591   | 0.8226  | 0.82439  | ↓                            | -0.27859  | 0.31504   | 0.78262  | 0.80059 | ↓ | -0.32086  |
| J3KSD8     | Bleomycin hydrolase (Fragment)                                    | 0.35922         | 0.60902   | 0.24355 | ↓        | -2.0377                     | 0.7481    | 0.90775 | 0.79516  | ↓                            | -0.33069  | 0.85787   | 0.97428  | 0.87047 | ↓ | -0.20014  |
| Q9UBW5     | Bridging integrator 2                                             | 0.077257        | 0.27132   | 3.5377  | ↑        | 1.8228                      | 0.48267   | 0.8371  | 0.4858   | ↓                            | -1.0416   | 0.84574   | 0.96875  | 1.1215  | ↑ | 0.1654    |
| B4E1Z4     | C3/C5 convertase                                                  | 0.003886        | 0.063687  | 1.1036  | ↑        | 0.14227                     | 0.02034   | 0.6667  | 0.90664  | ↓                            | -0.14139  | 0.078319  | 0.53501  | 0.90151 | ↓ | -0.14958  |
| P04003     | C4b-binding protein alpha chain                                   | 0.33922         | 0.59586   | 1.086   | ↑        | 0.11901                     | 0.70452   | 0.89584 | 0.92639  | ↓                            | -0.11031  | 0.3183    | 0.78262  | 0.85269 | ↓ | -0.22991  |
| P20851     | C4b-binding protein beta chain                                    | 0.00451         | 0.067995  | 0.69272 | ↓        | -0.52965                    | 0.15604   | 0.76466 | 1.3389   | ↑                            | 0.42108   | 0.0064816 | 0.31868  | 1.5431  | ↑ | 0.62579   |
| H3BNC6     | Cadherin-1                                                        | 0.17507         | 0.41631   | 1.2739  | ↑        | 0.34923                     | 0.90751   | 0.97706 | 1.0723   | ↑                            | 0.10073   | 0.10073   | 0.78262  | 0.85202 | ↓ | -0.23103  |
| P55290     | Cadherin-13                                                       | 0.30021         | 0.58264   | 1.2221  | ↑        | 0.28933                     | 0.59711   | 0.86564 | 0.88643  | ↓                            | -0.17392  | 0.52044   | 0.8344   | 0.8462  | ↓ | -0.24092  |
| P33151     | Cadherin-5                                                        | 0.12324         | 0.33978   | 1.4743  | ↑        | 0.56006                     | 0.18715   | 0.76466 | 0.69638  | ↓                            | -0.52206  | 0.046383  | 0.53501  | 0.57487 | ↓ | -0.79869  |
| Q9NZT1     | Calmodulin-like protein 5                                         | 0.33054         | 0.59586   | 0.36117 | ↓        | -1.4693                     | 0.18909   | 0.76466 | 2.6798   | ↑                            | 1.4221    | 0.39692   | 0.78262  | 4.4928  | ↑ | 2.1676    |
| E5RFL2     | Carbonate dehydratase I (Fragment)                                | 0.40684         | 0.64773   | 1.4753  | ↑        | 0.56096                     | 0.98975   | 0.99461 | 1.0531   | ↑                            | 0.07468   | 0.95782   | 0.98204  | 1.0334  | ↑ | 0.047386  |
| P00918     | Carbonic anhydrase 2                                              | 0.053623        | 0.21377   | 1.3094  | ↑        | 0.38893                     | 0.32799   | 0.8226  | 0.84425  | ↓                            | -0.24426  | 0.21852   | 0.73254  | 0.81824 | ↓ | -0.28941  |
| A0A087WSY5 | Carboxypeptidase B2                                               | 0.13644         | 0.36261   | 1.0912  | ↓        | 0.12596                     | 0.12836   | 0.76466 | 0.86512  | ↓                            | -0.20904  | 0.037288  | 0.53501  | 0.81387 | ↓ | -0.29714  |
| P15169     | Carboxypeptidase N catalytic chain                                | 0.35856         | 0.60902   | 0.92175 | ↓        | -0.11755                    | 0.61756   | 0.86581 | 1.0359   | ↑                            | 0.050954  | 0.60892   | 0.86892  | 1.0459  | ↑ | 0.064756  |
| P22792     | Carboxypeptidase N subunit 2                                      | 0.77115         | 0.88517   | 1.0682  | ↑        | 0.095148                    | 0.69405   | 0.89584 | 0.88614  | ↓                            | -0.1744   | 0.69072   | 0.91373  | 0.91327 | ↓ | -0.13088  |

|            |                                                         |             |           |          |   |            |           |         |         |   |           |            |         |          |   |           |
|------------|---------------------------------------------------------|-------------|-----------|----------|---|------------|-----------|---------|---------|---|-----------|------------|---------|----------|---|-----------|
| E5RH35     | Carboxypeptidase Q (Fragment)                           | 0.20557     | 0.45256   | 1.1353   | ↑ | 0.18302    | 0.50129   | 0.8371  | 0.95471 | ↓ | -0.066865 | 0.019124   | 0.53501 | 0.50852  | ↓ | -0.97563  |
| A0A0C4DFP6 | Cartilage acidic protein 1                              | 0.59319     | 0.77774   | 1.0531   | ↑ | 0.074658   | 0.55006   | 0.8371  | 0.93448 | ↓ | -0.097767 | 0.95948    | 0.98204 | 1.0057   | ↑ | 0.0082507 |
| G3XAP6     | Cartilage oligomeric matrix protein                     | 0.30001     | 0.58264   | 0.86628  | ↓ | -0.2071    | 0.44636   | 0.83034 | 1.1874  | ↑ | 0.24781   | 0.39124    | 0.78262 | 1.1105   | ↑ | 0.15125   |
| P04040     | Catalase                                                | 0.10013     | 0.29835   | 1.119    | ↓ | 0.16217    | 0.13151   | 0.76466 | 0.85999 | ↓ | -0.2176   | 0.0052627  | 0.3105  | 0.78575  | ↓ | -0.34786  |
| A0A7P0T816 | Cathepsin X                                             | 0.56474     | 0.74707   | 0.79998  | ↓ | -0.32197   | 0.15975   | 0.76466 | 0.68535 | ↓ | -0.5451   | 0.92642    | 0.98204 | 0.98295  | ↓ | -0.024807 |
| P11717     | Cation-independent mannose-6-phosphate receptor         | 0.14097     | 0.36427   | 1.1172   | ↑ | 0.15994    | 0.53052   | 0.8371  | 0.94509 | ↓ | -0.081482 | 0.044338   | 0.53501 | 0.83924  | ↓ | -0.25285  |
| Q6YHK3     | CD109 antigen                                           | 0.034047    | 0.17276   | 0.85241  | ↓ | -0.23038   | 0.13598   | 0.76466 | 1.1696  | ↑ | 0.22602   | 0.023656   | 0.53501 | 1.2233   | ↑ | 0.29083   |
| H0Y2P0     | CD44 antigen (Fragment)                                 | 0.2775      | 0.56983   | 1.533    | ↓ | 0.61632    | 0.76686   | 0.90775 | 0.79157 | ↓ | -0.3372   | 0.91667    | 0.98204 | 0.94122  | ↓ | -0.08739  |
| O43866     | CD5 antigen-like                                        | 0.46973     | 0.69633   | 1.2028   | ↑ | 0.26641    | 0.85988   | 0.95571 | 1.0379  | ↑ | 0.053721  | 0.23763    | 0.73744 | 0.62637  | ↓ | -0.67491  |
| P00450     | Ceruloplasmin                                           | 0.48826     | 0.71305   | 1.0342   | ↓ | 0.048567   | 0.16753   | 0.76466 | 1.0815  | ↑ | 0.11306   | 0.89699    | 0.98204 | 1.0048   | ↑ | 0.0069118 |
| P36222     | Chitinase-3-like protein 1                              | 0.28303     | 0.56983   | 0.8577   | ↓ | -0.22145   | 0.26139   | 0.79496 | 1.1745  | ↑ | 0.23207   | 0.45055    | 0.78762 | 0.92409  | ↓ | -0.1139   |
| O00299     | Chloride intracellular channel protein 1                | 0.39422     | 0.64568   | 1.4444   | ↑ | 0.53044    | 0.11286   | 0.76466 | 2.157   | ↑ | 1.109     | 0.35302    | 0.78262 | 1.7386   | ↑ | 0.79792   |
| H3BRJ9     | Cholesteryl ester transfer protein                      | 0.87544     | 0.94397   | 0.44319  | ↓ | -1.174     | 0.10849   | 0.76466 | 0.75711 | ↓ | -0.40143  | 0.040252   | 0.53501 | 0.65199  | ↓ | -0.61708  |
| P06276     | Cholinesterase                                          | 0.48101     | 0.70596   | 1.1245   | ↑ | 0.16935    | 0.26601   | 0.79849 | 0.75127 | ↓ | -0.41259  | 0.44057    | 0.78262 | 0.82519  | ↓ | -0.27721  |
| P08217     | Chymotrypsin-like elastase family member 2A             | 0.091665    | 0.29784   | 2.3178   | ↑ | 1.2127     | 0.96062   | 0.99461 | 0.93093 | ↓ | -0.10326  | 0.35106    | 0.78262 | 0.95743  | ↓ | -0.74317  |
| P08861     | Chymotrypsin-like elastase family member 3B             | 0.037463    | 0.17825   | 2.3404   | ↑ | 1.2267     | 0.99461   | 0.99461 | 1.5023  | ↑ | 0.58714   | 0.35431    | 0.78262 | 1.0473   | ↑ | 0.066648  |
| P10909     | Clusterin                                               | 0.097741    | 0.29784   | 0.87154  | ↓ | -0.19837   | 0.82169   | 0.93953 | 1.0248  | ↑ | 0.035296  | 0.68768    | 0.91373 | 1.0564   | ↑ | 0.079207  |
| Q14019     | Coactosin-like protein                                  | 0.039523    | 0.18507   | 1.6586   | ↑ | 0.72995    | 0.88821   | 0.96424 | 0.98021 | ↓ | -0.028843 | 0.81056    | 0.96411 | 1.0861   | ↑ | 0.11912   |
| P00740     | Coagulation factor IX                                   | 0.9159      | 0.96798   | 1.0064   | ↑ | 0.0091801  | 0.5825    | 0.85691 | 1.0481  | ↑ | 0.06775   | 0.55478    | 0.84383 | 1.0565   | ↑ | 0.079285  |
| A0A0A0MRJ7 | Coagulation factor V                                    | 0.60521     | 0.78418   | 1.0321   | ↑ | 0.045628   | 0.2417    | 0.77351 | 1.0642  | ↑ | 0.089752  | 0.10621    | 0.53501 | 1.1403   | ↑ | 0.1894    |
| F5H8B0     | Coagulation factor VII                                  | 0.29281     | 0.57972   | 1.186    | ↑ | 0.24605    | 0.9701    | 0.99461 | 1.014   | ↑ | 0.020018  | 0.47869    | 0.80234 | 0.88612  | ↓ | -0.17442  |
| P00742     | Coagulation factor X                                    | 0.32337     | 0.59586   | 0.93657  | ↓ | -0.094535  | 0.35566   | 0.8226  | 0.93393 | ↓ | -0.098619 | 0.13932    | 0.58713 | 0.89861  | ↓ | -0.15423  |
| P03951     | Coagulation factor XI                                   | 0.015154    | 0.10903   | 1.2365   | ↑ | 0.30631    | 0.11597   | 0.76466 | 0.84309 | ↓ | -0.24623  | 0.021172   | 0.53501 | 0.73463  | ↓ | -0.44491  |
| P00748     | Coagulation factor XII                                  | 0.20249     | 0.44914   | 0.88993  | ↓ | -0.16824   | 0.7101    | 0.89836 | 1.0231  | ↑ | 0.032889  | 0.88417    | 0.98065 | 1.0035   | ↑ | 0.0051065 |
| P00488     | Coagulation factor XIII A chain                         | 0.25738     | 0.54625   | 1.1763   | ↑ | 0.23428    | 0.46531   | 0.8371  | 0.88038 | ↓ | -0.1838   | 0.27521    | 0.76591 | 0.82494  | ↓ | -0.27764  |
| P05160     | Coagulation factor XIII B chain                         | 0.80597     | 0.90525   | 1.0249   | ↑ | 0.035545   | 0.56943   | 0.84839 | 1.0467  | ↑ | 0.065801  | 0.72156    | 0.9377  | 0.95889  | ↓ | -0.060568 |
| O00748     | Cocaine esterase                                        | 0.55147     | 0.74494   | 2.8036   | ↑ | 1.4873     | 0.52593   | 0.8371  | 0.12535 | ↓ | -2.996    | 0.28583    | 0.76882 | 0.028826 | ↓ | -5.1165   |
| E9PP50     | Cofilin, non-muscle isoform (Fragment)                  | 0.010523    | 0.094065  | 4.2072   | ↓ | 2.0729     | 0.042949  | 0.76466 | 0.31265 | ↓ | -1.6774   | 0.038697   | 0.53501 | 0.3041   | ↓ | -1.7174   |
| P02452     | Collagen alpha-1(I) chain                               | 0.8875      | 0.94844   | 0.94744  | ↓ | -0.077893  | 0.61927   | 0.86581 | 1.4197  | ↑ | 0.5056    | 0.42638    | 0.78262 | 1.2894   | ↑ | 0.36675   |
| P02745     | Complement C1q subcomponent subunit A                   | 0.034552    | 0.17276   | 0.76511  | ↓ | -0.38626   | 0.40006   | 0.8226  | 1.2767  | ↑ | 0.35237   | 0.0037101  | 0.27362 | 1.5156   | ↑ | 0.59989   |
| A0A0A0MSV6 | Complement C1q subcomponent subunit B (Fragment)        | 0.33934     | 0.59586   | 1.2627   | ↓ | 0.33649    | 0.21994   | 0.76886 | 1.2428  | ↑ | 0.31364   | 0.60308    | 0.86892 | 0.84073  | ↓ | -0.25208  |
| P02747     | Complement C1q subcomponent subunit C                   | 0.93988     | 0.97294   | 0.70947  | ↓ | -0.49519   | 0.0083995 | 0.42621 | 1.8722  | ↑ | 0.90471   | 0.064828   | 0.53501 | 1.5796   | ↑ | 0.65954   |
| H0YFL7     | Complement C1r subcomponent-like protein (Fragment)     | 0.84158     | 0.91611   | 1.1183   | ↑ | 0.16126    | 0.69439   | 0.89584 | 0.72837 | ↓ | -0.45726  | 0.91161    | 0.98204 | 1.059    | ↑ | 0.082674  |
| A0A087X232 | Complement C1s subcomponent                             | 0.76899     | 0.88517   | 1.0084   | ↑ | 0.012065   | 0.53587   | 0.8371  | 1.172   | ↑ | 0.22899   | 0.83066    | 0.96856 | 0.98648  | ↓ | -0.019632 |
| P06681     | Complement C2                                           | 0.95974     | 0.97294   | 0.96895  | ↓ | -0.0455    | 0.014262  | 0.55131 | 1.3309  | ↑ | 0.41237   | 0.4039     | 0.78262 | 1.0948   | ↑ | 0.13061   |
| P01024     | Complement C3                                           | 0.50959     | 0.72822   | 1.0255   | ↓ | 0.036277   | 0.51823   | 0.8371  | 1.048   | ↑ | 0.067624  | 0.41285    | 0.78262 | 0.94636  | ↓ | -0.079545 |
| P0C0L4     | Complement C4-A                                         | 0.31556     | 0.59294   | 1.0606   | ↑ | 0.084934   | 0.4038    | 0.8226  | 1.0819  | ↑ | 0.11359   | 0.56763    | 0.84383 | 0.95785  | ↓ | -0.062133 |
| P0C0L5     | Complement C4-B                                         | 0.14742     | 0.36856   | 2.1368   | ↑ | 1.0955     | 0.073372  | 0.76466 | 0.31411 | ↓ | -1.6706   | 0.10825    | 0.53501 | 0.35676  | ↓ | -1.487    |
| P01031     | Complement C5                                           | 0.082694    | 0.287     | 1.1167   | ↑ | 0.15924    | 0.61528   | 0.86581 | 0.96367 | ↓ | -0.053383 | 0.12573    | 0.57067 | 0.877    | ↓ | -0.18935  |
| F5GY80     | Complement component 8 subunit beta                     | 0.46066     | 0.69333   | 1.0947   | ↑ | 0.13058    | 0.48017   | 0.8371  | 0.90828 | ↓ | -0.13878  | 0.22779    | 0.73744 | 0.85595  | ↓ | -0.2244   |
| P13671     | Complement component C6                                 | 0.18567     | 0.42134   | 1.0729   | ↓ | 0.10155    | 0.23661   | 0.77351 | 1.1053  | ↑ | 0.14446   | 0.0024789  | 0.27362 | 0.7987   | ↓ | -0.32427  |
| P10643     | Complement component C7                                 | 0.76891     | 0.88517   | 0.97648  | ↓ | -0.03434   | 0.0043232 | 0.42621 | 1.2037  | ↑ | 0.26742   | 0.52899    | 0.84313 | 1.0361   | ↑ | 0.05114   |
| P07357     | Complement component C8 alpha chain                     | 0.54315     | 0.74181   | 0.95341  | ↓ | -0.068827  | 0.58386   | 0.85691 | 1.0305  | ↑ | 0.043365  | 0.6906     | 0.91373 | 1.0318   | ↑ | 0.045117  |
| P07360     | Complement component C8 gamma chain                     | 0.065616    | 0.24502   | 0.8294   | ↓ | -0.26985   | 0.10019   | 0.76466 | 1.2067  | ↑ | 0.27106   | 0.5316     | 0.84313 | 1.0593   | ↑ | 0.083158  |
| P02748     | Complement component C9                                 | 0.000027602 | 0.0024101 | 1.3112   | ↓ | 0.39092    | 0.1092    | 0.76466 | 0.87985 | ↓ | -0.18468  | 0.00059429 | 0.17532 | 0.72857  | ↓ | -0.45687  |
| A0A0C4DGF5 | Complement component receptor 1-like protein (Fragment) | 0.1917      | 0.42843   | 0.67099  | ↓ | -0.57564   | 0.069825  | 0.76466 | 2.0045  | ↑ | 1.0032    | 0.29618    | 0.78262 | 3.59     | ↑ | 1.844     |
| P08603     | Complement factor H                                     | 0.56438     | 0.74707   | 1.0257   | ↑ | 0.036662   | 0.0036827 | 0.42621 | 1.2019  | ↑ | 0.26533   | 0.42112    | 0.78262 | 0.94961  | ↓ | -0.074589 |
| Q9BXR6     | Complement factor H-related protein 5                   | 0.11983     | 0.33348   | 1.2064   | ↑ | 0.27073    | 0.049048  | 0.76466 | 1.4334  | ↑ | 0.51942   | 0.50598    | 0.82968 | 1.1995   | ↑ | 0.26245   |
| E7ETH0     | Complement factor I                                     | 0.43214     | 0.66744   | 1.037    | ↑ | 0.052367   | 0.24361   | 0.77351 | 1.0836  | ↑ | 0.11585   | 0.28668    | 0.76882 | 0.90228  | ↓ | -0.14836  |
| E9PDY4     | Complement receptor type 1                              | 0.43873     | 0.67203   | 0.88848  | ↓ | -0.1706    | 0.085944  | 0.76466 | 1.3656  | ↑ | 0.44955   | 0.16355    | 0.60146 | 1.2692   | ↑ | 0.34392   |
| P20023     | Complement receptor type 2                              | 0.39616     | 0.64568   | 0.9172   | ↓ | -0.12469   | 0.3977    | 0.8226  | 0.90819 | ↓ | -0.13894  | 0.73165    | 0.94252 | 1.1759   | ↑ | 0.23376   |
| A0A3B3ISR2 | Complement subcomponent C1r                             | 0.46395     | 0.69474   | 1.0686   | ↑ | 0.095688   | 0.93428   | 0.99145 | 0.98668 | ↓ | -0.019347 | 0.61707    | 0.87517 | 1.0349   | ↑ | 0.049454  |
| B4E3S0     | Coronin                                                 | 0.99941     | 0.10369   | 0.052209 | ↓ | 0.76466    | 0.039517  | 0.76466 | 1.8185  | ↑ | 0.86277   | 0.36064    | 0.78262 | 1.577    | ↑ | 0.65715   |
| P31146     | Coronin-1A                                              | 0.79421     | 0.90112   | 0.9945   | ↓ | -0.0079626 | 0.25172   | 0.77351 | 1.2082  | ↑ | 0.27283   | 0.035419   | 0.53501 | 1.3597   | ↑ | 0.44324   |
| P08185     | Corticosteroid-binding globulin                         | 0.45056     | 0.68161   | 1.2393   | ↑ | 0.30958    | 0.48387   | 0.8371  | 0.6134  | ↓ | -0.70509  | 0.37883    | 0.78262 | 0.43241  | ↓ | -1.2095   |
| P02741     | C-reactive protein                                      | 0.000077357 | 0.0038034 | 3.1284   | ↑ | 1.6454     | 0.49753   | 0.8371  | 0.85183 | ↓ | -0.23136  | 0.081962   | 0.53501 | 0.64307  | ↓ | -0.63695  |
| P01034     | Cystatin-C                                              | 0.52756     | 0.7324    | 1.0684   | ↑ | 0.095511   | 0.84462   | 0.95571 | 1.1933  | ↑ | 0.25491   | 0.76329    | 0.95577 | 1.1174   | ↑ | 0.16011   |
| P32320     | Cytidine deaminase                                      | 0.6246      | 0.80112   | 0.91195  | ↓ | -0.13297   | 0.34435   | 0.8226  | 1.1973  | ↑ | 0.25975   | 0.47798    | 0.80234 | 1.3688   | ↑ | 0.45296   |
| P81605     | Dermcidin                                               | 0.32754     | 0.59586   | 3.4956   | ↑ | 1.8055     | 0.40104   | 0.8226  | 1.0643  | ↑ | 0.089889  | 0.55915    | 0.84383 | 0.30872  | ↓ | -1.6956   |

|            |                                                                  |             |            |         |   |           |          |         |          |   |            |           |         |          |   |           |
|------------|------------------------------------------------------------------|-------------|------------|---------|---|-----------|----------|---------|----------|---|------------|-----------|---------|----------|---|-----------|
| Q02413     | Desmoglein-1                                                     | 0.15647     | 0.37834    | 0.68134 | ↓ | -0.55356  | 0.037825 | 0.76466 | 1.8755   | ↑ | 0.90724    | 0.083209  | 0.53501 | 1.3844   | ↑ | 0.46926   |
| Q9UHL4     | Dipeptidyl peptidase 2                                           | 0.30361     | 0.58305    | 1.0157  | ↑ | 0.022418  | 0.14159  | 0.76466 | 0.8338   | ↓ | -0.26222   | 0.45121   | 0.78762 | 1.0056   | ↑ | 0.0080589 |
| E5RIA2     | Ectonucleotide pyrophosphatase/phosphodiesterase family member 2 | 0.41231     | 0.65043    | 1.0765  | ↓ | 0.10629   | 0.19275  | 0.76466 | 0.83819  | ↓ | -0.25466   | 0.42147   | 0.78262 | 0.90489  | ↓ | -0.14419  |
| Q12805     | EGF-containing fibulin-like extracellular matrix protein 1       | 0.66629     | 0.82935    | 0.76383 | ↓ | -0.38868  | 0.31819  | 0.8226  | 1.403    | ↑ | 0.48855    | 0.085908  | 0.53501 | 3.2627   | ↑ | 1.7061    |
| A0A0UIRQQ4 | Endothelial protein C receptor (Fragment)                        | 0.20828     | 0.45514    | 0.77154 | ↓ | -0.37418  | 0.86169  | 0.95571 | 0.97752  | ↓ | -0.032798  | 0.32001   | 0.78262 | 1.1285   | ↑ | 0.1744    |
| O75715     | Epididymal secretory glutathione peroxidase                      | 0.0048922   | 0.068723   | 1.7639  | ↑ | 0.81879   | 0.065442 | 0.76466 | 0.47937  | ↓ | -1.0608    | 0.31603   | 0.78262 | 1.0385   | ↑ | 0.054566  |
| Q9UBQ6     | Exostosin-like 2                                                 | 0.95652     | 0.97294    | 0.88081 | ↓ | -0.1831   | 0.5694   | 0.84839 | 1.1617   | ↑ | 0.21624    | 0.79046   | 0.95577 | 1.0446   | ↑ | 0.062934  |
| Q16610     | Extracellular matrix protein 1                                   | 0.0083157   | 0.084591   | 0.78448 | ↓ | -0.35018  | 0.059442 | 0.76466 | 1.1814   | ↑ | 0.24052    | 0.6301    | 0.88937 | 1.0628   | ↑ | 0.087819  |
| P08294     | Extracellular superoxide dismutase [Cu-Zn]                       | 0.69129     | 0.83922    | 1.0859  | ↑ | 0.11893   | 0.22515  | 0.76886 | 1.1977   | ↑ | 0.2603     | 0.82625   | 0.968   | 0.98123  | ↓ | -0.02733  |
| Q86UX7     | Fermitin family homolog 3                                        | 0.024454    | 0.15026    | 1.6125  | ↓ | 0.68932   | 0.75279  | 0.90775 | 0.93738  | ↓ | -0.093302  | 0.83633   | 0.96875 | 0.94314  | ↓ | -0.084458 |
| C9JC68     | Fetuin-B (Fragment)                                              | 0.40539     | 0.64773    | 0.77909 | ↓ | -0.36014  | 0.88906  | 0.96424 | 0.92437  | ↓ | -0.11346   | 0.94774   | 0.98204 | 0.8834   | ↓ | -0.17885  |
| P02671     | Fibrinogen alpha chain                                           | 0.0095734   | 0.088255   | 1.1567  | ↑ | 0.21005   | 0.98287  | 0.99461 | 1.0076   | ↑ | 0.010916   | 0.02181   | 0.53501 | 0.83334  | ↓ | -0.26302  |
| P02675     | Fibrinogen beta chain                                            | 0.15547     | 0.37834    | 2.3221  | ↑ | 1.2154    | 0.38504  | 0.8226  | 1.2407   | ↑ | 0.31111    | 0.66885   | 0.91373 | 0.66856  | ↓ | -0.58086  |
| C9JC84     | Fibrinogen gamma chain                                           | 0.073194    | 0.26015    | 2.3519  | ↑ | 1.2338    | 0.2129   | 0.76886 | 0.52193  | ↓ | -0.93808   | 0.16515   | 0.60146 | 0.49729  | ↓ | -1.0078   |
| P02751     | Fibronectin                                                      | 0.00052632  | 0.017252   | 0.61321 | ↓ | -0.70554  | 0.14652  | 0.76466 | 1.1164   | ↑ | 0.15886    | 0.7669    | 0.95577 | 1.0245   | ↑ | 0.034925  |
| H0Y4K8     | Fibronectin (Fragment)                                           | 0.74974     | 0.87804    | 0.91657 | ↓ | -0.12568  | 0.17732  | 0.76466 | 0.83752  | ↓ | -0.2558    | 0.0031936 | 0.27362 | 0.71045  | ↓ | -0.49319  |
| P23142     | Fibulin-1                                                        | 0.12485     | 0.34103    | 0.85607 | ↓ | -0.22421  | 0.20175  | 0.76466 | 1.1037   | ↑ | 0.14241    | 0.14168   | 0.58869 | 1.1707   | ↑ | 0.22733   |
| A0A087WVE2 | Ficolin-1                                                        | 0.49587     | 0.7206     | 0.55768 | ↓ | -0.84249  | 0.28413  | 0.82223 | 3.5144   | ↑ | 1.8133     | 0.56031   | 0.84383 | 1.7909   | ↑ | 0.84066   |
| Q15485     | Ficolin-2                                                        | 0.23708     | 0.50681    | 1.2824  | ↑ | 0.35884   | 0.96466  | 0.99461 | 1.1688   | ↑ | 0.22498    | 0.32868   | 0.78262 | 0.78273  | ↓ | -0.35341  |
| O75636     | Ficolin-3                                                        | 0.44764     | 0.68069    | 1.3344  | ↑ | 0.41616   | 0.092147 | 0.76466 | 0.40422  | ↓ | -1.3068    | 0.42413   | 0.78262 | 0.74699  | ↓ | -0.42084  |
| P21333     | Filamin-A                                                        | 0.019627    | 0.12867    | 1.5051  | ↑ | 0.58987   | 0.22407  | 0.76886 | 1.3148   | ↑ | 0.39486    | 0.51075   | 0.83077 | 1.1319   | ↑ | 0.1788    |
| P04075     | Fructose-bisphosphate aldolase A                                 | 0.02602     | 0.15026    | 1.5827  | ↑ | 0.66242   | 0.6768   | 0.88996 | 1.2774   | ↑ | 0.35322    | 0.51297   | 0.83077 | 0.84924  | ↓ | -0.23576  |
| P09972     | Fructose-bisphosphate aldolase C                                 | 0.072893    | 0.26015    | 2.2975  | ↑ | 1.2001    | 0.54648  | 0.8371  | 1.7489   | ↑ | 0.80646    | 0.93206   | 0.98204 | 1.1511   | ↑ | 0.20297   |
| Q08380     | Galectin-3-binding protein                                       | 0.001616    | 0.036671   | 0.78434 | ↓ | -0.35045  | 0.11515  | 0.76466 | 1.2058   | ↑ | 0.27003    | 0.28373   | 0.76882 | 1.1204   | ↑ | 0.16398   |
| D6RF35     | Gc-globulin                                                      | 0.53228     | 0.73355    | 0.97099 | ↓ | -0.042467 | 0.15736  | 0.76466 | 0.92283  | ↓ | -0.11586   | 0.12961   | 0.57067 | 0.93252  | ↓ | -0.10079  |
| P06396     | Gelsolin                                                         | 0.69619     | 0.84171    | 1.0097  | ↑ | 0.013943  | 0.10365  | 0.76466 | 0.90484  | ↓ | -0.14427   | 0.050615  | 0.53501 | 0.89453  | ↓ | -0.1608   |
| MOQX47     | Glia maturation factor gamma                                     | 0.11793     | 0.33348    | 1.407   | ↑ | 0.49259   | 0.93432  | 0.99145 | 1.1497   | ↑ | 0.20122    | 0.19944   | 0.68625 | 0.7305   | ↓ | -0.45303  |
| A0A2R8Y7X9 | GLOBIN domain-containing protein                                 | 0.0066725   | 0.078735   | 4.3582  | ↑ | 2.1237    | 0.35219  | 0.8226  | 0.46917  | ↓ | -1.0918    | 0.094905  | 0.53501 | 0.54079  | ↓ | -0.88686  |
| A0A0J9YXP8 | Glucose-6-phosphate isomerase (Fragment)                         | 0.37692     | 0.37692    | 1.4722  | ↑ | 0.55795   | 0.31225  | 0.8226  | 1.6425   | ↑ | 0.71592    | 0.96539   | 0.98204 | 0.97261  | ↓ | -0.040067 |
| A0A087X1J7 | Glutathione peroxidase                                           | 0.00003319  | 0.0024101  | 2.5597  | ↑ | 1.356     | 0.5421   | 0.8371  | 0.94567  | ↓ | -0.080596  | 0.080366  | 0.53501 | 0.62599  | ↓ | -0.67578  |
| P09211     | Glutathione S-transferase P                                      | 0.019484    | 0.12867    | 3.054   | ↑ | 1.6107    | 0.83572  | 0.95188 | 1.0511   | ↑ | 0.071917   | 0.95338   | 0.98204 | 0.92433  | ↓ | -0.11352  |
| E7EUT5     | Glyceraldehyde-3-phosphate dehydrogenase                         | 0.0035601   | 0.062423   | 2.4597  | ↑ | 1.2985    | 0.77909  | 0.90775 | 1.1641   | ↑ | 0.21925    | 0.29976   | 0.78262 | 3.0567   | ↑ | 1.612     |
| A0A0C4DGZ8 | Glycoprotein Ib (Platelet), alpha polypeptide                    | 0.16048     | 0.38488    | 1.7183  | ↑ | 0.78101   | 0.62553  | 0.86635 | 0.83011  | ↓ | -0.26863   | 0.32942   | 0.78262 | 0.65935  | ↓ | -0.60089  |
| P00738     | Haptoglobin                                                      | 4.611E-09   | 1.3602E-06 | 2.8698  | ↑ | 1.521     | 0.79487  | 0.91596 | 1.0608   | ↑ | 0.085207   | 0.067497  | 0.53501 | 0.73589  | ↓ | -0.44244  |
| P00739     | Haptoglobin-related protein                                      | 0.15373     | 0.37791    | 118.07  | ↑ | 6.8835    | 0.20218  | 0.76466 | 0.010314 | ↓ | -6.5992    | 0.36198   | 0.78262 | 0.070378 | ↓ | -3.8287   |
| G3V1N2     | HCG1745306, isoform CRA_a                                        | 0.29109     | 0.57972    | 1.6913  | ↑ | 1.6913    | 0.50728  | 0.8371  | 0.33431  | ↓ | -1.5808    | 0.24734   | 0.73744 | 0.22302  | ↓ | -2.1648   |
| E9PKE3     | Heat shock cognate 71 kDa protein                                | 0.016516    | 0.11601    | 1.4732  | ↑ | 0.55895   | 0.94652  | 0.99461 | 1.0719   | ↑ | 0.10013    | 0.32028   | 0.78262 | 1.2101   | ↑ | 0.27513   |
| P69905     | Hemoglobin subunit alpha                                         | 0.042883    | 0.19167    | 1.499   | ↑ | 0.58403   | 0.16223  | 0.76466 | 0.7152   | ↓ | -0.48357   | 0.0439    | 0.53501 | 0.6148   | ↓ | -0.70181  |
| P68871     | Hemoglobin subunit beta                                          | 0.0063975   | 0.078671   | 1.7595  | ↑ | 0.81516   | 0.014951 | 0.55131 | 0.53213  | ↓ | -0.91015   | 0.016595  | 0.53501 | 0.50036  | ↓ | -0.99897  |
| P02042     | Hemoglobin subunit delta                                         | 0.000721    | 0.02127    | 1.923   | ↑ | 0.94335   | 0.42278  | 0.8226  | 0.80327  | ↓ | -0.31604   | 0.20006   | 0.68625 | 0.84144  | ↓ | -0.24908  |
| P02790     | Hemopexin                                                        | 0.0030715   | 0.060406   | 1.3957  | ↓ | 0.481     | 0.40277  | 0.8226  | 0.91287  | ↓ | -0.13152   | 0.077769  | 0.53501 | 0.78589  | ↓ | -0.3476   |
| P05546     | Heparin cofactor 2                                               | 0.063016    | 0.24325    | 0.8577  | ↓ | -0.22146  | 0.22113  | 0.76886 | 1.1432   | ↑ | 0.19312    | 0.12805   | 0.57067 | 1.2049   | ↑ | 0.2689    |
| Q04756     | Hepatocyte growth factor activator                               | 0.64331     | 0.81449    | 0.94479 | ↓ | -0.081931 | 0.096235 | 0.76466 | 1.298    | ↑ | 0.37628    | 0.50625   | 0.82968 | 1.0834   | ↑ | 0.11551   |
| G3XAK1     | Hepatocyte growth factor-like protein                            | 0.89975     | 0.95478    | 1.0063  | ↑ | 0.0090907 | 0.9278   | 0.99145 | 1.0158   | ↑ | 0.022656   | 0.95778   | 0.98204 | 1.0166   | ↑ | 0.023709  |
| P04196     | Histidine-rich glycoprotein                                      | 0.000037663 | 0.0024101  | 0.69482 | ↓ | -0.52529  | 0.24979  | 0.77351 | 0.9039   | ↓ | -0.14577   | 0.78679   | 0.95577 | 1.0024   | ↑ | 0.0034568 |
| Q14520     | Hyaluronan-binding protein 2                                     | 0.52881     | 0.7324     | 1.0354  | ↑ | 0.050221  | 0.59657  | 0.86564 | 0.96034  | ↓ | -0.058388  | 0.87765   | 0.98065 | 1.0008   | ↑ | 0.0011045 |
| A0A087WXI2 | IgGfC-binding protein                                            | 0.58289     | 0.76764    | 1.1092  | ↑ | 0.14947   | 0.16203  | 0.76466 | 0.76746  | ↓ | -0.38184   | 0.92205   | 0.98204 | 0.947    | ↓ | -0.078562 |
| A0A0G2JMB2 | Immunoglobulin heavy constant alpha 2 (Fragment)                 | 0.94982     | 0.97294    | 0.78288 | ↓ | -0.35314  | 0.2286   | 0.76886 | 0.67413  | ↓ | -0.56891   | 0.96029   | 0.98204 | 1.3991   | ↑ | 0.48446   |
| P01871     | Immunoglobulin heavy constant mu                                 | 0.82078     | 0.90829    | 1.0181  | ↓ | 0.025927  | 0.74028  | 0.90775 | 0.99744  | ↓ | -0.0037049 | 0.10041   | 0.53501 | 0.78628  | ↓ | -0.34689  |
| A0A0B4J2H0 | Immunoglobulin heavy variable 1-69D                              | 0.13912     | 0.36319    | 0.79668 | ↓ | -0.32793  | 0.34243  | 0.8226  | 1.1833   | ↑ | 0.24284    | 0.073583  | 0.53501 | 1.3691   | ↑ | 0.45319   |
| A0A075B7D8 | Immunoglobulin heavy variable 3/OR15-7 (pseudogene) (Fragment)   | 0.17782     | 0.41631    | 1.2942  | ↑ | 0.37203   | 0.14957  | 0.76466 | 0.70638  | ↓ | -0.50149   | 0.073389  | 0.53501 | 0.6194   | ↓ | -0.69106  |
| A0A4W8ZXM2 | Immunoglobulin heavy variable 3-72                               | 0.9489      | 0.97294    | 0.89909 | ↓ | -0.15346  | 0.61633  | 0.86581 | 0.95863  | ↓ | -0.060949  | 0.79557   | 0.95577 | 1.0364   | ↑ | 0.051591  |
| A0A075B6R2 | Immunoglobulin heavy variable 4-4                                | 0.43967     | 0.67203    | 0.75831 | ↓ | -0.39913  | 0.090849 | 0.76466 | 1.7703   | ↑ | 0.82397    | 0.99571   | 0.99571 | 1.0533   | ↑ | 0.074954  |
| D6RD17     | Immunoglobulin J chain (Fragment)                                | 0.11695     | 0.33348    | 1.551   | ↑ | 0.63322   | 0.87313  | 0.96424 | 1.2364   | ↑ | 0.30617    | 0.071454  | 0.53501 | 0.57088  | ↓ | -0.80874  |
| A0A5H1ZRQ3 | Immunoglobulin kappa constant (Fragment)                         | 0.89057     | 0.94844    | 0.94042 | ↓ | -0.088624 | 0.65541  | 0.87487 | 1.5688   | ↑ | 0.64967    | 0.44304   | 0.78262 | 2.2092   | ↑ | 1.1435    |
| A0A075B6P5 | Immunoglobulin kappa variable 2-28                               | 0.7149      | 0.85383    | 0.80339 | ↓ | -0.31582  | 0.5505   | 0.8371  | 0.7186   | ↓ | -0.47673   | 0.70272   | 0.92545 | 0.76611  | ↓ | -0.38438  |
| P0CF74     | Immunoglobulin lambda constant 6                                 | 0.34297     | 0.59749    | 1.4678  | ↑ | 0.55369   | 0.85727  | 0.95571 | 0.753    | ↓ | -0.40928   | 0.40959   | 0.78262 | 0.60949  | ↓ | -0.71432  |
| A0A075B6K5 | Immunoglobulin lambda variable 3-9                               | 0.40362     | 0.64773    | 0.88469 | ↓ | -0.17676  | 0.17443  | 0.76466 | 1.2629   | ↑ | 0.33678    | 0.37205   | 0.78262 | 1.1365   | ↑ | 0.1846    |
| P15814     | Immunoglobulin lambda-like polypeptide 1                         | 0.50986     | 0.72822    | 2.0052  | ↑ | 1.0037    | 0.73222  | 0.90758 | 0.63693  | ↓ | -0.6508    | 0.68793   | 0.91373 | 0.8844   | ↓ | -0.17723  |



|            |                                                                        |            |          |         |   |           |           |         |         |   |           |          |         |         |   |            |
|------------|------------------------------------------------------------------------|------------|----------|---------|---|-----------|-----------|---------|---------|---|-----------|----------|---------|---------|---|------------|
| P05019     | Insulin-like growth factor I                                           | 0.30504    | 0.58305  | 0.91706 | ↓ | -0.12492  | 0.026486  | 0.76466 | 1.2163  | ↑ | 0.28249   | 0.46514  | 0.80234 | 1.0846  | ↑ | 0.11717    |
| P01344     | Insulin-like growth factor II                                          | 0.093834   | 0.29784  | 1.1617  | ↑ | 0.21626   | 0.30942   | 0.8226  | 0.8926  | ↓ | -0.16391  | 0.59866  | 0.86892 | 0.9742  | ↓ | -0.037708  |
| P18065     | Insulin-like growth factor-binding protein 2                           | 0.27124    | 0.56349  | 0.77702 | ↓ | -0.36398  | 0.53074   | 0.8371  | 1.1692  | ↑ | 0.22557   | 0.46978  | 0.80234 | 1.4551  | ↓ | 0.54114    |
| A6XND0     | Insulin-like growth factor-binding protein 3                           | 0.37567    | 0.62611  | 1.0556  | ↑ | 0.078057  | 0.48932   | 0.8371  | 1.0705  | ↑ | 0.098242  | 0.19537  | 0.68611 | 0.90551 | ↓ | -0.1432    |
| A0A3B3IUE0 | Insulin-like growth factor-binding protein 6                           | 0.55554    | 0.74494  | 1.0634  | ↑ | 0.08866   | 0.57983   | 0.85691 | 1.0758  | ↑ | 0.10548   | 0.79701  | 0.95577 | 1.0355  | ↑ | 0.050375   |
| P35858     | Insulin-like growth factor-binding protein complex acid labile subunit | 0.95972    | 0.97294  | 0.98708 | ↓ | -0.018768 | 0.18932   | 0.76466 | 0.8333  | ↓ | -0.2631   | 0.084629 | 0.53501 | 0.76543 | ↓ | -0.38566   |
| P19827     | Inter-alpha-trypsin inhibitor heavy chain H1                           | 0.33686    | 0.59586  | 0.93856 | ↓ | -0.091474 | 0.0083346 | 0.42621 | 0.86772 | ↓ | -0.2047   | 0.23942  | 0.73744 | 0.92218 | ↓ | -0.11688   |
| P19823     | Inter-alpha-trypsin inhibitor heavy chain H2                           | 0.042706   | 0.19167  | 0.88711 | ↓ | -0.17282  | 0.38237   | 0.8226  | 0.94697 | ↓ | -0.078613 | 0.24606  | 0.73744 | 1.0805  | ↑ | 0.1117     |
| A0A087WW43 | Inter-alpha-trypsin inhibitor heavy chain H3                           | 0.519      | 0.7324   | 1.0451  | ↑ | 0.063693  | 0.70229   | 0.89584 | 1.0253  | ↑ | 0.036097  | 0.98329  | 0.98664 | 1.0024  | ↑ | 0.0034108  |
| Q9NPH3     | Interleukin-1 receptor accessory protein                               | 0.35899    | 0.60902  | 0.81831 | ↓ | -0.28929  | 0.54481   | 0.8371  | 1.6344  | ↑ | 0.70875   | 0.82297  | 0.968   | 1.0175  | ↓ | 0.025095   |
| P27930     | Interleukin-1 receptor type 2                                          | 0.094444   | 0.29784  | 1.4451  | ↑ | 0.53119   | 0.54364   | 0.8371  | 0.84567 | ↓ | -0.24183  | 0.13813  | 0.58713 | 0.67794 | ↓ | -0.56076   |
| B7ZKJ8     | ITIH4 protein                                                          | 0.0025952  | 0.054685 | 1.2217  | ↑ | 0.28893   | 0.51672   | 0.8371  | 1.0345  | ↑ | 0.048936  | 0.25552  | 0.73744 | 0.92347 | ↓ | -0.11486   |
| P29622     | Kallistatin                                                            | 0.093785   | 0.29784  | 1.1397  | ↑ | 0.18871   | 0.12496   | 0.76466 | 0.84817 | ↓ | -0.23757  | 0.06681  | 0.53501 | 0.80801 | ↓ | -0.30756   |
| A0A1B0GVI3 | Keratin, type I cytoskeletal 10                                        | 0.60458    | 0.78418  | 0.88449 | ↓ | -0.17708  | 0.35376   | 0.8226  | 1.2812  | ↑ | 0.35753   | 0.36141  | 0.78262 | 1.6697  | ↓ | 0.73962    |
| P08779     | Keratin, type I cytoskeletal 16                                        | 0.65689    | 0.82111  | 0.79002 | ↓ | -0.34004  | 0.40578   | 0.8226  | 1.0489  | ↑ | 0.068908  | 0.40793  | 0.78262 | 1.4376  | ↑ | 0.52364    |
| P35527     | Keratin, type I cytoskeletal 9                                         | 0.13852    | 0.36319  | 0.40535 | ↓ | -1.3028   | 0.047152  | 0.76466 | 1.3623  | ↑ | 0.44609   | 0.24169  | 0.73744 | 2.326   | ↑ | 1.2178     |
| P04264     | Keratin, type II cytoskeletal 1                                        | 0.13397    | 0.35929  | 0.45979 | ↓ | -1.121    | 0.1406    | 0.76466 | 1.3397  | ↑ | 0.42192   | 0.3447   | 0.78262 | 2.285   | ↑ | 1.1922     |
| P35908     | Keratin, type II cytoskeletal 2 epidermal                              | 0.029946   | 0.16062  | 0.78592 | ↓ | -0.34754  | 0.0084409 | 0.42621 | 1.2191  | ↑ | 0.28583   | 0.23456  | 0.73744 | 1.3986  | ↑ | 0.48402    |
| P13647     | Keratin, type II cytoskeletal 5                                        | 0.72765    | 0.86214  | 0.90502 | ↓ | -0.14398  | 0.37312   | 0.8226  | 1.324   | ↑ | 0.40489   | 0.18984  | 0.67474 | 3.9682  | ↑ | 1.9885     |
| P02538     | Keratin, type II cytoskeletal 6A                                       | 0.31766    | 0.5931   | 0.90145 | ↓ | -0.14969  | 0.85651   | 0.95571 | 1.0395  | ↑ | 0.05587   | 0.25998  | 0.73744 | 2.6537  | ↑ | 1.408      |
| P04259     | Keratin, type II cytoskeletal 6B                                       | 0.36901    | 0.61851  | 1.1095  | ↓ | 0.14988   | 0.26797   | 0.79849 | 0.83113 | ↓ | -0.26686  | 0.56917  | 0.84383 | 2.5549  | ↑ | 1.3533     |
| P01042     | Kininogen-1                                                            | 0.82447    | 0.90829  | 0.99074 | ↓ | -0.013418 | 0.44754   | 0.83034 | 1.0519  | ↑ | 0.073003  | 0.47304  | 0.80234 | 0.92175 | ↓ | -0.11755   |
| E7EQB2     | Lactotransferrin (Fragment)                                            | 0.72771    | 0.86214  | 1.1469  | ↑ | 0.19773   | 0.8825    | 0.96424 | 1.1846  | ↑ | 0.24437   | 0.84442  | 0.96875 | 0.83628 | ↓ | -0.25795   |
| C9JD84     | Latent-transforming growth factor beta-binding protein 1               | 0.5521     | 0.74494  | 0.91298 | ↓ | -0.13135  | 0.51713   | 0.8371  | 1.184   | ↑ | 0.24362   | 0.16234  | 0.60146 | 1.2504  | ↓ | 0.32236    |
| P02750     | Leucine-rich alpha-2-glycoprotein                                      | 0.06429    | 0.24325  | 1.2539  | ↑ | 0.32642   | 0.78159   | 0.90775 | 0.94994 | ↓ | -0.074087 | 0.87036  | 0.98065 | 0.9287  | ↓ | -0.039686  |
| A0A3B3IS95 | L-lactate dehydrogenase                                                | 0.32943    | 0.59586  | 1.9005  | ↑ | 0.92636   | 0.64511   | 0.87487 | 0.92435 | ↓ | -0.11348  | 0.77951  | 0.95577 | 0.79067 | ↓ | -0.33885   |
| C9JC71     | Low affinity immunoglobulin gamma Fc region receptor III-A (Fragment)  | 0.70545    | 0.84942  | 1.5355  | ↑ | 0.61874   | 0.32895   | 0.8226  | 0.42843 | ↓ | -1.2229   | 0.79492  | 0.95577 | 0.63378 | ↓ | -0.65795   |
| P51884     | Lumican                                                                | 0.034421   | 0.17276  | 0.89522 | ↓ | -0.15969  | 0.75214   | 0.90775 | 0.98811 | ↓ | -0.017254 | 0.96083  | 0.98204 | 1.0183  | ↑ | 0.026229   |
| E9PEK4     | Macrophage colony-stimulating factor 1 receptor                        | 0.79262    | 0.90112  | 1.2246  | ↓ | 0.29229   | 0.16421   | 0.76466 | 0.43203 | ↓ | -1.2108   | 0.49229  | 0.82049 | 0.71149 | ↓ | -0.49109   |
| P48740     | Mannan-binding lectin serine protease 1                                | 0.86662    | 0.93991  | 0.97764 | ↓ | -0.032627 | 0.46405   | 0.8371  | 1.0715  | ↑ | 0.099592  | 0.81378  | 0.96411 | 1.0482  | ↑ | 0.067959   |
| O00187     | Mannan-binding lectin serine protease 2                                | 0.14324    | 0.36427  | 1.1645  | ↓ | 0.21971   | 0.75737   | 0.90775 | 0.95863 | ↓ | -0.060958 | 0.40097  | 0.78262 | 0.89881 | ↓ | -0.15391   |
| P33908     | Mannosyl-oligosaccharide 1,2-alpha-mannosidase IA                      | 0.18404    | 0.42088  | 0.87525 | ↓ | -0.19223  | 0.18993   | 0.76466 | 1.7355  | ↑ | 0.79532   | 0.32467  | 0.78262 | 1.0877  | ↓ | 0.1213     |
| Q16853     | Membrane primary amine oxidase                                         | 0.00049911 | 0.017252 | 0.63665 | ↓ | -0.65143  | 0.43123   | 0.8226  | 1.1325  | ↑ | 0.17955   | 0.1513   | 0.60146 | 1.2105  | ↑ | 0.27556    |
| P08571     | Monocyte differentiation antigen CD14                                  | 0.29583    | 0.58179  | 0.90892 | ↓ | -0.13777  | 0.79208   | 0.91596 | 1.0343  | ↑ | 0.048655  | 0.54918  | 0.84383 | 1.0569  | ↓ | 0.079799   |
| P03971     | Muellerian-inhibiting factor                                           | 0.76495    | 0.88517  | 0.95795 | ↓ | -0.061972 | 0.7042    | 0.89584 | 0.936   | ↓ | -0.095416 | 0.35271  | 0.78262 | 0.84785 | ↓ | -0.23812   |
| Q7Z7M0     | Multiple epidermal growth factor-like domains protein 8                | 0.714      | 0.85383  | 1.0574  | ↑ | 0.8080569 | 0.65906   | 0.87578 | 1.0901  | ↑ | 0.12445   | 0.78666  | 0.95577 | 0.93468 | ↓ | -0.097463  |
| P05164     | Myeloperoxidase                                                        | 0.92204    | 0.96798  | 1.0924  | ↑ | 0.12751   | 0.33285   | 0.8226  | 1.4351  | ↑ | 0.52113   | 0.71031  | 0.93118 | 0.96639 | ↓ | -0.049322  |
| F8W1R7     | Myosin light polypeptide 6                                             | 0.042306   | 0.19167  | 0.81043 | ↓ | -0.30324  | 0.19875   | 0.76466 | 1.2115  | ↑ | 0.27682   | 0.11783  | 0.55175 | 1.1795  | ↑ | 0.23819    |
| P12882     | Myosin-1                                                               | 0.6697     | 0.83009  | 1.2236  | ↑ | 0.29111   | 0.24916   | 0.77351 | 1.234   | ↑ | 0.3033    | 0.92253  | 0.98204 | 0.88078 | ↓ | -0.18314   |
| P35579     | Myosin-9                                                               | 0.64807    | 0.81702  | 1.0546  | ↑ | 0.076739  | 0.62484   | 0.86635 | 0.94145 | ↓ | -0.087042 | 0.54037  | 0.84383 | 1.0569  | ↑ | 0.07989    |
| Q96PD5     | N-acetylmuramoyl-L-alanine amidase                                     | 0.65099    | 0.8172   | 0.8965  | ↓ | -0.15763  | 0.67577   | 0.88996 | 0.93151 | ↓ | -0.10236  | 0.15673  | 0.60146 | 0.73406 | ↓ | -0.44604   |
| Q15223     | Nectin-1                                                               | 0.36534    | 0.61586  | 1.1294  | ↑ | 0.17554   | 0.37455   | 0.8226  | 0.85802 | ↓ | -0.22091  | 0.046319 | 0.53501 | 0.6842  | ↓ | -0.54752   |
| A0A087WTE4 | Neural cell adhesion molecule 1                                        | 0.052931   | 0.21377  | 1.1789  | ↑ | 0.23747   | 0.51182   | 0.8371  | 0.93803 | ↓ | -0.09229  | 0.15788  | 0.60146 | 0.87007 | ↓ | -0.20079   |
| A0A087X0M8 | Neural cell adhesion molecule L1-like protein                          | 0.92041    | 0.96798  | 0.94741 | ↓ | -0.077934 | 0.79863   | 0.91672 | 1.0317  | ↑ | 0.044961  | 0.34312  | 0.78262 | 1.2392  | ↓ | 0.30937    |
| P04746     | Pancreatic alpha-amylase                                               | 0.028342   | 0.1576   | 2.5392  | ↑ | 1.3444    | 0.71564   | 0.89836 | 0.81752 | ↓ | -0.29068  | 0.33253  | 0.78262 | 0.63295 | ↓ | -0.65985   |
| Q95497     | Pantetheinase                                                          | 0.18775    | 0.4228   | 1.142   | ↑ | 0.1916    | 0.17709   | 0.76466 | 0.84736 | ↓ | -0.23895  | 0.55061  | 0.84383 | 1.7368  | ↑ | 0.79646    |
| A0A1B0GU03 | Peptidase A1 domain-containing protein                                 | 0.10113    | 0.29835  | 1.5685  | ↑ | 0.64941   | 0.3629    | 0.8226  | 1.1181  | ↑ | 0.16106   | 0.87455  | 0.98065 | 0.95185 | ↓ | -0.071201  |
| P62937     | Peptidyl-prolyl cis-trans isomerase A                                  | 0.03745    | 0.17825  | 2.0537  | ↑ | 1.0383    | 0.12505   | 0.76466 | 1.3593  | ↑ | 0.44281   | 0.17525  | 0.63048 | 2.2909  | ↑ | 1.1959     |
| B1ALD9     | Periostin                                                              | 0.83287    | 0.91128  | 0.98385 | ↓ | -0.023492 | 0.10007   | 0.76466 | 1.2949  | ↑ | 0.3728    | 0.50081  | 0.82968 | 1.0676  | ↑ | 0.094364   |
| A0A0A0MRQ5 | Peroxisome oxidase-1                                                   | 0.0839     | 1.4219   | 0.50778 | ↑ | 0.50778   | 0.31108   | 0.8226  | 0.81631 | ↓ | -0.29281  | 0.56923  | 0.84383 | 1.1996  | ↑ | 0.26251    |
| P32119     | Peroxisome oxidase-2                                                   | 0.67704    | 0.8322   | 1.0891  | ↑ | 0.12315   | 0.88167   | 0.96424 | 0.98602 | ↓ | -0.020317 | 0.9296   | 0.98204 | 0.99733 | ↓ | -0.0038522 |
| P30041     | Peroxisome oxidase-6                                                   | 0.086935   | 0.29471  | 2.8004  | ↑ | 1.4856    | 0.38278   | 0.8226  | 0.53438 | ↓ | -0.90405  | 0.15817  | 0.60146 | 0.45104 | ↓ | -1.1487    |
| P04180     | Phosphatidylcholine-sterol acyltransferase                             | 0.60608    | 0.78418  | 1.1962  | ↑ | 0.25841   | 0.36569   | 0.8226  | 0.7569  | ↓ | -0.40182  | 0.34215  | 0.78262 | 0.7664  | ↓ | -0.38383   |
| P80108     | Phosphatidylinositol-glycan-specific phospholipase D                   | 0.043592   | 0.19194  | 0.84113 | ↓ | -0.24961  | 0.99228   | 0.99461 | 1.0125  | ↑ | 0.017955  | 0.76462  | 0.95577 | 1.0546  | ↑ | 0.076691   |
| P18669     | Phosphoglycerate mutase 1                                              | 0.0064003  | 0.078671 | 4.5416  | ↑ | 2.1832    | 0.65255   | 0.87487 | 1.1769  | ↑ | 0.23497   | 0.097081 | 0.53501 | 2.456   | ↑ | 1.2963     |
| P55058     | Phospholipid transfer protein                                          | 0.32812    | 0.59586  | 1.1304  | ↑ | 0.17684   | 0.7588    | 0.90775 | 1.0472  | ↑ | 0.066551  | 0.54934  | 0.84383 | 0.90765 | ↓ | -0.13979   |
| P36955     | Pigment epithelium-derived factor                                      | 0.01123    | 0.097438 | 0.8674  | ↓ | -0.20523  | 0.35217   | 0.8226  | 1.0645  | ↑ | 0.09018   | 0.1328   | 0.57612 | 1.1547  | ↑ | 0.20755    |
| H0YAC1     | Plasma kallikrein (Fragment)                                           | 0.53462    | 0.73355  | 1.0377  | ↑ | 0.053361  | 0.64665   | 0.87487 | 0.96789 | ↓ | -0.047084 | 0.10262  | 0.53501 | 0.86931 | ↓ | -0.20207   |
| A0A7I2V2D2 | Plasma protease C1 inhibitor                                           | 0.87677    | 0.94397  | 0.96459 | ↓ | -0.052012 | 0.46273   | 0.8371  | 1.0998  | ↑ | 0.13725   | 0.12602  | 0.57067 | 1.12    | ↑ | 0.16354    |

|            |                                                             |            |          |         |   |           |          |         |         |   |           |          |         |         |   |            |
|------------|-------------------------------------------------------------|------------|----------|---------|---|-----------|----------|---------|---------|---|-----------|----------|---------|---------|---|------------|
| P00747     | Plasminogen                                                 | 0.61527    | 0.79259  | 1.0229  | ↑ | 0.03261   | 0.41011  | 0.8226  | 0.94903 | ↓ | -0.075474 | 0.38949  | 0.78262 | 0.93802 | ↓ | -0.092309  |
| P13796     | Plastin-2                                                   | 0.013736   | 0.10861  | 1.1972  | ↑ | 0.25969   | 0.51448  | 0.8371  | 1.0583  | ↑ | 0.081713  | 0.099127 | 0.53501 | 0.86355 | ↓ | -0.21165   |
| P02775     | Platelet basic protein                                      | 0.37948    | 0.62891  | 0.73883 | ↓ | -0.43669  | 0.34732  | 0.8226  | 0.75882 | ↓ | -0.39817  | 0.51536  | 0.83077 | 1.9699  | ↑ | 0.97811    |
| P02776     | Platelet factor 4                                           | 0.992      | 0.99619  | 0.98367 | ↓ | -0.023756 | 0.77859  | 0.90775 | 1.1855  | ↑ | 0.24545   | 0.25569  | 0.73744 | 0.73724 | ↓ | -0.43979   |
| P10720     | Platelet factor 4 variant                                   | 0.39544    | 0.64568  | 0.89722 | ↓ | -0.15647  | 0.067918 | 0.76466 | 1.6104  | ↑ | 0.6874    | 0.26816  | 0.7534  | 1.1613  | ↑ | 0.21569    |
| P08567     | Pleckstrin                                                  | 0.019495   | 0.12867  | 2.8516  | ↑ | 1.5117    | 0.55655  | 0.84196 | 1.0861  | ↑ | 0.11912   | 0.38587  | 0.78262 | 1.2228  | ↑ | 0.29023    |
| P20742     | Pregnancy zone protein                                      | 0.0070213  | 0.079665 | 0.7644  | ↓ | -0.38761  | 0.14536  | 0.76466 | 1.1162  | ↑ | 0.15862   | 0.43772  | 0.78262 | 1.0771  | ↑ | 0.10709    |
| F8W8W4     | Prenylcysteine oxidase 1                                    | 0.99281    | 0.99619  | 1.0023  | ↓ | 0.0032591 | 0.50148  | 0.8371  | 1.0752  | ↑ | 0.10458   | 0.58011  | 0.85141 | 1.0934  | ↑ | 0.12878    |
| A0A075B6R9 | Probable non-functional immunoglobulin kappa variable 2D-24 | 0.67412    | 0.83207  | 1.1668  | ↑ | 0.22257   | 0.60906  | 0.86581 | 0.76161 | ↓ | -0.39287  | 0.77692  | 0.95577 | 0.81019 | ↓ | -0.30367   |
| Q15113     | Procollagen C-endopeptidase enhancer 1                      | 0.073162   | 0.26015  | 0.62413 | ↓ | -0.68009  | 0.56053  | 0.84365 | 1.6981  | ↑ | 0.76393   | 0.10034  | 0.53501 | 0.80738 | ↓ | -0.30869   |
| P07737     | Profilin-1                                                  | 0.014013   | 0.10861  | 3.8864  | ↑ | 1.9584    | 0.71561  | 0.89836 | 0.96602 | ↓ | -0.049869 | 0.96396  | 0.98204 | 0.99046 | ↓ | -0.013829  |
| P12273     | Prolactin-inducible protein                                 | 0.26474    | 0.55389  | 8.4639  | ↑ | 3.0813    | 0.68073  | 0.88996 | 0.34847 | ↓ | -1.5209   | 0.43984  | 0.78262 | 0.19363 | ↓ | -2.3686    |
| P02760     | Protein AMBP                                                | 0.83405    | 0.91128  | 0.98693 | ↓ | -0.018981 | 0.15169  | 0.76466 | 1.1382  | ↑ | 0.18673   | 0.035719 | 0.53501 | 1.2005  | ↑ | 0.26365    |
| P05109     | Protein S100-A8                                             | 0.011963   | 0.10083  | 5.983   | ↑ | 2.5809    | 0.36455  | 0.8226  | 0.76478 | ↓ | -0.38689  | 0.28174  | 0.76882 | 1.0017  | ↑ | 0.0024522  |
| P06702     | Protein S100-A9                                             | 0.10841    | 0.31355  | 1.8664  | ↑ | 0.90028   | 0.98361  | 0.99461 | 1.1975  | ↑ | 0.26001   | 0.97941  | 0.9861  | 1.7233  | ↑ | 0.78515    |
| G3V2W1     | Protein Z-dependent protease inhibitor                      | 0.46913    | 0.69633  | 1.0346  | ↑ | 0.049056  | 0.63268  | 0.87215 | 0.9704  | ↓ | -0.043355 | 0.10909  | 0.53501 | 0.86174 | ↓ | -0.21468   |
| Q92954     | Proteoglycan 4                                              | 0.034532   | 0.17276  | 1.2756  | ↑ | 0.35117   | 0.435    | 0.8226  | 0.90566 | ↓ | -0.14297  | 0.053873 | 0.53501 | 0.77906 | ↓ | -0.36019   |
| P00734     | Prothrombin                                                 | 0.00037124 | 0.015645 | 0.77408 | ↓ | -0.36944  | 0.84621  | 0.95571 | 1.0205  | ↑ | 0.02934   | 0.8269   | 0.968   | 1.0722  | ↓ | 0.10058    |
| Q9NPG4     | Protocadherin-12                                            | 0.80658    | 0.90525  | 1.0315  | ↑ | 0.044773  | 0.33978  | 0.8226  | 2.1928  | ↑ | 1.1328    | 0.25493  | 0.73744 | 1.4102  | ↑ | 0.49587    |
| Q16609     | Putative apolipoprotein(a)-like protein 2                   | 0.13117    | 0.355    | 0.57033 | ↓ | -0.81014  | 0.067742 | 0.76466 | 2.0275  | ↑ | 1.0197    | 0.88459  | 0.98065 | 1.4094  | ↑ | 0.49506    |
| Q6ZMU1     | Putative protein C3P1                                       | 0.14277    | 0.36427  | 1.1795  | ↑ | 0.23822   | 0.61715  | 0.86581 | 0.91152 | ↓ | -0.13366  | 0.40052  | 0.78262 | 0.9108  | ↓ | -0.1348    |
| Q6UXR4     | Putative serpin A13                                         | 0.17767    | 0.41631  | 0.71166 | ↓ | -0.49074  | 0.77542  | 0.90775 | 1.0451  | ↓ | 0.063701  | 0.40575  | 0.78262 | 1.2681  | ↑ | 0.34265    |
| A0A804F6T5 | Pyruvate kinase PKM                                         | 0.18334    | 0.42088  | 0.90957 | ↓ | -0.13674  | 0.072712 | 0.76466 | 1.2189  | ↑ | 0.2856    | 0.099961 | 0.53501 | 1.1683  | ↑ | 0.22444    |
| A6NIZ1     | Ras-related protein Rap-1b-like protein                     | 0.0091396  | 0.086974 | 1.8549  | ↑ | 0.89137   | 0.9496   | 0.99461 | 1.0064  | ↑ | 0.0091932 | 0.71338  | 0.93118 | 0.88695 | ↓ | -0.17307   |
| P23470     | Receptor-type tyrosine-protein phosphatase gamma            | 0.11973    | 0.33348  | 1.1868  | ↑ | 0.24703   | 0.64735  | 0.87487 | 0.9564  | ↓ | -0.06432  | 0.08534  | 0.53501 | 0.76954 | ↓ | -0.37792   |
| P02753     | Retinol-binding protein 4                                   | 0.80706    | 0.90525  | 0.97964 | ↓ | -0.029671 | 0.41708  | 0.8226  | 0.96078 | ↓ | -0.057719 | 0.10938  | 0.53501 | 0.88902 | ↓ | -0.16971   |
| O95980     | Reversion-inducing cysteine-rich protein with Kazal motifs  | 0.55447    | 0.74494  | 1.058   | ↑ | 0.081324  | 0.35662  | 0.8226  | 0.84908 | ↓ | -0.23603  | 0.2368   | 0.73744 | 0.80857 | ↓ | -0.30655   |
| J3KRE2     | Rho GDP-dissociation inhibitor 1                            | 0.060685   | 0.23869  | 1.5609  | ↑ | 0.64242   | 0.080861 | 0.76466 | 1.7589  | ↑ | 0.81468   | 0.80086  | 0.95649 | 1.0818  | ↑ | 0.11341    |
| A0A096LPE2 | SAA2-SAA4 readthrough                                       | 0.021551   | 0.13527  | 5.4445  | ↑ | 2.4448    | 0.96511  | 0.99461 | 0.79618 | ↓ | -0.32883  | 0.84725  | 0.96875 | 0.69397 | ↓ | -0.52705   |
| C9JHR8     | Scavenger receptor cysteine-rich type 1 protein M130        | 0.74516    | 0.87804  | 0.96379 | ↓ | -0.053209 | 0.43033  | 0.8226  | 1.1495  | ↑ | 0.20105   | 0.64007  | 0.89489 | 1.0723  | ↑ | 0.10072    |
| A0A182DWH7 | Selenoprotein P (Fragment)                                  | 0.98352    | 0.99363  | 0.96992 | ↓ | -0.044062 | 0.39555  | 0.8226  | 0.49796 | ↓ | -1.0059   | 0.59405  | 0.86754 | 0.66349 | ↓ | -0.59186   |
| P02787     | Serotransferrin                                             | 0.025156   | 0.15026  | 0.78915 | ↓ | -0.34162  | 0.24887  | 0.77351 | 1.1023  | ↑ | 0.14047   | 0.95885  | 0.98204 | 0.98348 | ↓ | -0.024037  |
| P02743     | Serum amyloid P-component                                   | 0.9489     | 0.97294  | 1.1681  | ↑ | 0.22416   | 0.51519  | 0.8371  | 0.47383 | ↓ | -1.0776   | 0.57661  | 0.85051 | 0.66178 | ↓ | -0.59557   |
| A0A0C4DGN2 | Sex hormone-binding globulin (Fragment)                     | 0.096445   | 0.29784  | 0.83958 | ↓ | -0.25226  | 0.94122  | 0.99461 | 1.0261  | ↑ | 0.037159  | 0.32365  | 0.78262 | 0.86142 | ↓ | -0.21521   |
| P09486     | SPARC                                                       | 0.92538    | 0.96804  | 0.96065 | ↓ | -0.057914 | 0.53006  | 0.8371  | 1.0822  | ↑ | 0.11391   | 0.97766  | 0.9861  | 0.90732 | ↓ | -0.14031   |
| O00391     | Sulphydryl oxidase 1                                        | 0.020528   | 0.13165  | 0.83973 | ↓ | -0.25199  | 0.085907 | 0.76466 | 1.1192  | ↑ | 0.16253   | 0.95038  | 0.98204 | 1.0541  | ↑ | 0.076057   |
| Q9Y490     | Talin-1                                                     | 0.013905   | 0.10861  | 1.3994  | ↑ | 0.48481   | 0.97378  | 0.99461 | 0.9923  | ↓ | -0.011149 | 0.65519  | 0.91171 | 1.0483  | ↑ | 0.068087   |
| A0A087WXC4 | Tenascin-N                                                  | 0.52464    | 0.7324   | 1.4753  | ↑ | 0.56105   | 0.42726  | 0.8226  | 0.62089 | ↓ | -0.6876   | 0.79607  | 0.95577 | 0.69552 | ↓ | -0.52383   |
| E9PHK0     | Tetranectin                                                 | 0.64331    | 0.81449  | 0.96479 | ↓ | -0.051713 | 0.9192   | 0.98605 | 1.055   | ↑ | 0.077266  | 0.66683  | 0.91373 | 0.97032 | ↓ | -0.043464  |
| P07996     | Thrombospondin-1                                            | 0.33873    | 0.59586  | 0.93449 | ↓ | -0.097751 | 0.086552 | 0.76466 | 1.1684  | ↑ | 0.22459   | 0.38386  | 0.78262 | 1.0855  | ↑ | 0.1184     |
| E7ES19     | Thrombospondin-4                                            | 0.34432    | 0.59749  | 0.81333 | ↓ | -0.29809  | 0.10356  | 0.76466 | 1.813   | ↑ | 0.8584    | 0.41042  | 0.78262 | 1.1341  | ↑ | 0.18158    |
| P62328     | Thymosin beta-4                                             | 0.03587    | 0.17636  | 2.3725  | ↑ | 1.2464    | 0.59861  | 0.86564 | 1.1933  | ↑ | 0.25494   | 0.77947  | 0.95577 | 1.0345  | ↑ | 0.048961   |
| P05543     | Thyroxine-binding globulin                                  | 0.096538   | 0.29784  | 1.2274  | ↑ | 0.29566   | 0.43901  | 0.82489 | 0.88726 | ↓ | -0.17257  | 0.063563 | 0.53501 | 0.74856 | ↓ | -0.41782   |
| F2Z393     | Transaldolase                                               | 0.14568    | 0.36731  | 1.4332  | ↑ | 0.51922   | 0.5174   | 0.8371  | 0.82871 | ↓ | -0.27107  | 0.63397  | 0.89057 | 0.87719 | ↓ | -0.18904   |
| Q15582     | Transforming growth factor-beta-induced protein ig-h3       | 0.75258    | 0.87804  | 0.99173 | ↓ | -0.011979 | 0.35281  | 0.8226  | 1.0963  | ↑ | 0.13258   | 0.77274  | 0.95577 | 0.99812 | ↓ | -0.0027096 |
| P37802     | Transgelin-2                                                | 0.014727   | 0.10861  | 2.9458  | ↑ | 1.5587    | 0.45565  | 0.8371  | 0.66869 | ↓ | -0.58059  | 0.67946  | 0.91373 | 1.1861  | ↑ | 0.24626    |
| A0A087WT59 | Transthyretin                                               | 0.23152    | 0.49853  | 1.4648  | ↑ | 0.55074   | 0.60588  | 0.86581 | 1.5427  | ↑ | 0.62549   | 0.39541  | 0.78262 | 0.7657  | ↓ | -0.38515   |
| O43280     | Trehalase                                                   | 0.41614    | 0.65298  | 1.2578  | ↑ | 0.33085   | 0.21043  | 0.76886 | 0.51352 | ↓ | -0.96152  | 0.88757  | 0.98065 | 0.92944 | ↓ | -0.10557   |
| P60174     | Triosephosphate isomerase                                   | 0.064318   | 0.24325  | 2.3451  | ↑ | 1.2297    | 0.77327  | 0.90775 | 1.1448  | ↑ | 0.19508   | 0.25236  | 0.73744 | 1.7025  | ↑ | 0.76767    |
| P67936     | Tropomyosin alpha-4 chain                                   | 0.40235    | 0.64773  | 1.2481  | ↑ | 0.31969   | 0.18786  | 0.76466 | 1.4657  | ↑ | 0.5516    | 0.031823 | 0.53501 | 2.1604  | ↑ | 1.1113     |
| P68363     | Tubulin alpha-1B chain                                      | 0.42648    | 0.66216  | 1.4606  | ↑ | 0.54658   | 0.24884  | 0.77351 | 1.2262  | ↑ | 0.29418   | 0.16513  | 0.60146 | 1.4771  | ↑ | 0.56272    |
| P68366     | Tubulin alpha-4A chain                                      | 0.30635    | 0.58305  | 1.4089  | ↑ | 0.49454   | 0.32031  | 0.8226  | 1.2338  | ↑ | 0.30308   | 0.56116  | 0.84838 | 1.4261  | ↑ | 0.51206    |
| Q9H4B7     | Tubulin beta-1 chain                                        | 0.028849   | 0.1576   | 1.3539  | ↑ | 0.43717   | 0.40652  | 0.8226  | 0.8823  | ↓ | -0.18066  | 0.90817  | 0.98204 | 1.0521  | ↑ | 0.073334   |
| Q6EMK4     | Vasorin                                                     | 0.098034   | 0.29784  | 0.62278 | ↓ | -0.6832   | 0.055369 | 0.76466 | 1.6899  | ↑ | 0.75694   | 0.15955  | 0.60146 | 1.47    | ↑ | 0.55584    |
| A0A712V2Y2 | Vesicle-fusing ATPase                                       | 0.75303    | 0.87804  | 0.69884 | ↓ | -0.51696  | 0.20165  | 0.76466 | 1.2531  | ↑ | 0.32553   | 0.45867  | 0.79592 | 1.1737  | ↑ | 0.23106    |
| P18206     | Vinculin                                                    | 0.0075941  | 0.082147 | 1.8197  | ↑ | 0.8637    | 0.95223  | 0.99461 | 0.97854 | ↓ | -0.031304 | 0.95223  | 0.98204 | 0.99049 | ↓ | -0.01379   |
| E7END6     | Vitamin K-dependent protein C                               | 0.052782   | 0.21377  | 0.74267 | ↓ | -0.4292   | 0.88672  | 0.96424 | 1.0258  | ↑ | 0.036791  | 0.97411  | 0.9861  | 0.969   | ↓ | -0.045429  |
| A0A0S2Z4L3 | Vitamin K-dependent protein S (Fragment)                    | 0.51456    | 0.72979  | 1.0545  | ↑ | 0.076594  | 0.97915  | 0.99461 | 1.0025  | ↑ | 0.0036431 | 0.44177  | 0.78262 | 0.92139 | ↓ | -0.11812   |
| P22891     | Vitamin K-dependent protein Z                               | 0.63576    | 0.81191  | 0.98719 | ↓ | -0.018607 | 0.30307  | 0.8226  | 0.90123 | ↓ | -0.15003  | 0.60971  | 0.86892 | 0.97663 | ↓ | -0.034123  |

|        |                                                  |          |         |           |          |         |         |           |           |         |         |           |          |
|--------|--------------------------------------------------|----------|---------|-----------|----------|---------|---------|-----------|-----------|---------|---------|-----------|----------|
| Q7Z5L0 | Vitelline membrane outer layer protein 1 homolog | 0.26137  | 0.55075 | 0.73834 ↓ | -0.43765 | 0.21523 | 0.76886 | 1.44 ↑    | 0.52607   | 0.54124 | 0.84383 | 1.5903 ↑  | 0.66932  |
| P04004 | Vitronectin                                      | 0.50694  | 0.72822 | 0.92949 ↓ | -0.10548 | 0.77128 | 0.90775 | 0.96135 ↓ | -0.056861 | 0.47594 | 0.80234 | 1.0855 ↑  | 0.11834  |
| P04275 | von Willebrand factor                            | 0.047787 | 0.20431 | 1.1415 ↑  | 0.19096  | 0.38462 | 0.8226  | 1.0873 ↑  | 0.12073   | 0.25928 | 0.73744 | 0.91563 ↓ | -0.12716 |
| O75083 | WD repeat-containing protein 1                   | 0.050657 | 0.21348 | 1.9313 ↑  | 0.94958  | 0.3057  | 0.8226  | 1.4834 ↑  | 0.56893   | 0.10809 | 0.53501 | 1.6913 ↑  | 0.75817  |
| P25311 | Zinc-alpha-2-glycoprotein                        | 0.68681  | 0.83916 | 1.0509 ↑  | 0.071599 | 0.77095 | 0.90775 | 0.95514 ↓ | -0.066211 | 0.56503 | 0.84383 | 0.92674 ↓ | -0.10977 |

Supplementary Table 8. Comparison of the effects of radiation at 48 h post-irradiation.

| UniProtKB  | ProteinNames                                                      | 48 Hour vs. Pre   |                 |         |          | 48 Hour ExRad I vs. Vehicle |                   |         |          | 48 Hour ExRad II vs. Vehicle |            |                  |          |         |   |           |
|------------|-------------------------------------------------------------------|-------------------|-----------------|---------|----------|-----------------------------|-------------------|---------|----------|------------------------------|------------|------------------|----------|---------|---|-----------|
|            |                                                                   | p-value           | FDR             | FC      | Log2(FC) | p-value                     | FDR               | FC      | Log2(FC) | p-value                      | FDR        | FC               | Log2(FC) |         |   |           |
| P62258     | 14-3-3 protein epsilon                                            | 0.27313           | 0.6104          | 1.1092  | ↑        | 0.14946                     | 0.9493            | 0.98426 | 0.99439  | ↓                            | -0.0081134 | 0.22195          | 0.84494  | 0.85924 | ↓ | -0.21887  |
| P61981     | 14-3-3 protein gamma                                              | 0.32727           | 0.6451          | 1.8389  | ↑        | 0.87883                     | 0.68167           | 0.94631 | 0.7974   | ↓                            | -0.32663   | 0.61093          | 0.9541   | 0.625   | ↓ | -0.67808  |
| P63104     | 14-3-3 protein zeta/delta                                         | 0.44709           | 0.72539         | 1.0593  | ↑        | 0.083179                    | 0.4418            | 0.89035 | 1.1136   | ↑                            | 0.15525    | 0.57897          | 0.95166  | 1.0322  | ↑ | 0.045738  |
| A0A2R8Y6G6 | 2-phospho-D-glycerate hydro-lyase                                 | 0.36442           | 0.65551         | 1.1576  | ↑        | 0.21116                     | 0.18474           | 0.82645 | 0.76827  | ↓                            | -0.38031   | 0.6247           | 0.9541   | 0.88882 | ↓ | -0.17003  |
| P08253     | 72 kDa type IV collagenase                                        | 0.10398           | 0.40261         | 1.1908  | ↑        | 0.2519                      | 0.35512           | 0.82645 | 0.8874   | ↓                            | -0.17234   | 0.51403          | 0.90109  | 1.0838  | ↑ | 0.11607   |
| A0A7P0TAI0 | 78 kDa glucose-regulated protein                                  | 0.11026           | 0.41173         | 1.1543  | ↑        | 0.207                       | 0.75357           | 0.96004 | 1.0632   | ↑                            | 0.088447   | <b>0.012721</b>  | 0.5969   | 0.72321 | ↓ | -0.46752  |
| Q76LX8     | A disintegrin and metalloproteinase with thrombospondin motifs 13 | 0.18687           | 0.53008         | 1.3768  | ↑        | 0.46127                     | 0.88646           | 0.96004 | 0.96634  | ↓                            | -0.04939   | 0.40127          | 0.89152  | 0.78585 | ↓ | -0.34767  |
| Q92484     | Acid sphingomyelinase-like phosphodiesterase 3a                   | 0.53894           | 0.75708         | 1.447   | ↑        | 0.53303                     | 0.71882           | 0.94631 | 0.73299  | ↓                            | -0.44814   | 0.93277          | 0.99807  | 0.90175 | ↓ | -0.1492   |
| P68032     | Actin, alpha cardiac muscle 1                                     | 0.18487           | 0.53008         | 2.1368  | ↑        | 1.0955                      | 0.68228           | 0.94631 | 0.74784  | ↓                            | -0.4192    | 0.41244          | 0.89152  | 0.62498 | ↓ | -0.67812  |
| P60709     | Actin, cytoplasmic 1                                              | 0.25534           | 0.59781         | 2.0347  | ↑        | 1.0248                      | 0.53295           | 0.89861 | 0.72896  | ↓                            | -0.45609   | 0.76915          | 0.96358  | 0.78506 | ↓ | -0.34912  |
| I3L4N8     | Actin, cytoplasmic 2                                              | 0.1889            | 0.53071         | 1.4663  | ↑        | 0.55214                     | 0.30159           | 0.82645 | 0.72769  | ↓                            | -0.45859   | 0.41323          | 0.89152  | 0.75858 | ↓ | -0.39863  |
| Q15848     | Adiponectin                                                       | 0.31674           | 0.63563         | 1.0929  | ↑        | 0.12818                     | 0.13111           | 0.74108 | 0.82239  | ↓                            | -0.28211   | 0.18029          | 0.84079  | 0.83483 | ↓ | -0.26044  |
| K7ER99     | Adipsin                                                           | 0.08268           | 0.38715         | 1.1296  | ↑        | 0.17584                     | 0.19228           | 0.82645 | 0.8831   | ↓                            | -0.17935   | 0.094481         | 0.75239  | 0.84293 | ↓ | -0.24652  |
| P43652     | Afamin                                                            | 0.38094           | 0.66891         | 1.0644  | ↑        | 0.090028                    | 0.10858           | 0.66596 | 0.87295  | ↓                            | -0.19603   | 0.52082          | 0.90109  | 0.94796 | ↓ | -0.077099 |
| A0A0C4DGB6 | Albumin                                                           | <b>0.019155</b>   | 0.20181         | 0.48551 | ↓        | -1.0424                     | 0.26486           | 0.82645 | 1.2667   | ↑                            | 0.34107    | 0.13008          | 0.78429  | 1.317   | ↑ | 0.39725   |
| P02763     | Alpha-1-acid glycoprotein 1                                       | <b>0.0073771</b>  | 0.1356          | 4.9036  | ↑        | 2.2938                      | 0.62072           | 0.92482 | 1.4321   | ↑                            | 0.51813    | 0.76561          | 0.96358  | 1.7237  | ↑ | 0.78551   |
| P01011     | Alpha-1-antichymotrypsin                                          | <b>0.00015462</b> | <b>0.016678</b> | 5.9784  | ↑        | 2.5798                      | 0.066679          | 0.54854 | 0.49363  | ↓                            | -1.0185    | 0.072793         | 0.75239  | 0.46386 | ↓ | -1.1083   |
| A0A024R6I7 | Alpha-1-antitrypsin                                               | <b>0.047085</b>   | 0.29554         | 1.4221  | ↑        | 0.50802                     | <b>0.034877</b>   | 0.537   | 0.65591  | ↓                            | -0.60843   | 0.72325          | 0.96358  | 1.1182  | ↑ | 0.16112   |
| P04217     | Alpha-1B-glycoprotein                                             | 0.95809           | 0.9848          | 0.99234 | ↓        | -0.011089                   | 0.79035           | 0.96004 | 1.0431   | ↑                            | 0.060818   | 0.63502          | 0.9541   | 0.9444  | ↓ | -0.08253  |
| P08697     | Alpha-2-antiplasmin                                               | 0.35644           | 0.6451          | 1.0841  | ↑        | 0.11648                     | 0.2199            | 0.82645 | 0.86438  | ↓                            | -0.21027   | 0.41393          | 0.89152  | 1.0616  | ↑ | 0.086238  |
| C9JV77     | Alpha-2-HS-glycoprotein                                           | 0.44814           | 0.72539         | 0.86349 | ↓        | -0.21175                    | <b>0.043686</b>   | 0.537   | 0.69561  | ↓                            | -0.52365   | 0.27062          | 0.87225  | 0.85991 | ↓ | -0.21774  |
| P010253    | Alpha-2-macroglobulin                                             | 0.58711           | 0.77375         | 0.97127 | ↓        | -0.042059                   | 0.36684           | 0.82645 | 1.0814   | ↑                            | 0.11297    | 0.91081          | 0.99807  | 0.99733 | ↓ | -0.003854 |
| A0A7I2V4Y4 | Alpha-actinin-1                                                   | 0.70769           | 0.83843         | 0.96874 | ↓        | -0.045814                   | 0.55173           | 0.90291 | 1.0455   | ↑                            | 0.064249   | 0.83924          | 0.97906  | 1.0243  | ↑ | 0.034578  |
| A0A0C4DGL1 | Alpha-mannosidase 2x                                              | 0.97042           | 0.98486         | 0.9223  | ↓        | -0.11669                    | <b>0.035373</b>   | 0.537   | 0.71334  | ↓                            | -0.48734   | 0.78066          | 0.96358  | 0.97366 | ↓ | -0.038515 |
| P54802     | Alpha-N-acetylglucosaminidase                                     | <b>0.013815</b>   | 0.15675         | 0.8079  | ↓        | -0.30775                    | 0.48666           | 0.891   | 1.147    | ↑                            | 0.19785    | 0.065214         | 0.75239  | 1.3497  | ↑ | 0.4326    |
| A0A7P0T8D1 | Angiotensin 1-10                                                  | <b>0.011837</b>   | 0.15675         | 1.4251  | ↑        | 0.51108                     | <b>0.045385</b>   | 0.537   | 0.75583  | ↓                            | -0.40386   | 0.067951         | 0.75239  | 0.76742 | ↓ | -0.38191  |
| A0A0A0MSN4 | Angiotensin-converting enzyme                                     | 0.27208           | 0.6104          | 0.8582  | ↓        | -0.22062                    | 0.4586            | 0.89035 | 1.1497   | ↑                            | 0.20123    | 0.50937          | 0.90109  | 1.0455  | ↑ | 0.064141  |
| P04083     | Annexin A1                                                        | 0.24924           | 0.59045         | 0.77774 | ↓        | -0.36264                    | 0.060497          | 0.54081 | 1.3335   | ↑                            | 0.41518    | <b>0.049829</b>  | 0.75239  | 1.3683  | ↑ | 0.45238   |
| P01008     | Antithrombin-III                                                  | 0.20776           | 0.54722         | 1.1151  | ↑        | 0.15715                     | 0.56769           | 0.90291 | 0.94745  | ↓                            | -0.077877  | 0.19655          | 0.84494  | 0.86758 | ↓ | -0.20493  |
| F8W696     | Apolipoprotein A-I                                                | 0.07094           | 0.3547          | 0.87578 | ↓        | -0.19136                    | 0.21987           | 0.82645 | 1.0875   | ↑                            | 0.12106    | 0.85222          | 0.98205  | 1.0317  | ↑ | 0.04497   |
| P06727     | Apolipoprotein A-IV                                               | 0.89385           | 0.94585         | 1.0219  | ↑        | 0.031282                    | 0.99124           | 0.99209 | 1.0001   | ↑                            | 0.00008621 | 0.36538          | 0.89152  | 0.89622 | ↓ | -0.15808  |
| P04114     | Apolipoprotein B-100                                              | 0.087767          | 0.3887          | 1.1534  | ↑        | 0.20585                     | 0.62514           | 0.92672 | 0.95194  | ↓                            | -0.071058  | 0.16483          | 0.81079  | 0.87198 | ↓ | -0.19764  |
| K7ER74     | Apolipoprotein C-II                                               | 0.71352           | 0.8386          | 0.87271 | ↓        | -0.19643                    | 0.3092            | 0.82645 | 1.424    | ↑                            | 0.50999    | 0.081218         | 0.75239  | 1.425   | ↑ | 0.51094   |
| B0Y1W2     | Apolipoprotein C-III                                              | 0.50199           | 0.74044         | 0.82499 | ↓        | -0.27756                    | 0.15579           | 0.80627 | 1.2617   | ↑                            | 0.33542    | 0.35141          | 0.89152  | 1.2072  | ↑ | 0.2717    |
| P02649     | Apolipoprotein E                                                  | <b>0.00019669</b> | <b>0.016678</b> | 1.4878  | ↑        | 0.57316                     | 0.76941           | 0.96004 | 0.9797   | ↓                            | -0.029582  | 0.40592          | 0.89152  | 0.91917 | ↓ | -0.1216   |
| P08519     | Apolipoprotein(a)                                                 | 0.19077           | 0.53092         | 1.0498  | ↑        | 0.07016                     | <b>0.00077838</b> | 0.22962 | 0.77645  | ↓                            | -0.36503   | 0.37775          | 0.89152  | 0.92807 | ↓ | -0.10769  |
| O75882     | Attractin                                                         | 0.51432           | 0.74381         | 1.0468  | ↑        | 0.065972                    | <b>0.020388</b>   | 0.537   | 0.81147  | ↓                            | -0.30139   | 0.433            | 0.89152  | 0.9333  | ↓ | -0.099593 |
| P02749     | Beta-2-glycoprotein 1                                             | <b>0.004098</b>   | 0.11451         | 1.1206  | ↑        | 0.16427                     | 0.30356           | 0.82645 | 1.0609   | ↑                            | 0.085301   | 0.10458          | 0.75239  | 0.92396 | ↓ | -0.1141   |
| J3KRP0     | Beta-Ala-His dipeptidase                                          | 0.24663           | 0.59045         | 1.0526  | ↑        | 0.073934                    | <b>0.0058809</b>  | 0.537   | 0.75127  | ↓                            | -0.4126    | 0.90102          | 0.99807  | 1.0047  | ↑ | 0.0667218 |
| P43251     | Biotinidase                                                       | 0.26888           | 0.6104          | 1.3054  | ↑        | 0.38446                     | 0.066941          | 0.54854 | 0.62418  | ↓                            | -0.67996   | 0.57989          | 0.95166  | 0.81582 | ↓ | -0.29368  |
| J3KSD8     | Bleomycin hydrolase (Fragment)                                    | 0.54837           | 0.76306         | 0.29927 | ↓        | -1.7405                     | 0.90032           | 0.96004 | 0.81977  | ↓                            | -0.2867    | 0.59846          | 0.9541   | 0.63284 | ↓ | -0.66008  |
| Q9UBW5     | Bridging integrator 2                                             | 0.91961           | 0.95523         | 0.9419  | ↓        | -0.086349                   | 0.90472           | 0.96004 | 0.94428  | ↓                            | -0.082716  | 0.96867          | 0.99807  | 0.91037 | ↓ | -0.13547  |
| B4E1Z4     | C3/C5 convertase                                                  | <b>0.00022614</b> | <b>0.016678</b> | 1.2011  | ↑        | 0.26431                     | <b>0.046606</b>   | 0.537   | 0.88804  | ↓                            | -0.17131   | <b>0.0015088</b> | 0.22255  | 0.83803 | ↓ | -0.25492  |
| P04003     | C4b-binding protein alpha chain                                   | 0.34405           | 0.6451          | 1.0086  | ↑        | 0.012388                    | 0.3446            | 0.82645 | 0.92527  | ↓                            | -0.11205   | 0.99368          | 0.99807  | 1.0232  | ↑ | 0.033067  |
| P20851     | C4b-binding protein beta chain                                    | 0.5735            | 0.77375         | 0.91421 | ↓        | -0.12941                    | 0.33152           | 0.82645 | 1.1772   | ↑                            | 0.23535    | 0.51501          | 0.90109  | 1.1285  | ↑ | 0.17443   |
| H3BNC6     | Cadherin-1                                                        | 0.28371           | 0.62387         | 1.3885  | ↑        | 0.47351                     | 0.87159           | 0.96004 | 0.91688  | ↓                            | -0.1252    | 0.72914          | 0.96358  | 0.96803 | ↓ | -0.04687  |
| P55290     | Cadherin-13                                                       | 0.47195           | 0.72539         | 1.0279  | ↑        | 0.039666                    | 0.49464           | 0.891   | 1.1499   | ↑                            | 0.20153    | 0.62074          | 0.9541   | 0.96356 | ↓ | -0.053557 |
| P33151     | Cadherin-5                                                        | 0.19511           | 0.53791         | 1.1258  | ↑        | 0.17091                     | <b>0.038152</b>   | 0.537   | 0.75961  | ↓                            | -0.39667   | 0.38127          | 0.89152  | 0.89313 | ↓ | -0.16306  |
| Q9NZT1     | Calmodulin-like protein 5                                         | 0.70241           | 0.83768         | 0.51161 | ↓        | -0.96687                    | 0.34612           | 0.82645 | 0.6147   | ↓                            | -0.70204   | 0.94106          | 0.99807  | 0.86655 | ↓ | -0.20665  |
| E5RFL2     | Carbonate dehydratase I (Fragment)                                | 0.69064           | 0.83768         | 1.0954  | ↑        | 0.13144                     | 0.65839           | 0.94631 | 1.3642   | ↑                            | 0.44807    | 0.33863          | 0.89152  | 1.4804  | ↑ | 0.56602   |
| P00918     | Carbonic anhydrase 2                                              | 0.58332           | 0.77375         | 0.90324 | ↓        | -0.14682                    | 0.60362           | 0.92014 | 1.0466   | ↑                            | 0.065687   | 0.63838          | 0.9541   | 0.95461 | ↓ | -0.067011 |
| A0A087WSY5 | Carboxypeptidase B2                                               | 0.70108           | 0.83768         | 1.0191  | ↑        | 0.027229                    | 0.22508           | 0.82645 | 0.86493  | ↓                            | -0.20934   | 0.99397          | 0.99807  | 1.0182  | ↑ | 0.026034  |
| P15169     | Carboxypeptidase N catalytic chain                                | 0.43301           | 0.72539         | 0.92785 | ↓        | -0.10803                    | 0.3188            | 0.82645 | 1.1091   | ↑                            | 0.14943    | 0.1302           | 0.78429  | 0.81109 | ↓ | -0.30206  |
| P22792     | Carboxypeptidase N subunit 2                                      | 0.2405            | 0.59045         | 1.197   | ↑        | 0.25938                     | 0.11062           | 0.66596 | 0.73602  | ↓                            | -0.44219   | 0.48777          | 0.90109  | 1.0542  | ↑ | 0.07619   |

|            |                                                         |           |          |         |   |            |          |         |         |   |            |          |         |         |      |            |
|------------|---------------------------------------------------------|-----------|----------|---------|---|------------|----------|---------|---------|---|------------|----------|---------|---------|------|------------|
| E5RH35     | Carboxypeptidase Q (Fragment)                           | 0.58752   | 0.77375  | 0.71269 | ↓ | -0.48866   | 0.41215  | 0.87315 | 1.4795  | ↑ | 0.56507    | 0.088611 | 0.75239 | 0.73983 | ↓    | -0.43473   |
| A0A0C4DFP6 | Cartilage acidic protein 1                              | 0.15688   | 0.4903   | 1.088   | ↑ | 0.12164    | 0.58729  | 0.9168  | 0.96174 | ↓ | -0.05628   | 0.13736  | 0.78429 | 0.90058 | ↓    | -0.15107   |
| G3XAP6     | Cartilage oligomeric matrix protein                     | 0.39591   | 0.68701  | 0.88586 | ↓ | -0.17484   | 0.49279  | 0.891   | 1.3292  | ↓ | 0.41055    | 0.073656 | 0.75239 | 1.2497  | ↑    | 0.32159    |
| P04040     | Catalase                                                | 0.81202   | 0.89652  | 0.97    | ↓ | -0.043944  | 0.27919  | 0.82645 | 0.8808  | ↓ | -0.18311   | 0.8151   | 0.9735  | 0.98313 | ↓    | -0.024543  |
| A0A7POT816 | Cathepsin X                                             | 0.062938  | 0.32573  | 1.5726  | ↑ | 0.65319    | 0.42029  | 0.87315 | 0.81694 | ↓ | -0.29171   | 0.083266 | 0.75239 | 0.59459 | ↓    | -0.75002   |
| P11717     | Cation-independent mannose-6-phosphate receptor         | 0.20603   | 0.54722  | 1.1287  | ↑ | 0.17472    | 0.35372  | 0.82645 | 0.90517 | ↓ | -0.14373   | 0.10967  | 0.75239 | 0.83825 | ↓    | -0.25454   |
| Q6YHK3     | CD109 antigen                                           | 0.16222   | 0.49335  | 0.875   | ↓ | -0.19264   | 0.058116 | 0.537   | 1.2315  | ↑ | 0.30044    | 0.024037 | 0.61501 | 1.2493  | ↑    | 0.32114    |
| H0Y2P0     | CD44 antigen (Fragment)                                 | 0.47784   | 0.72539  | 1.0651  | ↑ | 0.09094    | 0.095385 | 0.63782 | 1.7264  | ↑ | 0.78774    | 0.52338  | 0.90109 | 0.89693 | ↓    | -0.15693   |
| O43866     | CD5 antigen-like                                        | 0.67974   | 0.83552  | 1.1088  | ↑ | 0.14894    | 0.7239   | 0.94631 | 1.1047  | ↑ | 0.14371    | 0.64821  | 0.95848 | 0.7352  | ↓    | -0.4438    |
| P00450     | Ceruloplasmin                                           | 0.013564  | 0.15675  | 1.1163  | ↑ | 0.15878    | 0.27054  | 0.82645 | 1.0667  | ↑ | 0.09311    | 0.96217  | 0.99807 | 1.0071  | ↑    | 0.010255   |
| P36222     | Chitinase-3-like protein 1                              | 0.35331   | 0.6451   | 1.2707  | ↑ | 0.34559    | 0.51107  | 0.89742 | 1.369   | ↑ | 0.4531     | 0.5086   | 0.90109 | 0.80862 | ↓    | -0.30647   |
| O00299     | Chloride intracellular channel protein 1                | 0.69682   | 0.83768  | 1.1407  | ↑ | 0.18989    | 0.87997  | 0.96004 | 0.98363 | ↓ | -0.023808  | 0.45298  | 0.90109 | 0.78622 | ↓    | -0.347     |
| H3BRJ9     | Cholesteryl ester transfer protein                      | 0.089598  | 0.3887   | 0.30149 | ↓ | -1.7298    | 0.51901  | 0.89861 | 1.0697  | ↓ | 0.097148   | 0.83097  | 0.97906 | 0.94162 | ↓    | -0.086786  |
| P06276     | Cholinesterase                                          | 0.74659   | 0.85952  | 0.93742 | ↓ | -0.093237  | 0.97731  | 0.99209 | 0.92895 | ↓ | -0.10633   | 0.64982  | 0.95848 | 1.0144  | ↑    | 0.020606   |
| P08217     | Chymotrypsin-like elastase family member 2A             | 0.069717  | 0.35459  | 1.4116  | ↑ | 0.50185    | 0.46965  | 0.891   | 0.89146 | ↓ | -0.16575   | 0.81053  | 0.97198 | 1.0442  | ↑    | 0.06245    |
| P08861     | Chymotrypsin-like elastase family member 3B             | 0.10499   | 0.40261  | 3.4899  | ↑ | 1.8032     | 0.26062  | 0.82645 | 0.52939 | ↓ | -0.91759   | 0.067596 | 0.75239 | 0.23846 | ↓    | -2.0682    |
| P10909     | Clusterin                                               | 0.7706    | 0.87228  | 0.98115 | ↓ | -0.027452  | 0.90347  | 0.96004 | 0.97384 | ↓ | -0.03824   | 0.65388  | 0.95952 | 1.0464  | ↑    | 0.065451   |
| Q14019     | Coactosin-like protein                                  | 0.67741   | 0.83552  | 1.0713  | ↑ | 0.099322   | 0.91213  | 0.96444 | 1.0008  | ↑ | 0.0012166  | 0.4671   | 0.90109 | 0.88359 | ↓    | -0.17855   |
| P00740     | Coagulation factor IX                                   | 0.013158  | 0.15675  | 1.3777  | ↑ | 0.4623     | 0.28202  | 0.82645 | 0.86097 | ↓ | -0.21597   | 0.068191 | 0.75239 | 0.77602 | ↓    | -0.36583   |
| A0A0A0MRJ7 | Coagulation factor V                                    | 0.72615   | 0.85006  | 1.0179  | ↑ | 0.02562    | 0.046226 | 0.537   | 1.225   | ↓ | 0.29277    | 0.6646   | 0.95952 | 0.96891 | ↓    | -0.04556   |
| F5H8B0     | Coagulation factor VII                                  | 0.15789   | 0.4903   | 1.4239  | ↑ | 0.50987    | 0.50903  | 0.89742 | 0.86277 | ↓ | -0.21295   | 0.67329  | 0.95952 | 1.6572  | ↑    | 0.72872    |
| P00742     | Coagulation factor X                                    | 0.89455   | 0.94585  | 0.99318 | ↓ | -0.0098777 | 0.91636  | 0.96545 | 0.99796 | ↓ | -0.0029528 | 0.43685  | 0.89152 | 1.0709  | ↑    | 0.098827   |
| P03951     | Coagulation factor XI                                   | 0.15776   | 0.4903   | 1.1135  | ↑ | 0.15516    | 0.67755  | 0.94631 | 0.98571 | ↓ | -0.020762  | 0.13983  | 0.78429 | 0.85119 | ↓    | -0.23245   |
| P00748     | Coagulation factor XII                                  | 0.3521    | 0.6451   | 0.91947 | ↓ | -0.12113   | 0.53346  | 0.89861 | 1.1357  | ↑ | 0.18357    | 0.72866  | 0.96358 | 0.95952 | ↓    | -0.059619  |
| P00488     | Coagulation factor XIII A chain                         | 0.59794   | 0.78049  | 0.92621 | ↓ | -0.11059   | 0.49383  | 0.891   | 1.0945  | ↑ | 0.13028    | 0.23946  | 0.85109 | 0.82342 | ↓    | -0.28029   |
| P05160     | Coagulation factor XIII B chain                         | 0.33038   | 0.6451   | 1.0833  | ↑ | 0.11549    | 0.44923  | 0.89035 | 0.92776 | ↓ | -0.10818   | 0.25302  | 0.8588  | 0.89467 | ↓    | -0.16057   |
| O00748     | Cocaine esterase                                        | 0.54192   | 0.75767  | 0.11601 | ↓ | -3.1076    | 0.46904  | 0.891   | 7.0232  | ↑ | 2.8121     | 0.28913  | 0.88847 | 0.61271 | ↓    | -0.70672   |
| E9PP50     | Cofilin, non-muscle isoform (Fragment)                  | 0.63135   | 0.79593  | 0.94    | ↓ | -0.089274  | 0.033501 | 0.537   | 0.66513 | ↓ | -0.58829   | 0.2113   | 0.84494 | 0.79118 | ↓    | -0.33792   |
| P02452     | Collagen alpha-1(I) chain                               | 0.21186   | 0.55308  | 1.1728  | ↓ | 0.22993    | 0.41197  | 0.87315 | 0.91494 | ↓ | -0.12825   | 0.31657  | 0.89152 | 0.85315 | ↓    | -0.22912   |
| P02745     | Complement C1q subcomponent subunit A                   | 0.81447   | 0.89652  | 0.96594 | ↓ | -0.049995  | 0.14484  | 0.77688 | 1.2531  | ↑ | 0.32552    | 0.71713  | 0.96358 | 1.0099  | ↑    | 0.014204   |
| A0A0A0MSV6 | Complement C1q subcomponent subunit B (Fragment)        | 0.4382    | 0.72539  | 1.1241  | ↑ | 0.16878    | 0.24191  | 0.82645 | 1.1597  | ↑ | 0.21378    | 0.17205  | 0.8186  | 1.319   | ↑    | 0.39944    |
| P02747     | Complement C1q subcomponent subunit C                   | 0.2983    | 0.63234  | 1.0351  | ↑ | 0.049734   | 0.092066 | 0.63782 | 1.6099  | ↑ | 0.68697    | 0.51409  | 0.90109 | 1.1593  | ↑    | 0.2132     |
| H0YFL7     | Complement C1r subcomponent-like protein (Fragment)     | 0.13372   | 0.46963  | 1.1964  | ↑ | 0.25875    | 0.63885  | 0.9423  | 0.97823 | ↓ | -0.031751  | 0.40535  | 0.89152 | 0.99128 | ↓    | -0.012637  |
| A0A087X232 | Complement C1s subcomponent                             | 0.24238   | 0.59045  | 1.0829  | ↑ | 0.11487    | 0.80003  | 0.96004 | 0.98676 | ↓ | -0.019226  | 0.016187 | 0.5969  | 0.78801 | ↓    | -0.34372   |
| P06681     | Complement C2                                           | 0.031898  | 0.26933  | 1.2327  | ↑ | 0.30184    | 0.34675  | 0.82645 | 0.8968  | ↓ | -0.15714   | 0.21467  | 0.84494 | 1.1342  | ↑    | 0.18169    |
| P01024     | Complement C3                                           | 0.03378   | 0.26933  | 1.1829  | ↑ | 0.24228    | 0.49343  | 0.891   | 0.94071 | ↓ | -0.088177  | 0.10591  | 0.75239 | 0.85382 | ↓    | -0.228     |
| P0C0L4     | Complement C4-A                                         | 0.0026636 | 0.087307 | 1.1914  | ↑ | 0.25269    | 0.81188  | 0.96004 | 0.99487 | ↓ | -0.0074211 | 0.10571  | 0.75239 | 0.88373 | ↓    | -0.17833   |
| P0C0L5     | Complement C4-B                                         | 0.20113   | 0.54434  | 1.1541  | ↑ | 0.20683    | 0.27147  | 0.82645 | 0.76519 | ↓ | -0.38611   | 0.75355  | 0.96358 | 0.99472 | ↓    | -0.0076444 |
| P01031     | Complement C5                                           | 0.0003645 | 0.021505 | 1.2359  | ↑ | 0.30554    | 0.078066 | 0.60604 | 0.89673 | ↓ | -0.15726   | 0.049395 | 0.75239 | 0.85001 | ↓    | -0.23444   |
| F5GY80     | Complement component 8 subunit beta                     | 0.038945  | 0.27954  | 1.1658  | ↑ | 0.22129    | 0.015641 | 0.537   | 0.82282 | ↓ | -0.28135   | 0.38071  | 0.89152 | 0.93007 | ↓    | -0.10459   |
| P13671     | Complement component C6                                 | 0.0058494 | 0.12801  | 1.2272  | ↑ | 0.29533    | 0.42886  | 0.87856 | 0.9402  | ↓ | -0.088954  | 0.015314 | 0.5969  | 0.79261 | ↓    | -0.33532   |
| P10643     | Complement component C7                                 | 0.58085   | 0.77375  | 1.0263  | ↑ | 0.037493   | 0.06344  | 0.54854 | 1.1362  | ↑ | 0.18421    | 0.89766  | 0.99807 | 0.9946  | ↓    | -0.0078143 |
| P07357     | Complement component C8 alpha chain                     | 0.99777   | 0.99777  | 0.99765 | ↓ | -0.0033883 | 0.99209  | 0.99209 | 1.0031  | ↑ | 0.0044173  | 0.16673  | 0.81079 | 1.1133  | ↑    | 0.15487    |
| P07360     | Complement component C8 gamma chain                     | 0.93192   | 0.96124  | 1.0064  | ↑ | 0.0091975  | 0.43636  | 0.88778 | 1.0604  | ↓ | 0.084641   | 0.56651  | 0.94955 | 0.94808 | ↓    | -0.07692   |
| P02748     | Complement component C9                                 | 0.089564  | 0.3887   | 1.2494  | ↑ | 0.32121    | 0.76627  | 0.96004 | 0.94713 | ↓ | -0.078369  | 0.60202  | 0.9541  | 0.9304  | ↓    | -0.10407   |
| A0A0C4DGF5 | Complement component receptor 1-like protein (Fragment) | 0.076031  | 0.36176  | 2.2279  | ↑ | 1.1557     | 0.17649  | 0.82645 | 0.60485 | ↓ | -0.72536   | 0.33199  | 0.89152 | 0.64438 | ↓    | -0.63401   |
| P08603     | Complement factor H                                     | 0.028767  | 0.25716  | 1.0935  | ↑ | 0.12889    | 0.16503  | 0.81138 | 1.0946  | ↑ | 0.13035    | 0.96444  | 0.99807 | #N/A    | #N/A |            |
| Q9BXR6     | Complement factor H-related protein 5                   | 0.007814  | 0.13356  | 1.5852  | ↑ | 0.66462    | 0.71424  | 0.94631 | 1.1556  | ↓ | 0.20863    | 0.21199  | 0.84494 | 0.79107 | ↓    | -0.33812   |
| E7ETH0     | Complement factor I                                     | 0.18609   | 0.53008  | 1.1914  | ↑ | 0.25265    | 0.85865  | 0.96004 | 0.95205 | ↓ | -0.070883  | 0.38178  | 0.89152 | 0.88126 | ↓    | -0.18237   |
| E9PDY4     | Complement receptor type 1                              | 0.82245   | 0.90078  | 0.98891 | ↓ | -0.016087  | 0.89644  | 0.96004 | 0.97967 | ↓ | -0.029632  | 0.50519  | 0.90109 | 1.1088  | ↑    | 0.14901    |
| P20023     | Complement receptor type 2                              | 0.40053   | 0.69097  | 0.71786 | ↓ | -0.47823   | 0.61764  | 0.92482 | 0.903   | ↓ | -0.14721   | 0.48906  | 0.90109 | 1.2024  | ↑    | 0.26598    |
| A0A3B3SR2  | Complement subcomponent C1r                             | 0.15307   | 0.4903   | 1.0874  | ↑ | 0.12091    | 0.4986   | 0.89143 | 1.037   | ↑ | 0.0524     | 0.82253  | 0.97841 | 1.0124  | ↑    | 0.017709   |
| B4E3S0     | Coronin                                                 | 0.25019   | 0.59045  | 0.83874 | ↓ | -0.2537    | 0.096978 | 0.63782 | 1.3741  | ↑ | 0.4585     | 0.68213  | 0.96358 | 1.0936  | ↑    | 0.1291     |
| P31146     | Coronin-1A                                              | 0.50029   | 0.74044  | 0.95372 | ↓ | -0.068364  | 0.20893  | 0.82645 | 1.1355  | ↑ | 0.18328    | 0.14438  | 0.78429 | 1.1145  | ↑    | 0.15638    |
| P08185     | Corticosteroid-binding globulin                         | 0.35477   | 0.6451   | 1.1805  | ↑ | 0.23939    | 0.28051  | 0.82645 | 0.56077 | ↓ | -0.83451   | 0.25618  | 0.8588  | 0.57513 | ↓    | -0.79803   |
| P02741     | C-reactive protein                                      | 0.0060752 | 0.12801  | 1.6386  | ↑ | 0.7125     | 0.1153   | 0.68025 | 0.74102 | ↓ | -0.43243   | 0.72167  | 0.96358 | 1.3208  | ↑    | 0.4014     |
| P01034     | Cystatin-C                                              | 0.1542    | 0.4903   | 1.1337  | ↑ | 0.18105    | 0.94216  | 0.98211 | 1.0179  | ↑ | 0.025586   | 0.93176  | 0.99807 | 1.0019  | ↑    | 0.0027823  |
| P32320     | Cytidine deaminase                                      | 0.49585   | 0.73876  | 1.0383  | ↑ | 0.054228   | 0.98675  | 0.99209 | 1.1795  | ↑ | 0.23822    | 0.61753  | 0.9541  | 1.1886  | ↑    | 0.24924    |
| P81605     | Dermcidin                                               | 0.30383   | 0.63234  | 1.234   | ↑ | 0.30338    | 0.61929  | 0.92482 | 0.80523 | ↓ | -0.31253   | 0.88977  | 0.99807 | 1.086   | ↑    | 0.119      |

|            |                                                                  |                  |          |         |   |           |                 |         |          |   |            |                  |         |         |   |           |
|------------|------------------------------------------------------------------|------------------|----------|---------|---|-----------|-----------------|---------|----------|---|------------|------------------|---------|---------|---|-----------|
| Q02413     | Desmoglein-1                                                     | 0.23346          | 0.59045  | 0.72632 | ↓ | -0.46131  | 0.0505          | 0.537   | 1.291    | ↑ | 0.36851    | 0.69973          | 0.96358 | 1.0918  | ↑ | 0.12674   |
| Q9UHL4     | Dipeptidyl peptidase 2                                           | 0.40905          | 0.69869  | 1.1372  | ↑ | 0.18548   | 0.68138         | 0.94631 | 0.9428   | ↓ | -0.084973  | 0.21599          | 0.84494 | 0.72976 | ↓ | -0.4545   |
| E5RIA2     | Ectonucleotide pyrophosphatase/phosphodiesterase family member 2 | 0.91379          | 0.95424  | 0.96481 | ↓ | -0.051676 | 0.77933         | 0.96004 | 1.0582   | ↓ | 0.081627   | <b>0.028216</b>  | 0.61501 | 0.76658 | ↓ | -0.3835   |
| Q12805     | EGF-containing fibulin-like extracellular matrix protein 1       | 0.5328           | 0.75468  | 1.1552  | ↑ | 0.20814   | 0.54877         | 0.90291 | 0.72586  | ↓ | -0.46223   | 0.90779          | 0.99807 | 1.0468  | ↑ | 0.066014  |
| A0A0U1RQQ4 | Endothelial protein C receptor (Fragment)                        | 0.3481           | 0.6451   | 0.80752 | ↓ | -0.30844  | 0.29055         | 0.82645 | 1.1142   | ↑ | 0.15599    | 0.83101          | 0.97906 | 0.9608  | ↓ | -0.057697 |
| O75715     | Epididymal secretory glutathione peroxidase                      | <b>0.038656</b>  | 0.27954  | 1.4054  | ↑ | 0.49101   | 0.33161         | 0.82645 | 0.92877  | ↓ | -0.10661   | 0.080806         | 0.75239 | 0.52103 | ↓ | -0.94057  |
| Q9UBQ6     | Exostosin-like 2                                                 | 0.89859          | 0.94673  | 0.96004 | ↓ | -0.14236  | 0.58737         | 0.9168  | 1.0524   | ↑ | 0.073651   | 0.071995         | 0.75239 | 1.6689  | ↑ | 0.73888   |
| Q16610     | Extracellular matrix protein 1                                   | 0.64025          | 0.80031  | 0.94361 | ↓ | -0.083744 | 0.20965         | 0.82645 | 1.1554   | ↑ | 0.20841    | 0.31443          | 0.89152 | 0.89952 | ↓ | -0.15277  |
| P08294     | Extracellular superoxide dismutase [Cu-Zn]                       | 0.31942          | 0.63667  | 1.0958  | ↑ | 0.132     | 0.38592         | 0.84961 | 1.1707   | ↑ | 0.22736    | 0.79496          | 0.96907 | 1.0435  | ↑ | 0.061483  |
| Q86UX7     | Fermitin family homolog 3                                        | 0.18146          | 0.53008  | 1.1923  | ↑ | 0.2537    | 0.05586         | 0.537   | 0.75961  | ↓ | -0.39667   | 0.23054          | 0.84494 | 0.83644 | ↓ | -0.25766  |
| C9JC68     | Fetuin-B (Fragment)                                              | 0.089079         | 0.3887   | 0.59296 | ↓ | -0.75399  | <b>0.042268</b> | 0.537   | 1.7505   | ↓ | 0.80774    | 0.2265           | 0.84494 | 1.4763  | ↑ | 0.56194   |
| P02671     | Fibrinogen alpha chain                                           | <b>0.045163</b>  | 0.29387  | 1.11    | ↑ | 0.1506    | 0.20859         | 0.82645 | 0.92245  | ↓ | -0.11645   | 0.55451          | 0.94011 | 0.96347 | ↓ | -0.053683 |
| P02675     | Fibrinogen beta chain                                            | 0.057098         | 0.3177   | 1.2122  | ↑ | 0.27759   | 0.65671         | 0.94631 | 1.291    | ↓ | 0.36852    | <b>0.021624</b>  | 0.61501 | 0.73556 | ↓ | -0.44309  |
| C9JC84     | Fibrinogen gamma chain                                           | 0.29795          | 0.63234  | 1.1398  | ↑ | 0.18872   | 0.72099         | 0.94631 | 0.94462  | ↓ | -0.082194  | 0.089448         | 0.75239 | 0.77622 | ↓ | -0.36546  |
| P02751     | Fibronectin                                                      | 0.056764         | 0.3177   | 0.72304 | ↓ | -0.46785  | 0.41585         | 0.87315 | 1.0752   | ↑ | 0.10461    | 0.38924          | 0.89152 | 1.0964  | ↑ | 0.13284   |
| H0Y4K8     | Fibronectin (Fragment)                                           | 0.46879          | 0.72539  | 0.80375 | ↓ | -0.31517  | 0.22419         | 0.82645 | 0.79032  | ↓ | -0.33949   | 0.96875          | 0.99807 | 1.0292  | ↑ | 0.04154   |
| P23142     | Fibulin-1                                                        | 0.18154          | 0.53008  | 0.85935 | ↓ | -0.21869  | 0.36841         | 0.82645 | 1.1499   | ↑ | 0.20152    | <b>0.038856</b>  | 0.74143 | 1.2115  | ↑ | 0.27674   |
| A0A087WVE2 | Ficolin-1                                                        | 0.70422          | 0.83768  | 0.668   | ↓ | -0.58207  | 0.98595         | 0.99209 | 0.89235  | ↓ | -0.16432   | 0.33059          | 0.89152 | 4.2878  | ↑ | 2.1002    |
| Q15485     | Ficolin-2                                                        | 0.47782          | 0.72539  | 1.4103  | ↑ | 0.49597   | 0.42639         | 0.87856 | 0.67734  | ↓ | -0.56205   | 0.89467          | 0.99807 | 1.08    | ↑ | 1.11105   |
| O75636     | Ficolin-3                                                        | 0.47657          | 0.72539  | 1.2633  | ↑ | 0.33718   | 0.17479         | 0.82645 | 0.48553  | ↓ | -1.0424    | 0.47317          | 0.90109 | 0.65847 | ↓ | -0.60281  |
| P21333     | Filamin-A                                                        | 0.15446          | 0.4903   | 1.1866  | ↑ | 0.24682   | 0.53215         | 0.89861 | 0.92406  | ↓ | -0.11394   | 0.29714          | 0.89152 | 0.87554 | ↓ | -0.19175  |
| P04075     | Fructose-bisphosphate aldolase A                                 | 0.054355         | 0.3177   | 1.1599  | ↑ | 0.21404   | 0.45876         | 0.89035 | 1.1033   | ↑ | 0.14179    | <b>0.022409</b>  | 0.61501 | 0.82635 | ↓ | -0.27518  |
| P09972     | Fructose-bisphosphate aldolase C                                 | <b>0.012697</b>  | 0.15675  | 1.9594  | ↑ | 0.97038   | 0.74721         | 0.96004 | 0.99502  | ↓ | -0.0071971 | 0.58786          | 0.95166 | 0.89802 | ↓ | -0.15518  |
| Q08380     | Galectin-3-binding protein                                       | 0.058671         | 0.3177   | 0.83134 | ↓ | -0.26648  | 0.05197         | 0.537   | 1.2561   | ↑ | 0.32896    | 0.31365          | 0.89152 | 1.1256  | ↑ | 0.1707    |
| D6RF35     | Gc-globulin                                                      | 0.61119          | 0.78415  | 0.97446 | ↓ | -0.037326 | 0.48872         | 0.891   | 1.0565   | ↑ | 0.079314   | 0.095195         | 0.75239 | 1.0888  | ↑ | 0.1228    |
| P06396     | Gelsolin                                                         | 0.33993          | 0.6451   | 1.0559  | ↑ | 0.078459  | 1.03314         | 0.74108 | 0.88817  | ↓ | -0.17109   | 0.7379           | 0.96358 | 0.97643 | ↓ | -0.034415 |
| MOQX47     | Glia maturation factor gamma                                     | 0.10653          | 0.40291  | 1.1999  | ↑ | 0.26291   | 0.35485         | 0.82645 | 0.89622  | ↓ | -0.15808   | 0.64038          | 0.9541  | 1.0713  | ↑ | 0.099343  |
| A0A2R8Y7X9 | GLOBIN domain-containing protein                                 | 0.46661          | 0.72539  | 0.97899 | ↓ | -0.030635 | 0.53612         | 0.89861 | 2.3746   | ↑ | 1.2477     | 0.84272          | 0.97906 | 0.9088  | ↓ | -0.13797  |
| A0A0J9YXP8 | Glucose-6-phosphate isomerase (Fragment)                         | 0.51436          | 0.74381  | 1.1193  | ↑ | 0.16258   | 0.36353         | 0.82645 | 1.2089   | ↑ | 0.27365    | 0.18241          | 0.84079 | 0.77777 | ↓ | -0.36258  |
| A0A087X1J7 | Glutathione peroxidase                                           | <b>0.012136</b>  | 0.15675  | 2.0726  | ↑ | 1.0515    | 0.85758         | 0.96004 | 1.272    | ↑ | 0.34708    | 0.53548          | 0.9131  | 0.94656 | ↓ | -0.079231 |
| P09211     | Glutathione S-transferase P                                      | 0.24186          | 0.59045  | 1.4862  | ↑ | 0.57162   | 0.84693         | 0.96004 | 0.96163  | ↓ | -0.056452  | 0.46748          | 0.90109 | 0.77283 | ↓ | -0.37177  |
| E7EUT5     | Glyceraldehyde-3-phosphate dehydrogenase                         | 0.97932          | 0.98486  | 0.90517 | ↓ | -0.14374  | 0.78112         | 0.96004 | 0.98689  | ↓ | -0.019041  | 0.81034          | 0.97198 | 0.86274 | ↓ | -0.21301  |
| A0A0C4DGZ8 | Glycoprotein Ib (Platelet), alpha polypeptide                    | 0.60893          | 0.78415  | 0.8984  | ↓ | -0.15457  | 0.2657          | 0.82645 | 1.5132   | ↑ | 0.59759    | 0.064901         | 0.75239 | 1.3075  | ↑ | 0.38679   |
| P00738     | Haptoglobin                                                      | <b>0.0015645</b> | 0.065932 | 2.4113  | ↑ | 1.2698    | 0.9843          | 0.99209 | 1.1498   | ↑ | 0.20138    | 0.97295          | 0.99807 | 1.051   | ↑ | 0.071818  |
| P00739     | Haptoglobin-related protein                                      | 0.31227          | 0.63417  | 49.291  | ↑ | 5.6232    | 0.31679         | 0.82645 | 0.020057 | ↓ | -5.6398    | 0.75494          | 0.96358 | 0.98765 | ↓ | -0.01793  |
| G3V1N2     | HCG1745306, isoform CRA_a                                        | 0.87409          | 0.93426  | 0.9421  | ↓ | -0.086055 | 0.72497         | 0.94631 | 1.408    | ↑ | 0.49366    | 0.75071          | 0.96358 | 1.2437  | ↑ | 0.31467   |
| E9PKE3     | Heat shock cognate 71 kDa protein                                | 0.76514          | 0.87149  | 1.0394  | ↑ | 0.055757  | 0.67782         | 0.94631 | 1.0394   | ↑ | 0.055683   | 0.11573          | 0.77593 | 0.82538 | ↓ | -0.27688  |
| P69905     | Hemoglobin subunit alpha                                         | 0.82445          | 0.90078  | 0.9062  | ↓ | -0.1421   | <b>0.020076</b> | 0.537   | 1.3722   | ↑ | 0.45654    | 0.95326          | 0.99807 | 1.0492  | ↑ | 0.069285  |
| P68871     | Hemoglobin subunit beta                                          | 0.53456          | 0.75468  | 0.78029 | ↓ | -0.35791  | 0.13577         | 0.7417  | 1.5083   | ↑ | 0.59288    | 0.75482          | 0.96358 | 0.96712 | ↓ | -0.048234 |
| P02042     | Hemoglobin subunit delta                                         | 0.58489          | 0.77375  | 0.71604 | ↓ | -0.4819   | 0.073367        | 0.58496 | 1.6686   | ↑ | 0.73862    | 0.098227         | 0.75239 | 2.3238  | ↑ | 1.2165    |
| P02790     | Hemopexin                                                        | <b>0.0019203</b> | 0.070812 | 1.5414  | ↑ | 0.62423   | 0.052006        | 0.537   | 0.7772   | ↓ | -0.36365   | 0.22078          | 0.84494 | 0.85487 | ↓ | -0.22622  |
| P05546     | Heparin cofactor 2                                               | 0.56617          | 0.77375  | 1.0722  | ↑ | 0.10058   | 0.6995          | 0.94631 | 1.0283   | ↑ | 0.040248   | 0.97439          | 0.99807 | 0.98707 | ↓ | -0.018772 |
| Q04756     | Hepatocyte growth factor activator                               | 0.48162          | 0.72539  | 1.0554  | ↑ | 0.077758  | 0.71107         | 0.94631 | 1.0429   | ↑ | 0.060541   | 0.2964           | 0.84079 | 1.1069  | ↑ | 0.14658   |
| G3XAK1     | Hepatocyte growth factor-like protein                            | 0.12642          | 0.44931  | 1.1652  | ↑ | 0.22054   | 0.16131         | 0.80675 | 0.83902  | ↓ | -0.25323   | <b>0.0042263</b> | 0.41558 | 0.70118 | ↓ | -0.51214  |
| P04196     | Histidine-rich glycoprotein                                      | 0.075273         | 0.36176  | 0.7864  | ↓ | -0.34667  | 0.82481         | 0.96004 | 1.0361   | ↑ | 0.051163   | 0.77207          | 0.96358 | 0.94035 | ↓ | -0.088734 |
| Q14520     | Hyaluronan-binding protein 2                                     | 0.48195          | 0.72539  | 1.0263  | ↑ | 0.037409  | 0.54019         | 0.90031 | 1.0674   | ↑ | 0.094072   | 0.24948          | 0.8588  | 0.93336 | ↓ | -0.099488 |
| A0A087WXI2 | IgGfC-binding protein                                            | 0.92472          | 0.95717  | 0.96933 | ↓ | -0.044939 | 0.74223         | 0.96004 | 1.03     | ↑ | 0.042702   | 0.81043          | 0.97198 | 0.99081 | ↓ | -0.013326 |
| A0A0G2JMB2 | Immunoglobulin heavy constant alpha 2 (Fragment)                 | 0.31386          | 0.63417  | 0.57566 | ↓ | -0.79672  | 0.56645         | 0.90291 | 1.1886   | ↑ | 0.2492     | 0.45051          | 0.90109 | 1.8395  | ↑ | 0.87933   |
| P01871     | Immunoglobulin heavy constant mu                                 | 0.62948          | 0.79593  | 0.92894 | ↓ | -0.10634  | 0.76991         | 0.96004 | 0.95489  | ↓ | -0.066586  | 0.66681          | 0.95952 | 0.92972 | ↓ | -0.10513  |
| A0A0B4J2H0 | Immunoglobulin heavy variable 1-69D                              | 0.78018          | 0.87845  | 0.95394 | ↓ | -0.068032 | <b>0.027925</b> | 0.537   | 1.3974   | ↑ | 0.48277    | 0.77834          | 0.96358 | 0.93921 | ↓ | -0.090482 |
| A0A075B7D8 | Immunoglobulin heavy variable 3/OR15-7 (pseudogene) (Fragment)   | 0.14251          | 0.48884  | 0.7205  | ↓ | -0.47292  | 0.097294        | 0.63782 | 2.1795   | ↑ | 1.124      | 0.75692          | 0.96358 | 1.2719  | ↑ | 0.34699   |
| A0A4W8ZXM2 | Immunoglobulin heavy variable 3-72                               | 0.051077         | 0.30751  | 0.6558  | ↓ | -0.60866  | 0.17655         | 0.82645 | 1.3807   | ↑ | 0.46535    | 0.28666          | 0.88847 | 1.3046  | ↑ | 0.38356   |
| A0A075B6R2 | Immunoglobulin heavy variable 4-4                                | 0.35186          | 0.6451   | 1.4669  | ↑ | 0.5528    | 0.70397         | 0.94631 | 0.71444  | ↓ | -0.48512   | 0.49993          | 0.90109 | 0.70345 | ↓ | -0.50749  |
| D6RD17     | Immunoglobulin J chain (Fragment)                                | 0.73403          | 0.85589  | 1.0411  | ↑ | 0.058066  | 0.36538         | 0.82645 | 1.543    | ↑ | 0.62575    | 0.97724          | 0.99807 | 1.2051  | ↑ | 0.2692    |
| A0ASH1ZRQ3 | Immunoglobulin kappa constant (Fragment)                         | 0.97625          | 0.98486  | 1.4379  | ↑ | 0.52399   | 0.71925         | 0.94631 | 1.1149   | ↑ | 0.15697    | 0.59035          | 0.95166 | 1.3233  | ↑ | 0.40412   |
| A0A075B6P5 | Immunoglobulin kappa variable 2-28                               | 0.56335          | 0.77375  | 0.71172 | ↓ | -0.49062  | 0.32922         | 0.82645 | 1.8665   | ↑ | 0.90031    | 0.74463          | 0.96358 | 0.89327 | ↓ | -0.16283  |
| P0CF74     | Immunoglobulin lambda constant 6                                 | 0.33246          | 0.6451   | 1.1241  | ↑ | 0.1688    | 0.83553         | 0.96004 | 1.0564   | ↑ | 0.079088   | 0.99546          | 0.99807 | 1.1686  | ↑ | 0.2248    |
| A0A075B6K5 | Immunoglobulin lambda variable 3-9                               | 0.77175          | 0.87228  | 1.0583  | ↑ | 0.081803  | 0.83606         | 0.96004 | 0.98609  | ↓ | -0.020206  | 0.42873          | 0.89152 | 0.83907 | ↓ | -0.25314  |
| P15814     | Immunoglobulin lambda-like polypeptide 1                         | 0.75007          | 0.85952  | 1.0473  | ↑ | 0.066713  | 0.56113         | 0.90291 | 1.0587   | ↑ | 0.082341   | 0.80208          | 0.97198 | 0.83137 | ↓ | -0.26644  |



|            |                                                                        |            |          |         |   |            |          |         |         |   |            |            |         |         |   |            |
|------------|------------------------------------------------------------------------|------------|----------|---------|---|------------|----------|---------|---------|---|------------|------------|---------|---------|---|------------|
| P05019     | Insulin-like growth factor I                                           | 0.12234    | 0.44555  | 1.1797  | ↑ | 0.23846    | 0.74351  | 0.96004 | 0.94989 | ↓ | -0.074162  | 0.25405    | 0.8588  | 0.86499 | ↓ | -0.20924   |
| P01344     | Insulin-like growth factor II                                          | 0.27652    | 0.61334  | 1.3494  | ↑ | 0.43232    | 0.31458  | 0.82645 | 0.74216 | ↓ | -0.43019   | 0.39722    | 0.89152 | 0.76668 | ↓ | -0.38331   |
| P18065     | Insulin-like growth factor-binding protein 2                           | 0.4613     | 0.72539  | 1.1173  | ↑ | 0.16006    | 0.85626  | 0.96004 | 1.0106  | ↑ | 0.015244   | 0.39922    | 0.89152 | 0.80506 | ↓ | -0.31284   |
| A6XND0     | Insulin-like growth factor-binding protein 3                           | 0.0051927  | 0.12765  | 1.1966  | ↑ | 0.25895    | 0.085897 | 0.63494 | 0.88712 | ↓ | -0.1728    | 0.77712    | 0.96358 | 1.0123  | ↑ | 0.017612   |
| A0A3B3IUE0 | Insulin-like growth factor-binding protein 6                           | 0.56939    | 0.77375  | 1.1084  | ↑ | 0.14842    | 0.7665   | 0.96004 | 1.0236  | ↓ | 0.033685   | 0.86691    | 0.98927 | 0.98862 | ↓ | -0.016509  |
| P35858     | Insulin-like growth factor-binding protein complex acid labile subunit | 0.66331    | 0.82217  | 0.99472 | ↓ | -0.0076379 | 0.088246 | 0.63494 | 0.86269 | ↓ | -0.21309   | 0.63805    | 0.9541  | 0.97568 | ↓ | -0.035519  |
| P19827     | Inter-alpha-trypsin inhibitor heavy chain H1                           | 0.47929    | 0.72539  | 0.9475  | ↓ | -0.077796  | 0.60348  | 0.92014 | 0.95783 | ↓ | -0.062159  | 0.4302     | 0.89152 | 0.93706 | ↓ | -0.093785  |
| P19823     | Inter-alpha-trypsin inhibitor heavy chain H2                           | 0.43661    | 0.72539  | 0.94719 | ↓ | -0.078275  | 0.88597  | 0.96004 | 1.0007  | ↑ | 0.0010626  | 0.38444    | 0.89152 | 1.0598  | ↑ | 0.083776   |
| A0A087WW43 | Inter-alpha-trypsin inhibitor heavy chain H3                           | 0.037315   | 0.27954  | 1.166   | ↑ | 0.22162    | 0.45377  | 0.89035 | 0.93895 | ↓ | -0.090877  | 0.87664    | 0.99465 | 1.0036  | ↑ | 0.0052127  |
| Q9NPH3     | Interleukin-1 receptor accessory protein                               | 0.10125    | 0.40261  | 0.74621 | ↓ | -0.42235   | 0.27085  | 0.82645 | 1.1385  | ↑ | 0.18717    | 0.040213   | 0.74143 | 1.3954  | ↑ | 0.48066    |
| P27930     | Interleukin-1 receptor type 2                                          | 0.57709    | 0.77375  | 1.1109  | ↑ | 0.15179    | 0.79787  | 0.96004 | 0.98254 | ↓ | -0.025412  | 0.67203    | 0.95952 | 0.86591 | ↓ | -0.20771   |
| B7ZKJ8     | ITIH4 protein                                                          | 0.00043899 | 0.021583 | 1.3549  | ↑ | 0.43821    | 0.053916 | 0.537   | 0.85024 | ↓ | -0.23406   | 0.27446    | 0.87225 | 0.91928 | ↓ | -0.12142   |
| P29622     | Kallistatin                                                            | 0.024421   | 0.2324   | 1.2927  | ↑ | 0.37038    | 0.25743  | 0.82645 | 0.86145 | ↓ | -0.21516   | 0.00086068 | 0.22255 | 0.60773 | ↓ | -0.7185    |
| A0A1B0GVI3 | Keratin, type I cytoskeletal 10                                        | 0.37499    | 0.6644   | 0.84528 | ↓ | -0.2425    | 0.10522  | 0.6604  | 0.86909 | ↓ | -0.20242   | 0.72612    | 0.96358 | 0.98007 | ↓ | -0.029041  |
| P08779     | Keratin, type I cytoskeletal 16                                        | 0.73779    | 0.85688  | 0.85476 | ↓ | -0.22641   | 0.017897 | 0.537   | 0.86492 | ↓ | -0.20936   | 0.67242    | 0.95952 | 0.97583 | ↓ | -0.035292  |
| P35527     | Keratin, type I cytoskeletal 9                                         | 0.52112    | 0.74798  | 0.46723 | ↓ | -1.0978    | 0.22955  | 0.82645 | 0.9057  | ↓ | -0.14289   | 0.38765    | 0.89152 | 0.92497 | ↓ | -0.11252   |
| P04264     | Keratin, type II cytoskeletal 1                                        | 0.16874    | 0.50282  | 0.47061 | ↓ | -1.0874    | 0.69825  | 0.94631 | 0.95551 | ↓ | -0.065655  | 0.44123    | 0.89152 | 0.92003 | ↓ | -0.12025   |
| P35908     | Keratin, type II cytoskeletal 2 epidermal                              | 0.61669    | 0.78415  | 0.91106 | ↓ | -0.13439   | 0.35707  | 0.82645 | 0.91968 | ↓ | -0.12079   | 0.97722    | 0.99807 | 0.99653 | ↓ | -0.0050199 |
| P13647     | Keratin, type II cytoskeletal 5                                        | 0.19976    | 0.54434  | 0.81757 | ↓ | -0.29059   | 0.30603  | 0.82645 | 1.0832  | ↑ | 0.11525    | 0.72314    | 0.96358 | 0.97608 | ↓ | -0.034933  |
| P02538     | Keratin, type II cytoskeletal 6A                                       | 0.033099   | 0.26933  | 0.8249  | ↓ | -0.27771   | 0.98039  | 0.99209 | 0.99319 | ↓ | -0.0098579 | 0.15785    | 0.81079 | 1.1021  | ↑ | 0.14031    |
| P04259     | Keratin, type II cytoskeletal 6B                                       | 0.61454    | 0.78415  | 1.066   | ↑ | 0.092261   | 0.8683   | 0.96004 | 1.042   | ↑ | 0.059419   | 0.069484   | 0.75239 | 0.71872 | ↓ | -0.4765    |
| P01042     | Kininogen-1                                                            | 0.10165    | 0.40261  | 1.1538  | ↑ | 0.2064     | 0.66026  | 0.94631 | 1.073   | ↑ | 0.038807   | 0.16353    | 0.81079 | 0.87471 | ↓ | -0.19313   |
| E7EQB2     | Lactotransferrin (Fragment)                                            | 0.47207    | 0.72539  | 0.83175 | ↓ | -0.26578   | 0.79587  | 0.96004 | 0.88095 | ↓ | -0.18286   | 0.24623    | 0.8588  | 1.1896  | ↑ | 0.25046    |
| C9JD84     | Latent-transforming growth factor beta-binding protein 1               | 0.98152    | 0.98486  | 0.99102 | ↓ | -0.013012  | 0.66921  | 0.94631 | 1.0309  | ↑ | 0.0439     | 0.58902    | 0.95166 | 1.0424  | ↑ | 0.05985    |
| P02750     | Leucine-rich alpha-2-glycoprotein                                      | 0.021012   | 0.2117   | 1.3339  | ↑ | 0.41564    | 0.86152  | 0.96004 | 0.96186 | ↓ | -0.056097  | 0.22923    | 0.84494 | 0.84556 | ↓ | -0.24202   |
| A0A3B3IS95 | L-lactate dehydrogenase                                                | 0.039799   | 0.27954  | 1.4771  | ↑ | 0.56275    | 0.84618  | 0.96004 | 0.96404 | ↓ | -0.052828  | 0.42613    | 0.89152 | 1.3856  | ↑ | 0.47056    |
| C9JC71     | Low affinity immunoglobulin gamma Fc region receptor III-A (Fragment)  | 0.13671    | 0.47448  | 2.2169  | ↑ | 1.1486     | 0.75035  | 0.96004 | 1.4087  | ↑ | 0.49433    | 0.73027    | 0.96358 | 3.3503  | ↑ | 1.7443     |
| P51884     | Lumican                                                                | 0.52232    | 0.74798  | 0.95396 | ↓ | -0.068006  | 0.85971  | 0.96004 | 1.0075  | ↑ | 0.01084    | 0.232      | 0.84494 | 1.0971  | ↑ | 0.13366    |
| E9PEK4     | Macrophage colony-stimulating factor 1 receptor                        | 0.23454    | 0.59045  | 0.59592 | ↓ | -0.74682   | 0.89313  | 0.96004 | 1.007   | ↑ | 0.010021   | 0.58637    | 0.95166 | 1.4075  | ↑ | 0.49315    |
| P48740     | Mannan-binding lectin serine protease 1                                | 0.074582   | 0.36176  | 1.0914  | ↑ | 0.12616    | 0.57235  | 0.90291 | 0.96782 | ↓ | -0.047183  | 0.27794    | 0.87225 | 0.92196 | ↓ | -0.11722   |
| O00187     | Mannan-binding lectin serine protease 2                                | 0.20461    | 0.54722  | 1.1172  | ↑ | 0.15983    | 0.65992  | 0.94631 | 0.9606  | ↓ | -0.057998  | 0.85687    | 0.98356 | 1.0057  | ↑ | 0.0082129  |
| P33908     | Mannosyl-oligosaccharide 1,2-alpha-mannosidase IA                      | 0.32825    | 0.6451   | 1.2381  | ↑ | 0.3081     | 0.41062  | 0.87315 | 0.81646 | ↓ | -0.29255   | 0.51558    | 0.90109 | 0.86294 | ↓ | -0.21268   |
| Q16853     | Membrane primary amine oxidase                                         | 0.042048   | 0.28847  | 0.7737  | ↓ | -0.37016   | 0.78802  | 0.96004 | 1.0486  | ↑ | 0.068443   | 0.74686    | 0.96358 | 0.96281 | ↓ | -0.05467   |
| P08571     | Monocyte differentiation antigen CD14                                  | 0.42182    | 0.71107  | 1.0858  | ↑ | 0.11877    | 0.31112  | 0.82645 | 1.0852  | ↑ | 0.11797    | 0.6578     | 0.95952 | 1.0436  | ↑ | 0.061627   |
| P03971     | Muellerian-inhibiting factor                                           | 0.16708    | 0.50282  | 0.8415  | ↓ | -0.24896   | 0.95089  | 0.98426 | 1.0129  | ↓ | 0.018528   | 0.3502     | 0.89152 | 0.90054 | ↓ | -0.15113   |
| Q7Z7M0     | Multiple epidermal growth factor-like domains protein 8                | 0.26589    | 0.6104   | 1.1134  | ↑ | 0.15492    | 0.69975  | 0.94631 | 0.95238 | ↓ | -0.070386  | 0.88769    | 0.99807 | 1.0115  | ↑ | 0.01652    |
| P05164     | Myeloperoxidase                                                        | 0.059288   | 0.3177   | 1.504   | ↑ | 0.58883    | 0.61015  | 0.92305 | 0.91751 | ↓ | -0.1242    | 0.6022     | 0.9541  | 1.071   | ↑ | 0.098982   |
| F8W1R7     | Myosin light polypeptide 6                                             | 0.84468    | 0.90942  | 1.0106  | ↑ | 0.015259   | 0.12895  | 0.74108 | 1.1879  | ↑ | 0.24844    | 0.3207     | 0.89152 | 0.87483 | ↓ | -0.19293   |
| P12882     | Myosin-1                                                               | 0.010512   | 0.15675  | 1.7944  | ↑ | 0.84347    | 0.031776 | 0.537   | 0.61588 | ↓ | -0.69929   | 0.014745   | 0.5969  | 0.57177 | ↓ | -0.8065    |
| P35579     | Myosin-9                                                               | 0.74792    | 0.85952  | 0.98134 | ↓ | -0.027179  | 0.52724  | 0.89861 | 1.0344  | ↑ | 0.048764   | 0.43245    | 0.89152 | 0.93695 | ↓ | -0.093953  |
| Q96PD5     | N-acetylmuramoyl-L-alanine amidase                                     | 0.83832    | 0.90588  | 0.91421 | ↓ | -0.1294    | 0.28917  | 0.82645 | 1.2602  | ↑ | 0.33369    | 0.3202     | 0.89152 | 0.89429 | ↓ | -0.16118   |
| Q15223     | Nectin-1                                                               | 0.47319    | 0.72539  | 1.5019  | ↑ | 0.58681    | 0.058251 | 0.537   | 0.43727 | ↓ | -1.1934    | 0.4369     | 0.89152 | 0.64312 | ↓ | -0.63684   |
| A0A087WTE4 | Neural cell adhesion molecule 1                                        | 0.45735    | 0.72539  | 1.1048  | ↑ | 0.14378    | 0.21337  | 0.82645 | 0.84072 | ↓ | -0.25031   | 0.47781    | 0.90109 | 0.89982 | ↓ | -0.15229   |
| A0A087X0M8 | Neural cell adhesion molecule L1-like protein                          | 0.97419    | 0.98486  | 0.95234 | ↓ | -0.070453  | 0.86021  | 0.96004 | 0.97214 | ↓ | -0.040766  | 0.95922    | 0.99807 | 0.99145 | ↓ | -0.012386  |
| P04746     | Pancreatic alpha-amylase                                               | 0.048616   | 0.29878  | 1.2685  | ↑ | 0.34316    | 0.3063   | 0.82645 | 0.8696  | ↓ | -0.20157   | 0.27702    | 0.87225 | 0.85843 | ↓ | -0.22023   |
| O95497     | Pantetheinase                                                          | 0.89389    | 0.94585  | 0.97974 | ↓ | -0.02953   | 0.27453  | 0.82645 | 1.2306  | ↑ | 0.2994     | 0.14622    | 0.78429 | 0.85005 | ↓ | -0.23438   |
| A0A1B0GU03 | Peptidase A1 domain-containing protein                                 | 0.30438    | 0.63234  | 1.2445  | ↑ | 0.31556    | 0.49118  | 0.891   | 0.87774 | ↓ | -0.18813   | 0.63057    | 0.9541  | 1.1656  | ↑ | 0.22107    |
| P62937     | Peptidyl-prolyl cis-trans isomerase A                                  | 0.69345    | 0.83768  | 1.1699  | ↑ | 0.22642    | 0.95901  | 0.98627 | 0.98002 | ↓ | -0.029121  | 0.41232    | 0.89152 | 0.74489 | ↓ | -0.42491   |
| B1ALD9     | Periostin                                                              | 0.61355    | 0.78415  | 1.0726  | ↑ | 0.10113    | 0.8537   | 0.96004 | 1.0059  | ↓ | 0.0084364  | 0.10904    | 0.75239 | 0.79988 | ↓ | -0.32214   |
| A0A0A0MRQ5 | Peroxisomal protein 1                                                  | 0.3411     | 0.6451   | 0.88897 | ↓ | -0.16979   | 0.3077   | 0.82645 | 1.5235  | ↑ | 0.60737    | 0.13551    | 0.78429 | 0.85077 | ↓ | -0.23316   |
| P32119     | Peroxisomal protein 2                                                  | 0.56447    | 0.77375  | 0.9482  | ↓ | -0.076736  | 0.4443   | 0.89035 | 0.89809 | ↓ | -0.15507   | 0.84298    | 0.97906 | 1.0608  | ↑ | 0.085085   |
| P30041     | Peroxisomal protein 6                                                  | 0.23823    | 0.59045  | 1.6638  | ↑ | 0.73452    | 0.59771  | 0.92014 | 0.89094 | ↓ | -0.1666    | 0.10246    | 0.75239 | 0.51082 | ↓ | -0.9691    |
| P04180     | Phosphatidylcholine-sterol acyltransferase                             | 0.27053    | 0.6104   | 0.86058 | ↓ | -0.21662   | 0.9002   | 0.96004 | 0.97774 | ↓ | -0.032474  | 0.50043    | 0.90109 | 1.0974  | ↑ | 0.13409    |
| P80108     | Phosphatidylinositol-glycan-specific phospholipase D                   | 0.15374    | 0.4903   | 0.87534 | ↓ | -0.19208   | 0.049097 | 0.537   | 1.1607  | ↑ | 0.21496    | 0.85015    | 0.98205 | 1.025   | ↑ | 0.035674   |
| P18669     | Phosphoglycerate mutase 1                                              | 0.045824   | 0.29387  | 1.956   | ↑ | 0.96789    | 0.81849  | 0.96004 | 0.93104 | ↓ | -0.10308   | 0.3742     | 0.89152 | 0.74308 | ↓ | -0.42841   |
| P55058     | Phospholipid transfer protein                                          | 0.69319    | 0.83768  | 1.0752  | ↑ | 0.10456    | 0.93954  | 0.98211 | 0.9669  | ↓ | -0.048563  | 0.71465    | 0.96358 | 1.0616  | ↑ | 0.086252   |
| P36955     | Pigment epithelium-derived factor                                      | 0.16098    | 0.49335  | 0.90337 | ↓ | -0.14661   | 0.36082  | 0.82645 | 1.0844  | ↑ | 0.11693    | 0.99807    | 0.99688 | 0.99688 | ↓ | -0.0045151 |
| H0YAC1     | Plasma kallikrein (Fragment)                                           | 0.30756    | 0.63417  | 0.95529 | ↓ | -0.065991  | 0.60511  | 0.92014 | 1.0348  | ↓ | 0.049377   | 0.30173    | 0.89152 | 1.0862  | ↑ | 0.11923    |
| A0A7I2V2D2 | Plasma protease C1 inhibitor                                           | 0.37612    | 0.6644   | 1.0922  | ↑ | 0.12727    | 0.60383  | 0.92014 | 0.93586 | ↓ | -0.09563   | 0.7307     | 0.96358 | 1.0269  | ↑ | 0.038293   |

|            |                                                             |             |          |         |   |           |          |         |         |   |            |          |         |         |   |             |
|------------|-------------------------------------------------------------|-------------|----------|---------|---|-----------|----------|---------|---------|---|------------|----------|---------|---------|---|-------------|
| P00747     | Plasminogen                                                 | 0.031981    | 0.26933  | 1.1153  | ↑ | 0.15748   | 0.37894  | 0.84051 | 0.94793 | ↓ | -0.077153  | 0.1633   | 0.81079 | 0.91302 | ↓ | -0.13128    |
| P13796     | Plastin-2                                                   | 0.0070606   | 0.1356   | 1.2321  | ↑ | 0.30107   | 0.048289 | 0.537   | 0.83065 | ↓ | -0.2677    | 0.45759  | 0.90109 | 0.94024 | ↓ | -0.088896   |
| P02775     | Platelet basic protein                                      | 0.0042698   | 0.11451  | 0.4326  | ↓ | -1.2089   | 0.027004 | 0.537   | 2.3727  | ↑ | 1.2465     | 0.43052  | 0.89152 | 1.4772  | ↑ | 0.56282     |
| P02776     | Platelet factor 4                                           | 0.61351     | 0.78415  | 0.85681 | ↓ | -0.22296  | 0.2362   | 0.82645 | 1.5042  | ↑ | 0.58902    | 0.74302  | 0.96358 | 1.0336  | ↑ | 0.047747    |
| P10720     | Platelet factor 4 variant                                   | 0.81074     | 0.89652  | 1.0063  | ↓ | 0.0090251 | 0.72422  | 0.94631 | 1.0554  | ↑ | 0.077738   | 0.02619  | 0.61501 | 1.3813  | ↑ | 0.46601     |
| P08567     | Pleckstrin                                                  | 0.28973     | 0.62387  | 1.3757  | ↑ | 0.46017   | 0.3153   | 0.82645 | 0.73745 | ↓ | -0.43938   | 0.98058  | 0.99807 | 1.0806  | ↑ | 0.11178     |
| P20742     | Pregnancy zone protein                                      | 0.10211     | 0.40261  | 0.84541 | ↓ | -0.24228  | 0.31472  | 0.82645 | 1.1118  | ↑ | 0.15286    | 0.35222  | 0.89152 | 1.1073  | ↑ | 0.14709     |
| F8W8W4     | Prenylcysteine oxidase 1                                    | 0.46413     | 0.72539  | 0.93732 | ↓ | -0.09338  | 0.017354 | 0.537   | 1.2744  | ↑ | 0.3498     | 0.7908   | 0.96799 | 1.0325  | ↑ | 0.046134    |
| A0A075B6R9 | Probable non-functional immunoglobulin kappa variable 2D-24 | 0.50932     | 0.74381  | 1.113   | ↑ | 0.15445   | 0.87067  | 0.96004 | 1.7269  | ↑ | 0.78817    | 0.77532  | 0.96358 | 0.98221 | ↓ | -0.025902   |
| Q15113     | Procollagen C-endopeptidase enhancer 1                      | 0.060309    | 0.3177   | 0.58211 | ↓ | -0.78065  | 0.24359  | 0.82645 | 1.4898  | ↓ | 0.57516    | 0.99408  | 0.99807 | 1.5438  | ↑ | 0.62651     |
| P07737     | Profilin-1                                                  | 0.40974     | 0.69869  | 1.4601  | ↑ | 0.54611   | 0.77134  | 0.96004 | 0.84686 | ↓ | -0.2398    | 0.23797  | 0.85109 | 0.55536 | ↓ | -0.84849    |
| P12273     | Prolactin-inducible protein                                 | 0.81031     | 0.89652  | 1.8318  | ↑ | 0.87327   | 0.92078  | 0.96665 | 0.55474 | ↓ | -0.85012   | 0.47461  | 0.90109 | 0.41979 | ↓ | -1.2523     |
| P02760     | Protein AMBP                                                | 0.10509     | 0.40261  | 1.2306  | ↑ | 0.29934   | 0.57001  | 0.90291 | 1.0411  | ↑ | 0.058153   | 0.83715  | 0.97906 | 0.95076 | ↓ | -0.072846   |
| P05109     | Protein S100-A8                                             | 0.57722     | 0.77375  | 1.1407  | ↑ | 0.18986   | 0.89904  | 0.96004 | 0.99047 | ↓ | -0.01382   | 0.4385   | 0.89152 | 1.2228  | ↑ | 0.29017     |
| P06702     | Protein S100-A9                                             | 0.097332    | 0.40261  | 1.9205  | ↑ | 0.94148   | 0.84696  | 0.96004 | 0.95228 | ↓ | -0.070543  | 0.57499  | 0.95166 | 0.7001  | ↓ | -0.51436    |
| G3V2W1     | Protein Z-dependent protease inhibitor                      | 0.10237     | 0.40261  | 0.89201 | ↓ | -0.16487  | 0.49388  | 0.891   | 1.078   | ↑ | 0.10834    | 0.92972  | 0.99807 | 1.0104  | ↑ | 0.014889    |
| Q92954     | Proteoglycan 4                                              | 0.12448     | 0.44784  | 1.2327  | ↑ | 0.30183   | 0.087464 | 0.63494 | 0.77577 | ↓ | -0.36629   | 0.2315   | 0.84494 | 0.83806 | ↓ | -0.25488    |
| P00734     | Prothrombin                                                 | 0.058806    | 0.3177   | 0.84162 | ↓ | -0.24875  | 0.79656  | 0.96004 | 0.97913 | ↓ | -0.030421  | 0.19495  | 0.84494 | 0.89232 | ↓ | -0.16437    |
| Q9NPG4     | Protocadherin-12                                            | 0.31186     | 0.63417  | 1.1622  | ↑ | 0.21686   | 0.50176  | 0.89168 | 0.88632 | ↓ | -0.17411   | 0.40762  | 0.89152 | 1.3578  | ↑ | 0.44124     |
| Q16609     | Putative apolipoprotein(a)-like protein 2                   | 0.83665     | 0.90588  | 0.87359 | ↓ | -0.19498  | 0.39844  | 0.87066 | 1.4809  | ↑ | 0.56645    | 0.39452  | 0.89152 | 2.2088  | ↑ | 1.1433      |
| Q6ZMU1     | Putative protein C3P1                                       | 0.30381     | 0.63234  | 1.1201  | ↑ | 0.16365   | 0.47069  | 0.891   | 0.88351 | ↓ | -0.17868   | 0.4922   | 0.90109 | 0.89166 | ↓ | -0.16543    |
| Q6UXR4     | Putative serpin A13                                         | 0.23763     | 0.59045  | 0.72941 | ↓ | -0.45521  | 0.10466  | 0.6604  | 1.3889  | ↑ | 0.47395    | 0.087185 | 0.75239 | 1.2618  | ↑ | 0.33547     |
| A0A804F6T5 | Pyruvate kinase PKM                                         | 0.45879     | 0.72539  | 0.95232 | ↓ | -0.070481 | 0.027531 | 0.537   | 1.1882  | ↑ | 0.2488     | 0.86855  | 0.98927 | 0.99325 | ↓ | -0.0097652  |
| A6NIZ1     | Ras-related protein Rap-1b-like protein                     | 0.83816     | 0.90588  | 0.915   | ↓ | -0.12816  | 0.22845  | 0.82645 | 1.2969  | ↓ | 0.37501    | 0.32187  | 0.89152 | 1.1355  | ↑ | 0.18328     |
| P23470     | Receptor-type tyrosine-protein phosphatase gamma            | 0.28575     | 0.62387  | 1.2543  | ↑ | 0.32683   | 0.1498   | 0.7891  | 0.71209 | ↓ | -0.48987   | 0.1422   | 0.78429 | 0.70668 | ↓ | -0.50087    |
| P02753     | Retinol-binding protein 4                                   | 0.91543     | 0.95424  | 0.99111 | ↓ | -0.012881 | 0.81908  | 0.96004 | 1.0206  | ↑ | 0.029371   | 0.52387  | 0.90109 | 0.94986 | ↓ | -0.07421    |
| O95980     | Reversion-inducing cysteine-rich protein with Kazal motifs  | 0.49374     | 0.73876  | 0.87204 | ↓ | -0.19753  | 0.51536  | 0.89861 | 1.1003  | ↑ | 0.13791    | 0.015182 | 0.5969  | 1.5049  | ↑ | 0.5897      |
| J3KRE2     | Rho GDP-dissociation inhibitor 1                            | 0.24449     | 0.59045  | 1.2256  | ↑ | 0.29348   | 0.68273  | 0.94631 | 1.1983  | ↑ | 0.261      | 0.7486   | 0.96358 | 0.99999 | ↓ | -9.2819E-06 |
| A0A096LPE2 | SAA2-SAA4 readthrough                                       | 0.000057466 | 0.016678 | 3.2845  | ↑ | 1.7157    | 0.40274  | 0.87315 | 0.95322 | ↓ | -0.069121  | 0.6205   | 0.9541  | 3.2538  | ↑ | 1.7021      |
| C9JHR8     | Scavenger receptor cysteine-rich type 1 protein M130        | 0.9079      | 0.95314  | 0.98009 | ↓ | -0.02901  | 0.98719  | 0.99209 | 1.0062  | ↑ | 0.0089363  | 0.63669  | 0.9541  | 0.9679  | ↓ | -0.047066   |
| A0A182DWH7 | Selenoprotein P (Fragment)                                  | 0.86184     | 0.92452  | 1.0102  | ↑ | 0.014611  | 0.49534  | 0.891   | 0.69416 | ↓ | -0.52666   | 0.41144  | 0.89152 | 0.43892 | ↓ | -1.188      |
| P02787     | Serotransferrin                                             | 0.021528    | 0.2117   | 0.77147 | ↓ | -0.37432  | 0.33374  | 0.82645 | 1.1121  | ↑ | 0.15335    | 0.46848  | 0.90109 | 1.0855  | ↑ | 0.11839     |
| P02743     | Serum amyloid P-component                                   | 0.0085276   | 0.13976  | 1.5249  | ↑ | 0.60875   | 0.043346 | 0.537   | 0.55509 | ↓ | -0.84921   | 0.19939  | 0.84494 | 0.6658  | ↓ | -0.58683    |
| A0A0C4DGN2 | Sex hormone-binding globulin (Fragment)                     | 0.027258    | 0.25128  | 0.84394 | ↓ | -0.24479  | 0.21541  | 0.82645 | 1.2371  | ↑ | 0.307      | 0.029187 | 0.61501 | 1.2648  | ↑ | 0.33891     |
| P09486     | SPARC                                                       | 0.8136      | 0.89652  | 0.92653 | ↓ | -0.11008  | 0.30764  | 0.82645 | 1.2009  | ↑ | 0.26406    | 0.12413  | 0.78429 | 1.3965  | ↑ | 0.48177     |
| O00391     | Sulphydryl oxidase 1                                        | 0.59714     | 0.78049  | 0.94243 | ↓ | -0.085546 | 0.045816 | 0.537   | 1.2556  | ↑ | 0.32841    | 0.37644  | 0.89152 | 0.8993  | ↓ | -0.15313    |
| Q9Y490     | Talin-1                                                     | 0.37549     | 0.6644   | 1.0804  | ↑ | 0.11158   | 0.95952  | 0.98627 | 0.98711 | ↓ | -0.018714  | 0.41262  | 0.89152 | 0.92262 | ↓ | -0.11619    |
| A0A087WXC4 | Tenascin-N                                                  | 0.011731    | 0.15675  | 3.2996  | ↑ | 1.7223    | 0.030798 | 0.537   | 0.39026 | ↓ | -1.3575    | 0.22389  | 0.84494 | 0.68744 | ↓ | -0.54069    |
| E9PHK0     | Tetranectin                                                 | 0.15781     | 0.4903   | 1.08    | ↑ | 0.11108   | 0.88164  | 0.96004 | 0.99541 | ↓ | -0.0066408 | 0.47081  | 0.90109 | 0.95027 | ↓ | -0.073594   |
| P07996     | Thrombospondin-1                                            | 0.68869     | 0.83768  | 0.97179 | ↓ | -0.041283 | 0.83391  | 0.96004 | 1.0268  | ↑ | 0.038122   | 0.63629  | 0.9541  | 1.0367  | ↑ | 0.052049    |
| E7ES19     | Thrombospondin-4                                            | 0.66091     | 0.82217  | 0.98125 | ↓ | -0.027313 | 0.77505  | 0.96004 | 1.0351  | ↑ | 0.049797   | 0.94374  | 0.99807 | 0.99812 | ↓ | -0.0027164  |
| P62328     | Thymosin beta-4                                             | 0.084738    | 0.3887   | 1.3843  | ↑ | 0.46913   | 0.45728  | 0.89035 | 0.91704 | ↓ | -0.12494   | 0.94156  | 0.99807 | 0.98494 | ↓ | -0.021897   |
| P05543     | Thyroxine-binding globulin                                  | 0.036531    | 0.27954  | 1.3291  | ↑ | 0.41041   | 0.33056  | 0.82645 | 0.85403 | ↓ | -0.22764   | 0.070731 | 0.75239 | 0.74403 | ↓ | -0.42657    |
| F2Z393     | Transaldolase                                               | 0.096687    | 0.40261  | 1.2172  | ↑ | 0.28353   | 0.19255  | 0.82645 | 0.84716 | ↓ | -0.2393    | 0.97598  | 0.99807 | 0.98801 | ↓ | -0.017404   |
| Q15582     | Transforming growth factor-beta-induced protein ig-h3       | 0.23701     | 0.59045  | 0.87279 | ↓ | -0.1963   | 0.28934  | 0.82645 | 1.0947  | ↑ | 0.13059    | 0.22223  | 0.84494 | 1.1133  | ↑ | 0.15484     |
| P37802     | Transgelin-2                                                | 0.045254    | 0.29387  | 1.2923  | ↑ | 0.3699    | 0.56926  | 0.90291 | 0.96211 | ↓ | -0.055728  | 0.99454  | 0.99807 | 1.0354  | ↑ | 0.050236    |
| A0A087WT59 | Transthyretin                                               | 0.018913    | 0.20181  | 2.4093  | ↑ | 1.2686    | 0.18779  | 0.82645 | 0.71731 | ↓ | -0.47933   | 0.16765  | 0.81079 | 0.67005 | ↓ | -0.57767    |
| O43280     | Trehalase                                                   | 0.35134     | 0.6451   | 1.0886  | ↑ | 0.12247   | 0.87759  | 0.96004 | 1.3393  | ↓ | 0.42152    | 0.79027  | 0.96799 | 0.9298  | ↓ | -0.10501    |
| P60174     | Triosephosphate isomerase                                   | 0.41641     | 0.70597  | 1.2894  | ↑ | 0.36669   | 0.3698   | 0.82645 | 0.75669 | ↓ | -0.40223   | 0.7582   | 0.96358 | 0.96392 | ↓ | -0.053014   |
| P67936     | Tropomyosin alpha-4 chain                                   | 0.78492     | 0.88042  | 0.96028 | ↓ | -0.058473 | 0.27119  | 0.82645 | 1.3313  | ↑ | 0.41285    | 0.77448  | 0.96358 | 0.98418 | ↓ | -0.023009   |
| P68363     | Tubulin alpha-1B chain                                      | 0.34704     | 0.6451   | 1.1672  | ↑ | 0.22311   | 0.29664  | 0.82645 | 0.82922 | ↓ | -0.27017   | 0.9615   | 0.99807 | 1.0146  | ↑ | 0.020928    |
| P68366     | Tubulin alpha-4A chain                                      | 0.28799     | 0.62387  | 1.2913  | ↑ | 0.36885   | 0.23371  | 0.82645 | 0.68746 | ↓ | -0.54066   | 0.92119  | 0.99807 | 0.92705 | ↓ | -0.10928    |
| Q9H4B7     | Tubulin beta-1 chain                                        | 0.53467     | 0.75468  | 1.0806  | ↑ | 0.11179   | 0.89956  | 0.96004 | 0.97546 | ↓ | -0.035842  | 0.25955  | 0.86032 | 0.86591 | ↓ | -0.20771    |
| Q6EMK4     | Vasorin                                                     | 0.71109     | 0.8386   | 0.89738 | ↓ | -0.1562   | 0.55984  | 0.90291 | 1.2503  | ↑ | 0.32223    | 0.19395  | 0.84494 | 1.3565  | ↑ | 0.43991     |
| A0A712V2Y2 | Vesicle-fusing ATPase                                       | 0.97595     | 0.98486  | 0.75041 | ↓ | -0.41426  | 0.29562  | 0.82645 | 0.8141  | ↓ | -0.29673   | 0.55952  | 0.94319 | 1.164   | ↑ | 0.21913     |
| P18206     | Vinculin                                                    | 0.4572      | 0.72539  | 1.0931  | ↑ | 0.12843   | 0.18081  | 0.82645 | 0.84929 | ↓ | -0.23566   | 0.95034  | 0.99807 | 0.98883 | ↓ | -0.016204   |
| E7END6     | Vitamin K-dependent protein C                               | 0.39369     | 0.68701  | 0.87512 | ↓ | -0.19244  | 0.16135  | 0.80675 | 1.2243  | ↑ | 0.29194    | 0.38763  | 0.89152 | 1.118   | ↑ | 0.16091     |
| A0A0S2Z4L3 | Vitamin K-dependent protein S (Fragment)                    | 0.14963     | 0.4903   | 1.1077  | ↑ | 0.14758   | 0.42013  | 0.87315 | 0.93172 | ↓ | -0.10203   | 0.42027  | 0.89152 | 0.93007 | ↓ | -0.10459    |
| P22891     | Vitamin K-dependent protein Z                               | 0.75171     | 0.85952  | 1.0217  | ↑ | 0.03099   | 0.71763  | 0.94631 | 1.0383  | ↑ | 0.054217   | 0.14122  | 0.78429 | 1.1643  | ↑ | 0.21942     |



|        |                                                  |         |         |         |   |          |         |         |         |   |           |         |         |         |   |            |
|--------|--------------------------------------------------|---------|---------|---------|---|----------|---------|---------|---------|---|-----------|---------|---------|---------|---|------------|
| Q7Z5L0 | Vitelline membrane outer layer protein 1 homolog | 0.50979 | 0.74381 | 1.1172  | ↑ | 0.15995  | 0.71858 | 0.94631 | 1.1462  | ↑ | 0.19683   | 0.75645 | 0.96358 | 1.6464  | ↑ | 0.71927    |
| P04004 | Vitronectin                                      | 0.97461 | 0.98486 | 0.99305 | ↓ | -0.01006 | 0.32857 | 0.82645 | 1.1819  | ↑ | 0.24109   | 0.26658 | 0.87225 | 1.1131  | ↑ | 0.15463    |
| P04275 | von Willebrand factor                            | 0.11266 | 0.41542 | 1.1032  | ↑ | 0.14174  | 0.53157 | 0.89861 | 1.0441  | ↑ | 0.062321  | 0.1222  | 0.78429 | 0.89372 | ↓ | -0.16211   |
| O75083 | WD repeat-containing protein 1                   | 0.63879 | 0.80031 | 1.0728  | ↑ | 0.10141  | 0.66165 | 0.94631 | 1.0482  | ↑ | 0.067965  | 0.90284 | 0.99807 | 0.99767 | ↓ | -0.0033625 |
| P25311 | Zinc-alpha-2-glycoprotein                        | 0.25879 | 0.60112 | 1.0879  | ↑ | 0.12153  | 0.56818 | 0.90291 | 0.94991 | ↓ | -0.074137 | 0.52257 | 0.90109 | 0.94199 | ↓ | -0.086215  |

Supplementary Table 9. Comparison of the effects of radiation at 96 h post-irradiation.

| UniProtKB  | ProteinNames                                                      | 96 Hour vs. Pre |          |         |           | 96 Hour ExRad I vs. Vehicle |           |         |           | 96 Hour ExRad II vs. Vehicle |            |          |           |          |
|------------|-------------------------------------------------------------------|-----------------|----------|---------|-----------|-----------------------------|-----------|---------|-----------|------------------------------|------------|----------|-----------|----------|
|            |                                                                   | p-value         | FDR      | FC      | Log2(FC)  | p-value                     | FDR       | FC      | Log2(FC)  | p-value                      | FDR        | FC       | Log2(FC)  |          |
| P62258     | 14-3-3 protein epsilon                                            | 0.30725         |          | 0.66159 | 1.0712    | 0.099163                    | 0.71329   | 0.93138 | 0.97069   | -0.042913                    | 0.88643    | 0.96138  | 1.0123    | 0.017587 |
| P61981     | 14-3-3 protein gamma                                              | 0.27831         |          | 0.63645 | 1.1595    | 0.21354                     | 0.32839   | 0.74046 | 0.84512   | -0.24277                     | 0.013419   | 0.19793  | 0.63792   | -0.64856 |
| P63104     | 14-3-3 protein zeta/delta                                         | 0.62087         |          | 0.81782 | 0.96659   | -0.049027                   | 0.56872   | 0.9012  | 1.0565    | 0.07923                      | 0.10243    | 0.39524  | 1.1449    | 0.19516  |
| A0A2R8Y6G6 | 2-phospho-D-glycerate hydro-lyase                                 | 0.04261         |          | 0.25762 | 1.2338    | 0.30305                     | 0.12182   | 0.66929 | 0.81012   | -0.30379                     | 0.00012565 | 0.020716 | 0.54126   | -0.88561 |
| P08253     | 72 kDa type IV collagenase                                        | 0.18274         |          | 0.52338 | 1.1707    | 0.22736                     | 0.5369    | 0.9012  | 0.91697   | -0.12505                     | 0.50197    | 0.81601  | 0.90518   | -0.14372 |
| A0A7P0TAI0 | 78 kDa glucose-regulated protein                                  | 0.14719         |          | 0.45706 | 0.87213   | -0.19738                    | 0.23669   | 0.72733 | 1.237     | 0.30679                      | 0.080152   | 0.35291  | 1.2901    | 0.36744  |
| Q76LX8     | A disintegrin and metalloproteinase with thrombospondin motifs 13 | 0.94928         |          | 0.97915 | 1.0282    | 0.040097                    | 0.96048   | 0.97704 | 0.99087   | -0.013237                    | 0.1086     | 0.3999   | 1.2888    | 0.36601  |
| Q92484     | Acid sphingomyelinase-like phosphodiesterase 3a                   | 0.040109        |          | 0.25762 | 0.746     | -0.42276                    | 0.30359   | 0.73444 | 1.2465    | 0.31785                      | 0.0024701  | 0.064114 | 1.9201    | 0.94118  |
| P68032     | Actin, alpha cardiac muscle 1                                     | 0.51825         |          | 0.79214 | 0.84483   | -0.24327                    | 0.21756   | 0.71313 | 1.7138    | 0.77716                      | 0.040777   | 0.30631  | 3.7631    | 1.9119   |
| P60709     | Actin, cytoplasmic 1                                              | 0.92756         |          | 0.9669  | 1.004     | 0.0057547                   | 0.58349   | 0.9012  | 1.1257    | 0.17088                      | 0.80989    | 0.92247  | 1.2843    | 0.36093  |
| I3L4N8     | Actin, cytoplasmic 2                                              | 0.20193         |          | 0.55225 | 0.85455   | -0.22677                    | 0.66293   | 0.92    | 1.0772    | 0.10728                      | 0.20223    | 0.54733  | 1.4044    | 0.48994  |
| Q15848     | Adiponectin                                                       | 0.71355         |          | 0.85457 | 1.0781    | 0.10848                     | 0.28868   | 0.73444 | 1.3336    | 0.41532                      | 0.59855    | 0.84351  | 0.90631   | -0.14192 |
| K7ER69     | Adipsin                                                           | 0.28118         |          | 0.63806 | 0.90291   | -0.14735                    | 0.0038121 | 0.55579 | 1.5396    | 0.62254                      | 0.036015   | 0.30356  | 1.2531    | 0.32552  |
| P43652     | Afamin                                                            | 0.12431         |          | 0.43144 | 1.0677    | 0.094513                    | 0.17858   | 0.66929 | 0.92642   | -0.11026                     | 0.0020756  | 0.061229 | 0.84458   | -0.24369 |
| A0A0C4DGB6 | Albumin                                                           | 0.4382          |          | 0.74721 | 0.82151   | -0.28364                    | 0.014375  | 0.60582 | 0.61115   | -0.71039                     | 0.0095222  | 0.16524  | 0.66593   | -0.58657 |
| P02763     | Alpha-1-acid glycoprotein 1                                       | 0.0010036       | 0.042293 | 4.1483  | 2.0525    | 0.75102                     | 0.93641   | 2.5015  | 1.3228    | 0.090228                     | 0.36968    | 0.47107  | -1.086    |          |
| P01011     | Alpha-1-antichymotrypsin                                          | 0.061929        | 0.29466  | 2.4583  | 1.2977    | 0.077914                    | 0.66929   | 1.6061  | 0.68359   | 0.28365                      | 0.61266    | 1.2847   | 0.36143   |          |
| A0A024R6I7 | Alpha-1-antitrypsin                                               | 0.07961         | 0.32618  | 1.7532  | 0.81      | 0.32947                     | 0.74046   | 0.67551 | -0.56594  | 0.64399                      | 0.86256    | 0.79367  | -0.33339  |          |
| P04217     | Alpha-1B-glycoprotein                                             | 0.74442         | 0.86296  | 0.9665  | -0.049164 | 0.66077                     | 0.92      | 0.95186 | -0.071184 | 0.75315                      | 0.92247    | 0.95858  | -0.061029 |          |
| P08697     | Alpha-2-antiplasmin                                               | 0.63485         | 0.81782  | 1.0235  | 0.033544  | 0.38235                     | 0.79996   | 1.0811  | 0.11247   | 0.83113                      | 0.9394     | 1.0119   | 0.017006  |          |
| C9JV77     | Alpha-2-HS-glycoprotein                                           | 0.16831         | 0.50233  | 0.77902 | -0.36027  | 0.74014                     | 0.93641   | 0.95129 | -0.072041 | 0.38916                      | 0.72577    | 1.2641   | 0.33812   |          |
| P01023     | Alpha-2-macroglobulin                                             | 0.21487         | 0.57106  | 0.92226 | -0.11675  | 0.59693                     | 0.9077    | 1.0421  | 0.059492  | 0.25027                      | 0.59722    | 1.0923   | 0.12743   |          |
| A0A7I2V4Y4 | Alpha-actinin-1                                                   | 0.078518        | 0.32618  | 0.84787 | -0.23809  | 0.28328                     | 0.73444   | 1.12    | 0.16355   | 0.10358                      | 0.39524    | 1.1642   | 0.21939   |          |
| A0A0C4DGL1 | Alpha-mannosidase 2x                                              | 0.65236         | 0.82595  | 0.95623 | -0.064568 | 0.41192                     | 0.82664   | 0.90707 | -0.14072  | 0.022255                     | 0.23447    | 0.70188  | -0.51071  |          |
| P54802     | Alpha-N-acetylglucosaminidase                                     | 0.39005         | 0.72368  | 0.92453 | -0.11321  | 0.15337                     | 0.66929   | 0.8271  | -0.27387  | 0.38737                      | 0.72577    | 1.1113   | 0.15222   |          |
| A0A7P0T8D1 | Angiotensin 1-10                                                  | 0.13996         | 0.44879  | 1.1709  | 0.22764   | 0.25541                     | 0.73444   | 1.1128  | 0.15418   | 0.86976                      | 0.95989    | 1.003    | 0.0043609 |          |
| A0A0A0MSN4 | Angiotensin-converting enzyme                                     | 0.069371        | 0.30661  | 0.79532 | -0.33039  | 0.58185                     | 0.9012    | 1.055   | 0.077292  | 0.63929                      | 0.86256    | 1.0337   | 0.047848  |          |
| P04083     | Annexin A1                                                        | 0.82741         | 0.90778  | 0.88954 | -0.16887  | 0.58966                     | 0.9013    | 1.0862  | 0.11925   | 0.11523                      | 0.3999     | 1.2053   | 0.2694    |          |
| P01008     | Antithrombin-III                                                  | 0.38134         | 0.71652  | 0.9233  | -0.11514  | 0.33133                     | 0.74046   | 1.1396  | 0.18853   | 0.34909                      | 0.68512    | 1.095    | 0.13093   |          |
| F8W696     | Apolipoprotein A-I                                                | 0.13382         | 0.44356  | 0.87666 | -0.18991  | 0.077369                    | 0.66929   | 1.2062  | 0.27051   | 0.12737                      | 0.42515    | 1.175    | 0.23267   |          |
| P06727     | Apolipoprotein A-IV                                               | 0.014905        | 0.17669  | 0.85459 | -0.2267   | 0.69605                     | 0.93138   | 0.97899 | -0.030635 | 0.98344                      | 0.99362    | 1.0107   | 0.015364  |          |
| P04114     | Apolipoprotein B-100                                              | 0.88328         | 0.94484  | 0.98749 | -0.018165 | 0.10914                     | 0.66929   | 1.1776  | 0.23583   | 0.0026184                    | 0.064114   | 1.2932   | 0.37097   |          |
| K7ER74     | Apolipoprotein C-II                                               | 0.1912          | 0.53718  | 1.6269  | 0.70209   | 0.66427                     | 0.92      | 0.93177 | -0.10195  | 0.35019                      | 0.68512    | 0.62062  | -0.68822  |          |
| B0YIW2     | Apolipoprotein C-III                                              | 0.94333         | 0.97643  | 0.99296 | -0.01019  | 0.57672                     | 0.9012    | 1.0587  | 0.082244  | 0.57223                      | 0.84351    | 1.2058   | 0.26995   |          |
| P02649     | Apolipoprotein E                                                  | 0.0047099       | 0.086839 | 1.234   | 0.30338   | 0.13961                     | 0.66929   | 1.1749  | 0.23254   | 0.086817                     | 0.36968    | 1.1768   | 0.23481   |          |
| P08519     | Apolipoprotein(a)                                                 | 0.33636         | 0.68606  | 1.0487  | 0.068623  | 0.13687                     | 0.66929   | 0.8615  | -0.21507  | 0.024637                     | 0.24227    | 0.79162  | -0.33712  |          |
| O75882     | Attractin                                                         | 0.56971         | 0.80326  | 0.96245 | -0.055223 | 0.39914                     | 0.81204   | 0.9419  | -0.086351 | 0.5308                       | 0.8285     | 0.96078  | -0.057718 |          |
| P02749     | Beta-2-glycoprotein 1                                             | 0.36476         | 0.70792  | 0.94879 | -0.075839 | 0.062977                    | 0.66929   | 1.1378  | 0.1862    | 0.020566                     | 0.23334    | 1.2283   | 0.2967    |          |
| J3KRP0     | Beta-Ala-His dipeptidase                                          | 0.97863         | 0.99463  | 0.95363 | -0.068501 | 0.91557                     | 0.97704   | 1.0154  | 0.022116  | 0.35879                      | 0.68729    | 0.92436  | -0.11348  |          |
| P43251     | Biotinidase                                                       | 0.77487         | 0.88106  | 0.98896 | -0.016021 | 0.11293                     | 0.66929   | 0.76377 | -0.38879  | 0.849                        | 0.94512    | 1.0072   | 0.010377  |          |
| J3KSD8     | Bleomycin hydrolase (Fragment)                                    | 0.26117         | 0.62407  | 0.26142 | -1.9356   | 0.50555                     | 0.89842   | 1.2584  | 0.33155   | 0.55598                      | 0.84109    | 0.79651  | -0.32824  |          |
| Q9UBW5     | Bridging integrator 2                                             | 0.3264          | 0.68395  | 1.0113  | 0.016154  | 0.34634                     | 0.75126   | 0.85069 | -0.2333   | 0.58963                      | 0.84351    | 0.97757  | -0.032731 |          |
| B4E1Z4     | C3/C5 convertase                                                  | 0.019621        | 0.17881  | 1.1399  | 0.18884   | 0.08597                     | 0.66929   | 0.90323 | -0.14684  | 0.78479                      | 0.92247    | 0.9829   | -0.024877 |          |
| P04003     | C4b-binding protein alpha chain                                   | 0.019037        | 0.17881  | 1.1278  | 0.17356   | 0.061457                    | 0.66929   | 0.85851 | -0.22009  | 0.053632                     | 0.33537    | 0.83232  | -0.26479  |          |
| P20851     | C4b-binding protein beta chain                                    | 0.77378         | 0.88106  | 0.94984 | -0.074238 | 0.30261                     | 0.73444   | 1.1643  | 0.21951   | 0.44226                      | 0.76431    | 1.1064   | 0.14588   |          |
| H3BNC6     | Cadherin-1                                                        | 0.71552         | 0.85457  | 1.0517  | 0.072782  | 0.9685                      | 0.98182   | 0.98846 | -0.016743 | 0.92941                      | 0.99362    | 0.97044  | -0.043288 |          |
| P55290     | Cadherin-13                                                       | 0.020003        | 0.17881  | 0.6702  | -0.57733  | 0.26661                     | 0.73444   | 1.2761  | 0.35171   | 0.011756                     | 0.18253    | 1.5901   | 0.6691    |          |
| P33151     | Cadherin-5                                                        | 0.17535         | 0.50714  | 1.3922  | 0.47732   | 0.72334                     | 0.93138   | 1.1956  | 0.25778   | 0.16621                      | 0.49031    | 0.68339  | -0.54921  |          |
| Q9NZT1     | Calmodulin-like protein 5                                         | 0.9696          | 0.99299  | 0.51202 | -0.96574  | 0.53517                     | 0.9012    | 1.8621  | 0.89693   | 0.72519                      | 0.90649    | 2.1228   | 1.086     |          |
| E5RFL2     | Carbonate dehydratase I (Fragment)                                | 0.53077         | 0.79432  | 0.96282 | -0.054661 | 0.14935                     | 0.66929   | 1.3469  | 0.42965   | 0.23499                      | 0.59722    | 3.2219   | 1.6879    |          |
| P00918     | Carbonic anhydrase 2                                              | 0.73764         | 0.86009  | 0.91983 | -0.12056  | 0.55147                     | 0.9012    | 1.0903  | 0.1247    | 0.070511                     | 0.34857    | 2.1946   | 1.1339    |          |
| A0A087WSY5 | Carboxypeptidase B2                                               | 0.10674         | 0.39857  | 1.1369  | 0.18508   | 0.44108                     | 0.83644   | 0.92482 | -0.11276  | 0.00014045                   | 0.020716   | 0.63371  | -0.65811  |          |
| P15169     | Carboxypeptidase N catalytic chain                                | 0.094724        | 0.37133  | 0.82846 | -0.27149  | 0.61471                     | 0.92      | 1.0238  | 0.034001  | 0.052298                     | 0.33537    | 1.2534   | 0.32581   |          |
| P22792     | Carboxypeptidase N subunit 2                                      | 0.84245         | 0.91034  | 1.1097  | 0.1502    | 0.77368                     | 0.93641   | 0.95214 | -0.070751 | 0.33528                      | 0.67745    | 0.73918  | -0.43601  |          |











|        |                                                  |         |         |         |   |           |          |         |         |   |          |         |         |         |   |            |
|--------|--------------------------------------------------|---------|---------|---------|---|-----------|----------|---------|---------|---|----------|---------|---------|---------|---|------------|
| Q7Z5L0 | Vitelline membrane outer layer protein 1 homolog | 0.98737 | 0.99463 | 1.0057  | ↑ | 0.0082323 | 0.23646  | 0.72733 | 0.64968 | ↓ | -0.62219 | 0.77612 | 0.92247 | 0.82824 | ↓ | -0.27188   |
| P04004 | Vitronectin                                      | 0.37227 | 0.70911 | 1.129   | ↑ | 0.17501   | 0.077263 | 0.66929 | 0.74675 | ↓ | -0.4213  | 0.7848  | 0.92247 | 1.0002  | ↑ | 0.00023343 |
| P04275 | von Willebrand factor                            | 0.83757 | 0.90839 | 0.98888 | ↓ | -0.016134 | 0.7432   | 0.93641 | 1.0216  | ↑ | 0.030783 | 0.60142 | 0.84351 | 0.96668 | ↓ | -0.048894  |
| O75083 | WD repeat-containing protein 1                   | 0.32391 | 0.68395 | 0.88935 | ↓ | -0.16918  | 0.56028  | 0.9012  | 1.095   | ↑ | 0.13087  | 0.11457 | 0.3999  | 1.4264  | ↑ | 0.51238    |
| P25311 | Zinc-alpha-2-glycoprotein                        | 0.56046 | 0.80326 | 1.0621  | ↑ | 0.086926  | 0.46251  | 0.85812 | 0.91709 | ↓ | -0.12486 | 0.59911 | 0.84351 | 0.93619 | ↓ | -0.095123  |

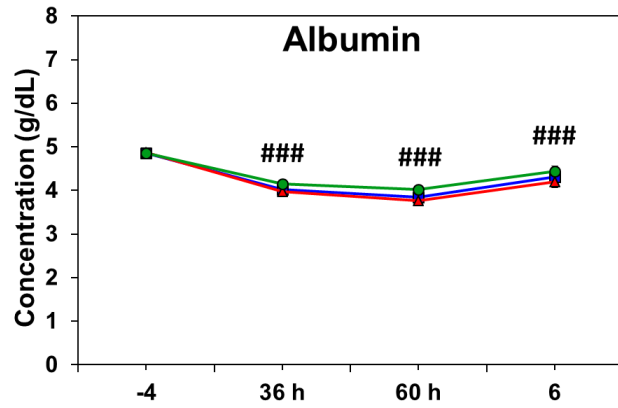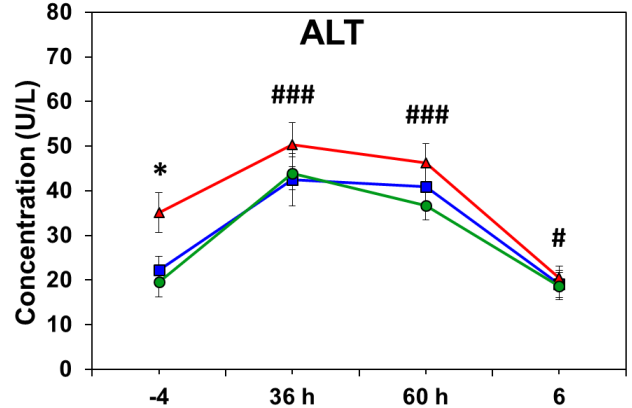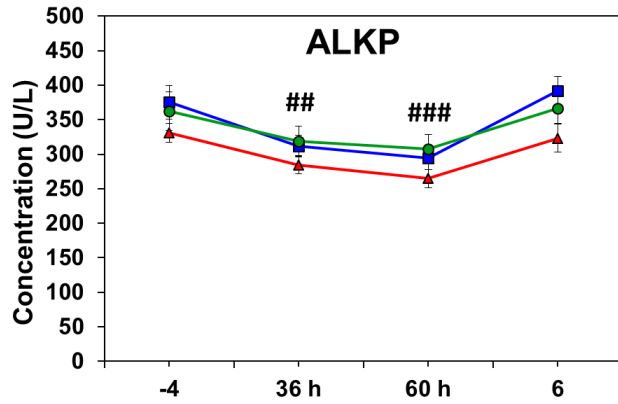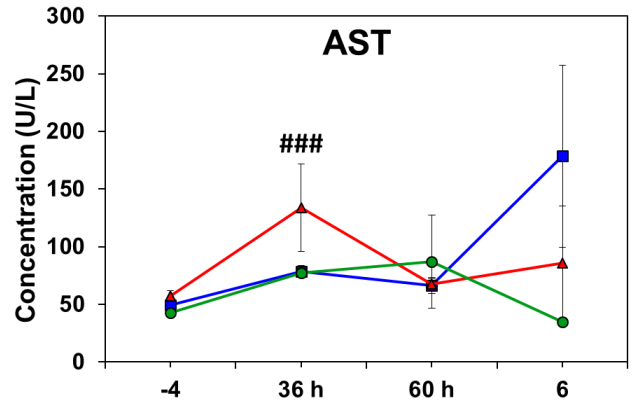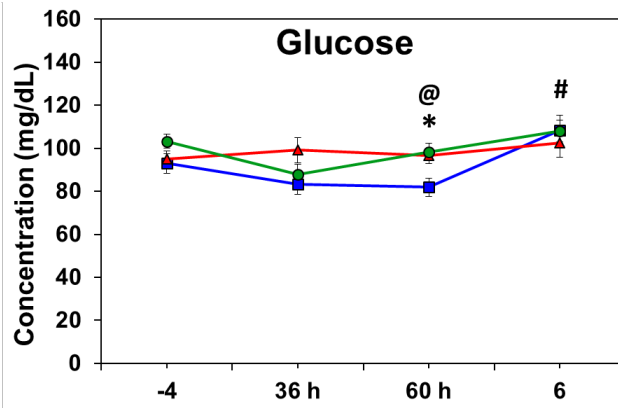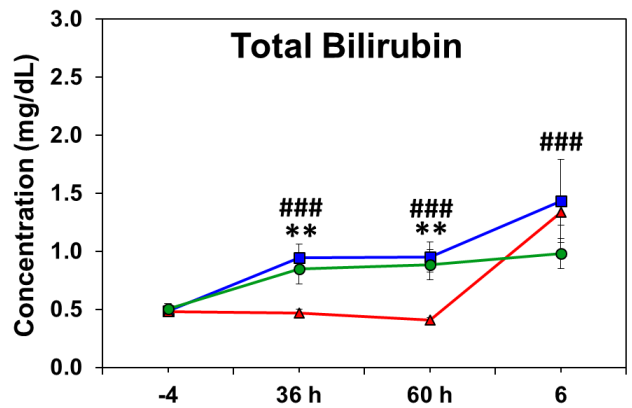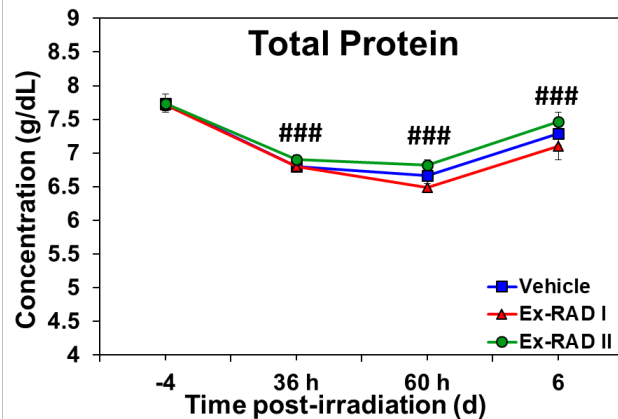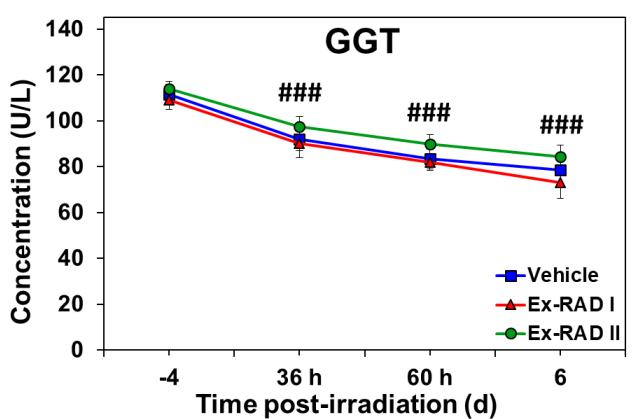

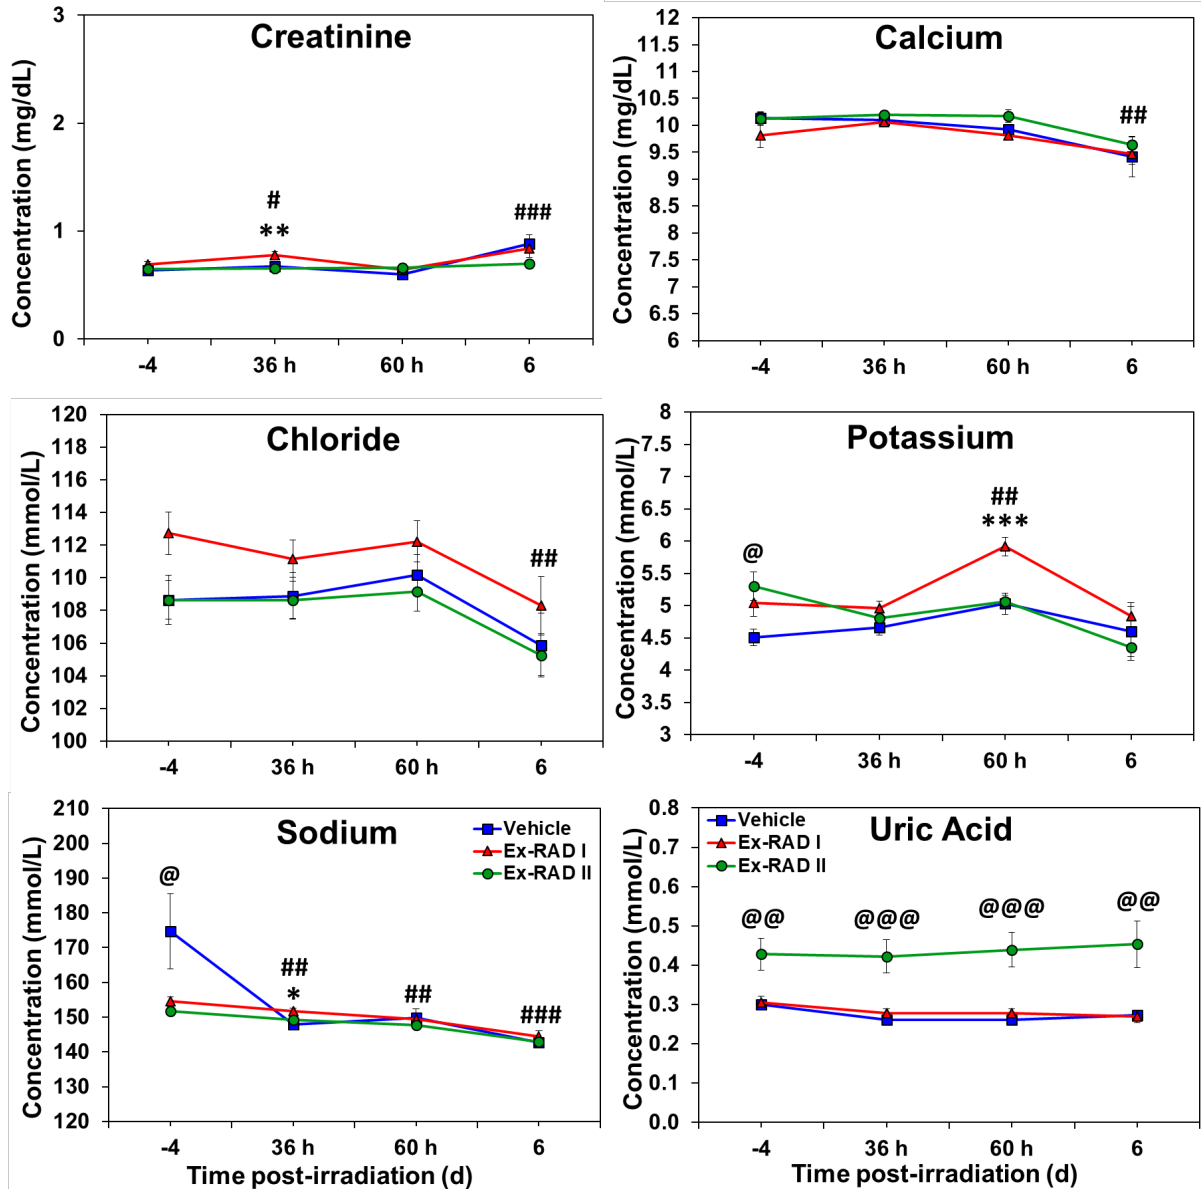

**Supplementary Figure 1.** Albumin, ALT, ALKP, AST, glucose, total bilirubin, total protein, GGT, creatinine, calcium, chloride, potassium, sodium, and uric acid concentrations on SD-4, 36 h, 60 h, and SD6 in the vehicle, Ex-Rad I, and Ex-Rad II-treated groups. A \* denotes significance between the vehicle vs Ex-Rad I group (\* = p-value < .05, \*\* = p-value < .01, and \*\*\* = p-value < .001). An @ denotes significance between the vehicle and Ex-Rad II group (@ = p-value < .05, @@ = p-value < .01, and @@@ = p-value < .001). Samples were pooled at each

time point, and the pre-irradiation time point was compared to the post-irradiation time points, denoted with # (# = p-value < .05, ## = p-value < .01, and ### = p-value < .001).
